# Supplementary material for: The promoter role of sulfur in carbon nanotube growth
Source: Royal Society of Chemistry journal article supplement (doi:10.1039/d2dt00355d), 2022-01-01
Supplement: d2dt00355d1.pdf [file d2dt00355d1.pdf]

# Supplementary information for The promoter role of sulfur in the growth efficiency of carbon nanotubes

Balázs Orbán<sup>1</sup>, Tibor Höltzl<sup>1,2,3</sup>

1. Budapest University of Technology and Economics. Szent Gellért tér 4. H1111. Budapest. Hungary
2. MTA-BME Computation Driven Research Group. Szent Gellért tér 4. H1111. Budapest. Hungary
3. Furukawa Electric Institute of Technology. Késmárk utca 28/A. H1158. Budapest. Hungary

## Table of contents

|                                                                                                                                               |   |
|-----------------------------------------------------------------------------------------------------------------------------------------------|---|
| 1. Computation method for graphene – metal system .....                                                                                       | 1 |
| 2. Effect of magnetism on the binding energy of graphene .....                                                                                | 3 |
| 3. The adsorption of graphene on partially sulfur-covered Fe fcc(111) surface .....                                                           | 5 |
| 4. Geometry optimization of Fe <sub>55</sub> based systems .....                                                                              | 6 |
| 5. Non-covalent interaction (NCI) calculation of Fe <sub>55</sub> , Fe <sub>54</sub> S and Fe <sub>49</sub> S <sub>6</sub> with nanocap ..... | 6 |
| 6. MD simulation of Fe <sub>12</sub> S+nanocap(5,0) and Fe <sub>52</sub> S <sub>3</sub> +nanocap(10,0) .....                                  | 7 |
| 7. Atomic positions of the optimized structures .....                                                                                         | 9 |

## 1. Computation method for graphene – metal system

Although the adsorption of graphene to many 3d, 4d and 5d transition metals have been calculated before, iron – graphene interaction is rare in the literature. Thus, we chose nickel as a reference metal system to verify the selected C09-vdW-DF functional and find the appropriate calculation parameters. There are several previous studies on the adsorption of graphene on Ni fcc(111) surface as nickel is commonly used catalyst for the CVD growth of graphene.

For the convergence of plane-wave cutoff energy (PW cutoff) and number of Monkhorst-Pack k-points, a (2x2) orthogonal Ni slab consisting of 3 atomic layers was used with a graphene layer on top of it. First, we converged PW cutoff with 8x8x1 k-points and the calculated total energies ( $E_{\text{total}}$ ) are listed in **Table S1** where  $E_{\text{diff}}$  represents the difference in total energies of the given row and the previous one. Then we performed the k-point

convergence with the chosen cutoff energy of 500 eV which is shown in **Table S2**. Based on the results we selected 10x10x1 k-points because further increase of the number of k-points shows negligible difference in the total energy.

**Table S1.** Total energy of graphene on Ni(2x2x3) slab with fcc(111) arrangement as a function of plane-wave cutoff energy.

| PW cutoff [eV] | $E_{\text{total}}$ [eV] | $E_{\text{diff}}$ [eV] |
|----------------|-------------------------|------------------------|
| 200            | -999.1969               | -                      |
| 250            | -1022.5878              | 23.391                 |
| 300            | -1031.3663              | 8.778                  |
| 350            | -1035.2320              | 3.866                  |
| 400            | -1036.9673              | 1.735                  |
| 450            | -1037.7105              | 0.743                  |
| <b>500</b>     | <b>-1038.0042</b>       | <b>0.294</b>           |
| 550            | -1038.0863              | 0.082                  |
| 600            | -1038.1079              | 0.022                  |
| 650            | -1038.1219              | 0.014                  |
| 700            | -1038.1392              | 0.017                  |

**Table S2.** Total energy of graphene on Ni(2x2x3) slab with fcc(111) arrangement as a function of k-points in the two periodic directions.

| K-points       | $E_{\text{total}}$ [eV] | $E_{\text{diff}}$ [eV] |
|----------------|-------------------------|------------------------|
| 2x2x1          | 183.7594                | -                      |
| 4x4x1          | 183.8548                | -0.09536               |
| 6x6x1          | 183.9195                | -0.06472               |
| 8x8x1          | 183.9021                | 0.01746                |
| <b>10x10x1</b> | <b>183.9049</b>         | <b>-0.00281</b>        |
| 12x12x1        | 183.9044                | 0.00044                |
| 14x14x1        | 183.9040                | 0.00041                |
| 16x16x1        | 183.9042                | -0.00017               |
| 18x18x1        | 183.9041                | 0.00006                |

Then the unit cell of Ni and Fe slabs with fcc structure was optimized. The parameters of the (2x2) orthogonal cell considering six atomic layers are listed in **Table S3**. Spin-polarization has a negligible effect on the size of the cell, the difference is less than 0.01 Å in the lattice constant for both metals.

**Table S3.** Optimized cell parameters of Ni and Fe slab with fcc structure of six atomic layers without spin polarization.

|          | Ni        |           |           | Fe       |          |           |
|----------|-----------|-----------|-----------|----------|----------|-----------|
|          | x         | y         | z         | x        | y        | z         |
| <b>A</b> | 4.972559  | -0.000146 | 0.000314  | 4.867366 | 0.0      | 0.0       |
| <b>B</b> | -0.000126 | 4.304575  | -0.001030 | 0.0      | 4.215396 | 6.5e-05   |
| <b>C</b> | 0.000773  | -0.002912 | 12.216619 | 0.0      | 0.000187 | 11.949321 |

The vacuum region above the surface of the metal slab was also optimized to avoid the interaction between the replicas of the system (**Figure S1**). We found that a vacuum of 15 Å is appropriate even if a bigger graphene – metal surface distance is considered in the potential energy surface calculation.

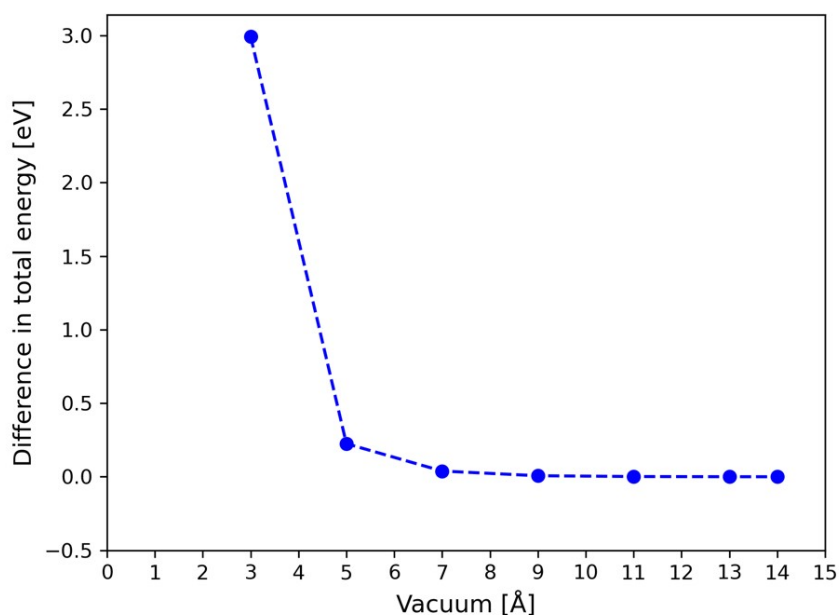

**Figure S1.** Difference in total energy of Ni(2x2x3) with fcc(111) arrangement as a function of vacuum region above it.

## 2. Effect of magnetism on the binding energy of graphene

As a reference of our computation method we calculated the binding energy of graphene to Ni fcc(111) surface as a function of distance between graphene and Ni surface. The bottom three atomic layers of Ni slab was fixed in the optimization to save computational time (instead of the calculations shown in the main text in which only the bottom layer was fixed). We considered the three most commonly studied adsorption site (top-fcc, top-hcp and fcc-hcp) of graphene in spin-unpolarized and spin-polarized case, too. Our results are shown in **Figure S2**. In case of the same graphene configuration spin polarization barely affects the binding energy comparing to spin-unpolarized calculation. the difference is 20 meV around the equilibrium distance in tf and th sites.

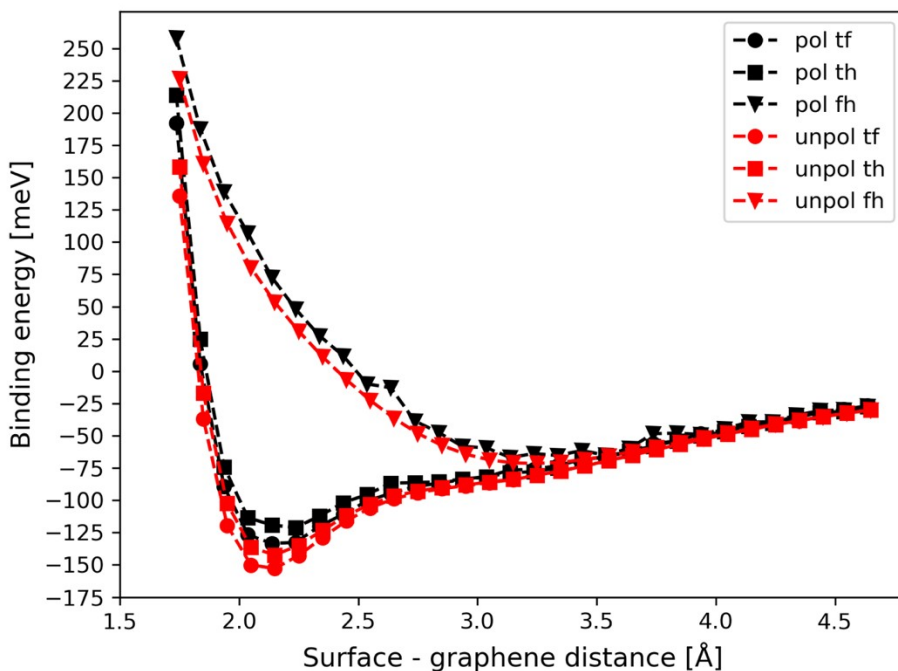

**Figure S2.** Binding energy of graphene to Ni fcc(111) surface as a function of graphene – metal surface distance.

The same calculation was performed for Fe fcc(111) surface and the results are summarized in **Figure S3**. The difference between spin-polarized and spin-unpolarized calculations is negligible for Fe, too. Equilibrium distances are the same while deviation in binding energies are less than 15 meV.

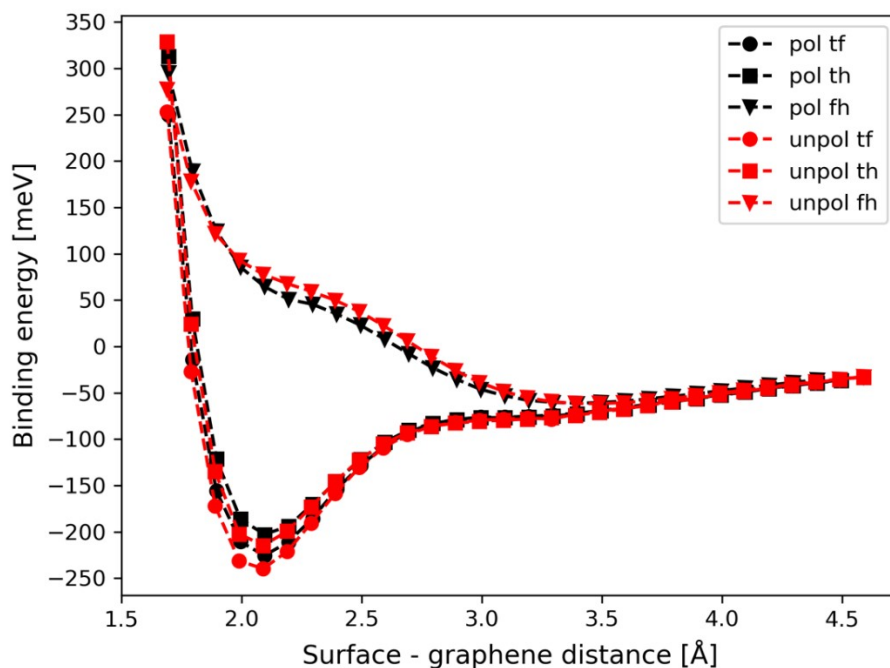

**Figure S3.** Binding energy of graphene to Fe fcc(111) surface as a function of graphene – metal surface distance.

The effect of magnetism was also investigated in NP-nanocap and NP-CNT systems. The calculated binding energies considering both spin-polarized and spin-unpolarized case are shown in **Table S4**. There is a noticeable difference in binding energy between spin-polarized and spin-unpolarized calculation of the same system, varying in the range of 0.2 – 0.7 eV. However, both cases show the same tendency in the change of binding energy considering the different sulfur substitution and content.

**Table S4.** Calculated binding energies of Fe<sub>13</sub> with CNT(5,0) and Fe<sub>55</sub> with CNT(10,0).

| Nanoparticle                    | Binding energy (NP-cap) |           | Binding energy (NP-CNT) |           |
|---------------------------------|-------------------------|-----------|-------------------------|-----------|
|                                 | [eV]                    |           | [eV]                    |           |
|                                 | Spin-unpol.             | Spin-pol. | Spin-unpol.             | Spin-pol. |
| Fe <sub>13</sub>                | -3.64                   | -3.17     | -3.11                   | -2.74     |
| Fe <sub>12</sub>                | -3.27                   | -2.80     | -2.60                   | -2.22     |
| Fe <sub>12</sub> S              | Top                     | -2.67     | -2.05                   | -1.93     |
|                                 | Edge                    | -3.55     | -2.84                   | -2.93     |
|                                 | Bottom                  | -3.72     | -3.00                   | -3.24     |
| Fe <sub>55</sub>                | -3.70                   | -3.17     | -3.81                   | -3.21     |
| Fe <sub>54</sub> S              | -3.72                   | -3.16     | -3.81                   | -3.21     |
| Fe <sub>52</sub> S <sub>3</sub> | -2.86                   | -2.45     | -3.01                   | -2.58     |
| Fe <sub>49</sub> S <sub>6</sub> | -2.01                   | -1.80     | -2.13                   | -1.89     |

### 3. The adsorption of graphene on partially sulfur-covered Fe fcc(111) surfaces

To investigate the effect of partial sulfur coverage on the graphene adsorption, along with the results using the (2x2) Fe fcc(111) orthogonal cell in the main text, we also computed the (4x4) orthogonal cell with three atomic layers. The optimized structure is shown in **Figure S4**. The structure of the surface bound graphene is slightly corrugated, which is energetically favoured, as it somewhat reduces the metal-carbon distances at sulfur-free part of the iron surface (**Figure 2**). However, corrugation is small (only ~ 0.2Å), thus is expected to play a minor role in the FCCVD process.

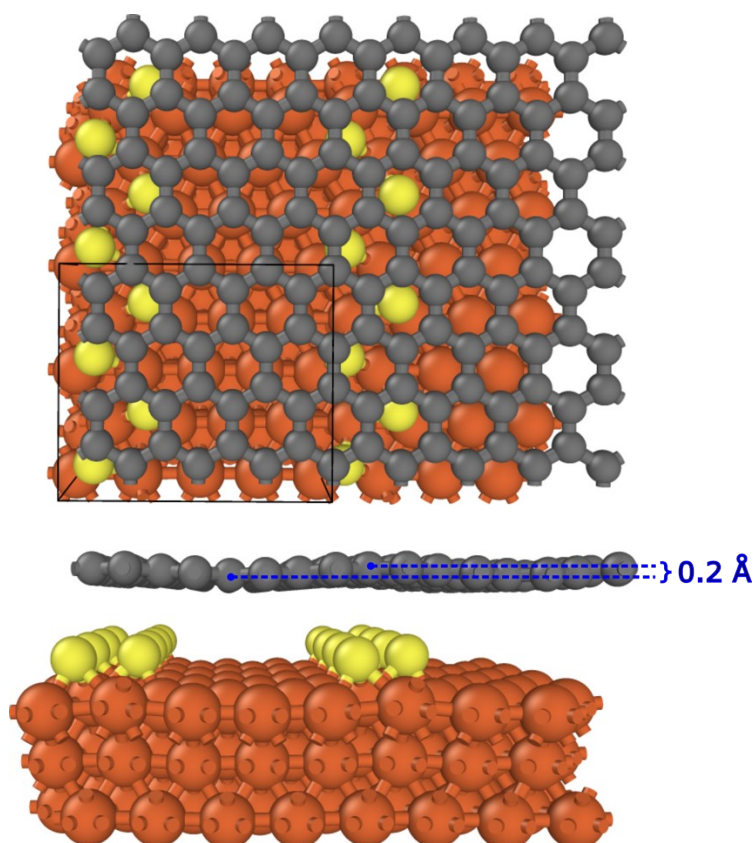

**Figure S4.** Optimized structure of graphene adsorbed on partially sulfur-covered iron surface. Black rectangle represents the applied cell in the computations.

#### 4. Geometry optimization of $\text{Fe}_{55}$ based systems

The geometry optimization was performed using linear combination of atomic orbitals (LCAO) method with triple-zeta basis set (TZP) due to the much lower computational cost and the optimization criterion was set to  $0.02 \text{ eV}/\text{\AA}$  on each atom. For the final energies, single point computations were performed on the optimized geometries using the plane wave basis set and the method described above. Our preliminary calculations showed that the difference between the two optimization methods is relatively small, even the biggest deviation in binding energy of CNT to  $\text{M}_{55}$  is less than  $10^{-3} \text{ eV}$ .

#### 5. Non-covalent interaction (NCI) calculation of $\text{Fe}_{55}$ , $\text{Fe}_{54}\text{S}$ and $\text{Fe}_{49}\text{S}_6$ with nanocap

The non-covalent interaction between CNT(10,0) nanocap and  $\text{Fe}_{55}$ ,  $\text{Fe}_{54}\text{S}$  and  $\text{Fe}_{49}\text{S}_6$  was calculated. The reduced gradient ( $s$ ) as a function of the second eigenvalue of the Hessian ( $\lambda_2$ ) is presented in **Figure S5**.

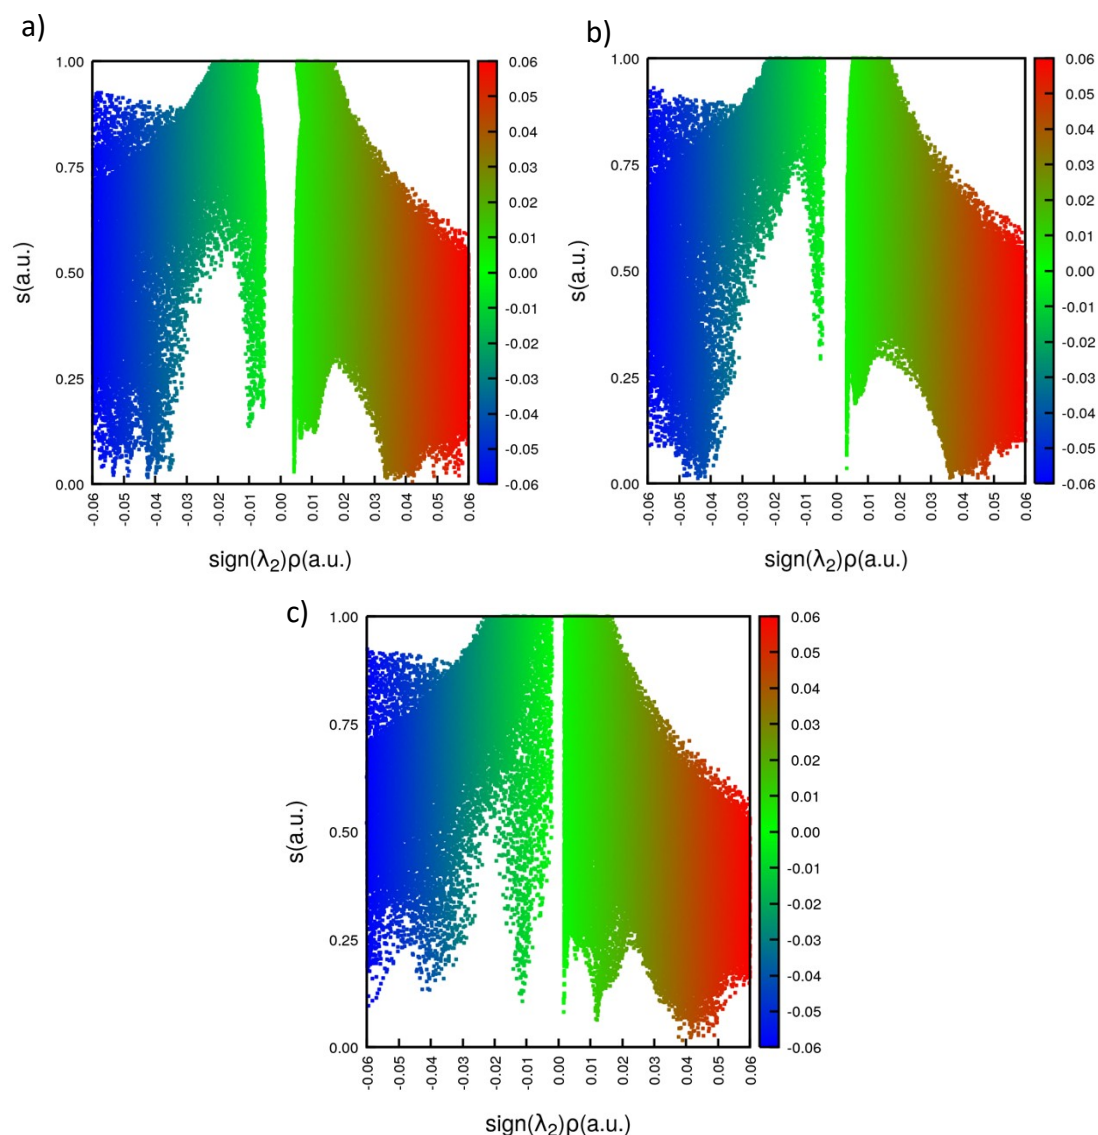

**Figure S5.** NCI plot of nanocap binding to a)  $\text{Fe}_{55}$ , b)  $\text{Fe}_{54}\text{S}$  and c)  $\text{Fe}_{49}\text{S}_6$ .

In comparison of  $\text{Fe}_{55}$  and  $\text{Fe}_{54}\text{S}$  there is only a small difference in the region of weak interaction ( $-0.02 < \lambda_2 < 0.02$ ) which shows the reduction in  $\lambda_2$  in the interaction due to the substitution of top atom (under nanocap) in the NP. However, in case of  $\text{Fe}_{49}\text{S}_6$  there is a significant change in the  $-0.06 < \lambda_2 < -0.03$  region which belongs to the strong and attractive interactions. For  $\text{Fe}_{49}\text{S}_6$  the attractive interaction reduces, indicating a weaker binding of the nanocap to the nanoparticle.

## 6. Molecular Dynamics simulation of $\text{Fe}_{12}\text{S}+\text{nanocap}(5,0)$ and $\text{Fe}_{52}\text{S}_3+\text{nanocap}(10,0)$

We performed Density Functional Theory based molecular dynamics (MD) simulation using the revised PBE functional, D3 dispersion correction and the double-zeta basis set on the  $\text{Fe}_{12}\text{S}$  with nanocap (5,0) (Top configuration) and  $\text{Fe}_{52}\text{S}_3$  with nanocap (10,0). The optimized structures reported in the main text were used as initial structures for the simulation. The simulation timestep was set to 0.5 fs and temperature was kept at 1000 Kelvin. The results are shown in **Figure S6**. We performed geometry optimization from the final step of the molecular dynamics simulation to calculate binding energy ( $E_b$ ) using the original method, as it is described in the main text. (**Figure S6c**).

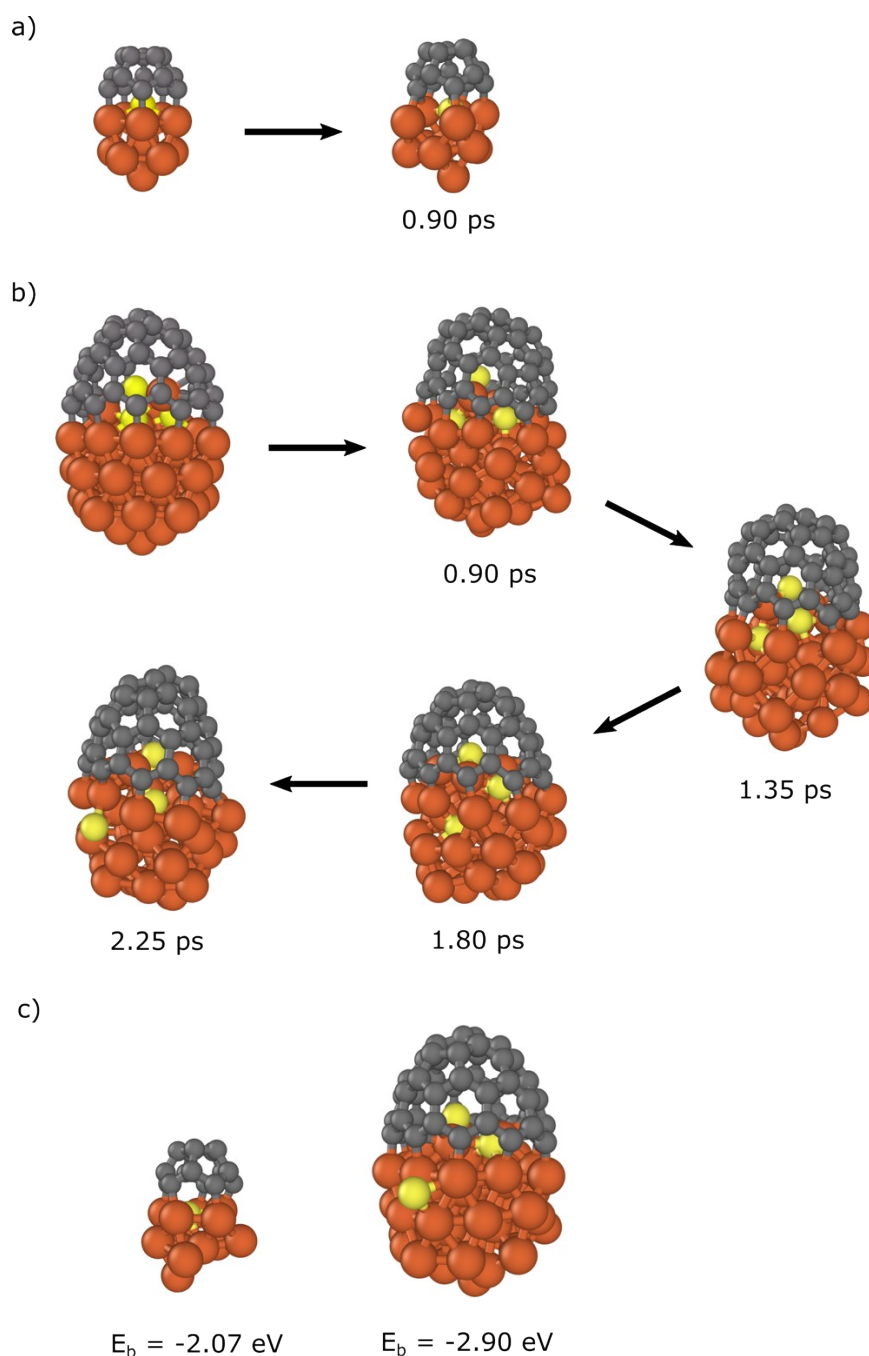

**Figure S6.** Snapshots along the molecular dynamics trajectories of a)  $\text{Fe}_{12}\text{S}+\text{nanocap}(5,0)$  and b)  $\text{Fe}_{52}\text{S}_3+\text{nanocap}(10,0)$  at 1000 Kelvin with simulation timestep of 0.5 fs and c) their optimized structures carried out from the final step.

For  $\text{Fe}_{12}\text{S}+\text{nanocap}(5,0)$  (**Figure S6a**), after 0.90 ps molecular dynamics simulation a similar geometrical structure is observed to the initial configuration (with a sulfur atom under the cap). The binding energy is -2.07 eV with a very small difference compared to that of the initial structure (-2.05 eV). However, in the case of  $\text{Fe}_{52}\text{S}_3+\text{nanocap}(10,0)$  (**Figure S6b**) a sulfur atom migrates from the region under the cap. This can occur due to the molten surface layer of the NP at the temperature used in the simulation. Thus, the binding of nanocap becomes stronger ( $E_b = -2.90 \text{ eV}$ ) compared to the initial structure where three sulfur atoms reside under the cap ( $E_b = -2.45 \text{ eV}$ ). The final optimization reproduced the icosahedral configuration of  $\text{Fe}_{52}\text{S}_3$  that supports the choice of icosahedral structure as model system for iron nanoparticles.



This suggests that sulfur can easily migrate along the molten surface layer of the NP during cap growth, and thus the sulfur content under the cap depends on the sulfur coverage of the whole nanoparticle.

## 7. Atomic positions of the optimized structures

### Graphene in Ni cell

C 2.52342437 3.96993809 6.20682610  
C 1.27772498 1.81155441 6.20693502  
C 2.52343621 1.09201765 6.20652703  
C 1.27772482 3.25040866 6.20703606  
C 5.01487645 3.96996864 6.20702690  
C 3.76919205 1.81151421 6.20661896  
C 5.01488795 1.09197099 6.20672758  
C 3.76919188 3.25043375 6.20671917

### Graphene in Fe cell

C 2.53787400 3.93608500 6.20669900  
C 1.32102900 1.82845200 6.20713400  
C 2.53787400 1.12587200 6.20668000  
C 1.32102900 3.23350600 6.20713300  
C 4.97156500 3.93609000 6.20711300  
C 3.75472200 1.82844800 6.20670400  
C 4.97156600 1.12586800 6.20709600  
C 3.75472300 3.23351000 6.20601000

### Ni(2x2x6) slab

Ni 1.24570400 0.71931500 -0.00014400  
Ni 3.73707300 0.71930700 -0.00024400  
Ni -0.00001000 2.87774300 0.00019900  
Ni 2.49138100 2.87773400 0.00010100  
Ni -0.00008600 1.43903500 2.03402600  
Ni 2.49130500 1.43902600 2.03392600  
Ni 1.24561500 3.59745300 2.03427300  
Ni 3.73698200 3.59744400 2.03417400  
Ni -0.00016200 0.00032800 4.06791300  
Ni 2.49122900 0.00032000 4.06781800  
Ni 1.24553800 2.15874600 4.06816300  
Ni 3.73690600 2.15873800 4.06806300  
Ni 1.24545189 0.72007155 6.10608510  
Ni 3.73684450 0.72006368 6.10598572  
Ni -0.00025043 2.87849840 6.10642787  
Ni 2.49114115 2.87849150 6.10633328  
Ni -0.00031859 1.43990363 8.14425972  
Ni 2.49107294 1.43989510 8.14416092  
Ni 1.24537010 3.59832213 8.14450567  
Ni 3.73676176 3.59831420 8.14440639  
Ni -0.00037950 0.00116032 10.16059484  
Ni 2.49101213 0.00115257 10.16049717  
Ni 1.24530975 2.15957942 10.16084182  
Ni 3.73670048 2.15957143 10.16074270

### Fe(2x2x6) slab

Fe 1.21684183 0.70258924 -0.00470693  
Fe 3.65052362 0.70258924 -0.00470693  
Fe -0.00000009 2.81029120 -0.00466931  
Fe 2.43368291 2.81029173 -0.00466995  
Fe -0.00000022 1.40174107 2.00378749  
Fe 2.43368278 1.40174113 2.00378730  
Fe 1.21684202 3.51984264 2.03364412  
Fe 3.65052358 3.51984264 2.03364412  
Fe -0.00000021 0.04068683 4.01346648  
Fe 2.43368279 0.04068698 4.01346627  
Fe 1.21684191 2.14097882 4.03438995  
Fe 3.65052365 2.14097882 4.03438994  
Fe 1.21684191 0.78598273 6.03643638  
Fe 3.65052366 0.78598273 6.03643638  
Fe -0.00000022 2.88859777 6.06585627  
Fe 2.43368278 2.88859775 6.06585639  
Fe -0.00000022 1.52745079 8.06373815  
Fe 2.43368278 1.52745081 8.06373813  
Fe 1.21684202 3.63403383 8.05639107  
Fe 3.65052354 3.63403383 8.05639106  
Fe -0.00000022 0.13759085 10.12805265  
Fe 2.43368278 0.13759091 10.12805248  
Fe 1.21684205 2.23490307 10.03974917  
Fe 3.65052351 2.23490307 10.03974917

### Fe(2x2x6)S<sub>1</sub> slab

Fe 1.21684183 0.70258924 -0.00470693  
Fe 3.65052362 0.70258924 -0.00470693  
Fe -0.00000009 2.81029120 -0.00466931  
Fe 2.43368291 2.81029173 -0.00466995  
Fe -0.00024480 1.40087159 1.99771985  
Fe 2.43389850 1.40087168 1.99771975  
Fe 1.21682532 3.51789383 2.03075730  
Fe 3.65050681 3.51978081 2.02806356  
Fe -0.00006294 0.03169708 4.01464680  
Fe 2.43370241 0.03169716 4.01464663  
Fe 1.21682040 2.13227768 4.02602057  
Fe 3.65050194 2.13344449 4.02657613  
Fe 1.21681445 0.78179607 6.05091649  
Fe 3.65049574 0.78342585 6.04286171  
Fe 0.00197688 2.88201167 6.03206318  
Fe 2.43165021 2.88201163 6.03206299  
Fe 0.00076618 1.53046724 8.08302880  
Fe 2.43285338 1.53046712 8.08302889  
Fe 1.21681060 3.64065286 8.06416521  
Fe 3.65049203 3.62644693 8.03034108  
Fe -0.00955099 0.15411644 10.03596831  
Fe 2.44316728 0.15411648 10.03596882  
Fe 1.21680970 2.27938569 10.09341381  
Fe 3.65049031 2.29805897 10.05314352  
S 1.21680731 0.81687680 11.72664660

### **Fe(2x2x6)S<sub>2</sub> slab**

Fe 1.21684183 0.70258924 -0.00470693  
Fe 3.65052362 0.70258924 -0.00470693  
Fe -0.00000009 2.81029120 -0.00466931  
Fe 2.43368291 2.81029173 -0.00466995  
Fe -0.00053167 1.40211933 2.00322804  
Fe 2.43292104 1.40214324 2.00177460  
Fe 1.21672689 3.51852154 2.03692985  
Fe 3.65179895 3.52042178 2.03668920  
Fe 0.00288404 0.03902946 4.01935107  
Fe 2.43310471 0.03432953 4.02001537  
Fe 1.21664236 2.13708606 4.03669942  
Fe 3.64798484 2.14184608 4.03639022  
Fe 1.22579565 0.77732249 6.05097988  
Fe 3.65079330 0.79211615 6.04708112  
Fe 0.00015923 2.89710563 6.04832685  
Fe 2.42517254 2.88257022 6.05148850  
Fe 0.01650637 1.51711435 8.03165974  
Fe 2.42657483 1.53073162 8.11161335  
Fe 1.22355231 3.63598707 8.11981922  
Fe 3.63576414 3.62469376 8.03429568  
Fe -0.05715849 0.16680188 9.97269166  
Fe 2.36280548 0.18755510 10.21814374  
Fe 1.28831896 2.29494560 10.21944262  
Fe 3.70608736 2.27296322 9.96897157  
S 0.81925828 0.85835977 11.76179021  
S 2.83616854 2.96855075 11.75940069

### **Fe(2x2x6)S<sub>3</sub> slab**

Fe 1.21684183 0.70258924 -0.00470693  
Fe 3.65052362 0.70258924 -0.00470693  
Fe -0.00000009 2.81029120 -0.00466931  
Fe 2.43368291 2.81029173 -0.00466995  
Fe 0.00075991 1.39804683 1.99997302  
Fe 2.43443949 1.39862775 1.99730718  
Fe 1.21769054 3.51670299 2.03806784  
Fe 3.65144498 3.51670374 2.03806887  
Fe 0.00110123 0.03714629 4.01657251  
Fe 2.43478439 0.03503782 4.02142162  
Fe 1.21789636 2.13592662 4.02804367  
Fe 3.65166812 2.13592830 4.02804503  
Fe 1.22148467 0.78048818 6.05267187  
Fe 3.64866819 0.78048737 6.05267696  
Fe 0.00139436 2.88055937 6.04064740  
Fe 2.43507992 2.87847713 6.03881513  
Fe 0.00154816 1.51251425 8.06509108  
Fe 2.43523186 1.52556199 8.10518370  
Fe 1.21689606 3.61096164 8.02539280  
Fe 3.65355059 3.61096756 8.02539863  
Fe 0.00165247 0.07509821 10.00666738  
Fe 2.43534194 0.10051838 10.07921057  
Fe 1.19315372 2.23095260 10.11903108

Fe 3.67751520 2.23095094 10.11902295  
S 1.09887714 0.81117495 11.77676237  
S 2.43534946 2.93444403 11.79328533  
S 3.77183097 0.81118998 11.77676411

### **Fe(2x2x6)S<sub>4</sub>slab**

Fe 1.21684183 0.70258924 -0.00470693  
Fe 3.65052362 0.70258924 -0.00470693  
Fe -0.00000009 2.81029120 -0.00466931  
Fe 2.43368291 2.81029173 -0.00466995  
Fe 0.00059561 1.41077709 2.04213982  
Fe 2.43427856 1.41077691 2.04213987  
Fe 1.21735419 3.50843785 2.00369065  
Fe 3.65103523 3.50843788 2.00369060  
Fe 0.00069983 0.03234678 4.03966206  
Fe 2.43438282 0.03234658 4.03966204  
Fe 1.21754972 2.14562863 4.02471258  
Fe 3.65123091 2.14562879 4.02471259  
Fe 1.21766931 0.78338487 6.05761431  
Fe 3.65135020 0.78338430 6.05761419  
Fe 0.00082965 2.89442572 6.05706510  
Fe 2.43451254 2.89442648 6.05706503  
Fe 0.00084680 1.52013484 8.06464573  
Fe 2.43453087 1.52013464 8.06464663  
Fe 1.21769046 3.62884184 8.06058505  
Fe 3.65137281 3.62884152 8.06058443  
Fe 0.00081669 0.14130415 10.11620350  
Fe 2.43450287 0.14130488 10.11620386  
Fe 1.21765927 2.24945972 10.11771815  
Fe 3.65134418 2.24945940 10.11771900  
S 1.21766406 0.83687369 11.84829062  
S 2.43450210 2.94493603 11.85001301  
S 3.65134104 0.83687313 11.84830096  
S 0.00081994 2.94493518 11.85002256

### **Graphene on Ni(2x2x6)**

Ni 1.24570400 0.71931500 -0.00014400  
Ni 3.73707300 0.71930700 -0.00024400  
Ni -0.00001000 2.87774300 0.00019900  
Ni 2.49138100 2.87773400 0.00010100  
Ni -0.00008600 1.43903500 2.03402600  
Ni 2.49130500 1.43902600 2.03392600  
Ni 1.24561500 3.59745300 2.03427300  
Ni 3.73698200 3.59744400 2.03417400  
Ni -0.00016200 0.00032800 4.06791300  
Ni 2.49122900 0.00032000 4.06781800  
Ni 1.24553800 2.15874600 4.06816300  
Ni 3.73690600 2.15873800 4.06806300  
Ni 1.24546200 0.72015600 6.10196400  
Ni 3.73682900 0.72014800 6.10186400  
Ni -0.00025200 2.87858300 6.10230700  
Ni 2.49113800 2.87857600 6.10220900  
Ni -0.00032900 1.43987500 8.13612300

Ni 2.49106200 1.43986700 8.13602400  
Ni 1.24536900 3.59829300 8.13637000  
Ni 3.73674100 3.59828500 8.13627000  
Ni -0.00040600 0.00116700 10.16990100  
Ni 2.49098600 0.00115900 10.16980300  
Ni 1.24529400 2.15958500 10.17014900  
Ni 3.73666400 2.15957700 10.17005000  
C 2.52338800 2.86984400 12.3068260000000001  
C 1.27768300 0.71148500 12.3069680000000001  
C 2.52340000 -0.00788600 12.306539  
C 1.27768300 2.15048000 12.307058  
C 5.01491400 2.86990100 12.307052  
C 3.76923300 0.71142200 12.306634  
C 5.01492500 -0.00795900 12.3067640000000001  
C 3.76923300 2.15052800 12.306723

### Graphene on Fe(2x2x6)

Fe 1.21684183 0.70258924 -0.00470693  
Fe 3.65052362 0.70258924 -0.00470693  
Fe -0.00000009 2.81029120 -0.00466931  
Fe 2.43368291 2.81029173 -0.00466995  
Fe 0.00030961 1.40070576 1.99518287  
Fe 2.43399262 1.40070581 1.99518270  
Fe 1.21720540 3.51898881 2.02380341  
Fe 3.65088678 3.51898881 2.02380339  
Fe 0.00048725 0.03110868 4.00304969  
Fe 2.43417030 0.03110867 4.00304963  
Fe 1.21733454 2.13358223 4.02758075  
Fe 3.65101596 2.13358222 4.02758074  
Fe 1.21749245 0.76399854 6.01972550  
Fe 3.65117364 0.76399849 6.01972546  
Fe 0.00063926 2.86414210 6.03124390  
Fe 2.43432232 2.86414198 6.03124396  
Fe 0.00080614 1.48714012 8.04798420  
Fe 2.43448932 1.48714021 8.04798454  
Fe 1.21766443 3.58082088 8.07361060  
Fe 3.65134567 3.58082080 8.07361069  
Fe 0.00088177 0.06457475 10.01564673  
Fe 2.43456476 0.06457507 10.01564837  
Fe 1.21772303 2.16872696 10.01688729  
Fe 3.65140533 2.16872689 10.01688778  
C 2.43474380 2.86154034 12.05819628  
C 1.21790550 0.75363345 12.05208085  
C 2.43474937 0.05124718 12.10481828  
C 1.21791064 2.15930245 12.10712107  
C 4.86842654 2.86153885 12.05819445  
C 3.65158179 0.75363352 12.05207983  
C 4.86843218 0.05124891 12.10481460  
C 3.65158760 2.15930241 12.10712125

### Graphene on Fe(2x2x6)S<sub>1</sub>

Fe 1.21684183 0.70258924 -0.00470693  
Fe 3.65052362 0.70258924 -0.00470693

Fe -0.0000009 2.81029120 -0.00466931  
 Fe 2.43368291 2.81029173 -0.00466995  
 Fe 0.00037462 1.39963743 1.99387278  
 Fe 2.43460614 1.39963467 1.99389751  
 Fe 1.21758861 3.51683023 2.02586767  
 Fe 3.65127131 3.51875194 2.02300285  
 Fe 0.00107493 0.02906061 4.00824695  
 Fe 2.43471711 0.02908954 4.00824571  
 Fe 1.21791498 2.12941618 4.01960339  
 Fe 3.65159506 2.13073974 4.01998302  
 Fe 1.21838995 0.77731952 6.04275205  
 Fe 3.65209597 0.77865095 6.03442431  
 Fe 0.00362058 2.87704072 6.02313843  
 Fe 2.43318817 2.87712973 6.02313021  
 Fe 0.00256126 1.52375233 8.07273943  
 Fe 2.43525933 1.52386589 8.07231633  
 Fe 1.21896254 3.63318149 8.05518116  
 Fe 3.65286616 3.61807184 8.01723110  
 Fe -0.01027911 0.14370475 10.02103676  
 Fe 2.44961626 0.14354306 10.01954373  
 Fe 1.21931531 2.27093755 10.08382253  
 Fe 3.65290130 2.28886962 10.04895665  
 S 1.22181397 0.79509566 11.70421504  
 C 2.52460002 3.98939678 14.74988478  
 C 1.30763069 1.88202032 14.76178983  
 C 2.52459005 1.17919131 14.75456517  
 C 1.30761739 3.28667393 14.75536354  
 C 4.95798208 3.98940215 14.75275639  
 C 3.74135300 1.88153625 14.74783335  
 C 4.95796472 1.17919024 14.75786110  
 C 3.74133872 3.28697428 14.74461747

### Graphene on Fe(2x2x6)S<sub>2</sub>

Fe 1.21684183 0.70258924 -0.00470693  
 Fe 3.65052362 0.70258924 -0.00470693  
 Fe -0.0000009 2.81029120 -0.00466931  
 Fe 2.43368291 2.81029173 -0.00466995  
 Fe 0.00017676 1.39842270 1.99587964  
 Fe 2.43369587 1.39849677 1.99437721  
 Fe 1.21755388 3.51514736 2.02673686  
 Fe 3.65272393 3.51707852 2.02664642  
 Fe 0.00412446 0.03112898 4.00619029  
 Fe 2.43416380 0.02648555 4.00672655  
 Fe 1.21780956 2.12929056 4.02413051  
 Fe 3.64902133 2.13405358 4.02399585  
 Fe 1.22772124 0.76453677 6.03338305  
 Fe 3.65232602 0.77961323 6.02949605  
 Fe 0.00176174 2.88443655 6.03113725  
 Fe 2.42643111 2.86964686 6.03426841  
 Fe 0.01855044 1.49937847 8.01112801  
 Fe 2.42786571 1.51322695 8.09047516  
 Fe 1.22612818 3.61840951 8.09846338  
 Fe 3.63761502 3.60708558 8.01365308  
 Fe -0.05427263 0.14532964 9.94925096

Fe 2.36887149 0.16455377 10.19528247  
Fe 1.28747493 2.27215259 10.19675369  
Fe 3.70803497 2.25148580 9.94483407  
S 0.82508276 0.83035107 11.73754790  
S 2.83754650 2.94045342 11.73526532  
C 2.52728960 4.01393171 14.92767161  
C 1.31027327 1.90623271 14.92911886  
C 2.52726451 1.20354683 14.92550428  
C 1.31028137 3.31126060 14.92777459  
C 4.96068117 4.01376636 14.93447258  
C 3.74438382 1.90606080 14.93221816  
C 4.96064062 1.20360929 14.93600221  
C 3.74439384 3.31132365 14.93363748

### Graphene on Fe(2x2x6)S<sub>3</sub>

Fe 1.21684183 0.70258924 -0.00470693  
Fe 3.65052362 0.70258924 -0.00470693  
Fe -0.00000009 2.81029120 -0.00466931  
Fe 2.43368291 2.81029173 -0.00466995  
Fe 0.00178241 1.39875451 2.00182165  
Fe 2.43545507 1.39931281 1.99915301  
Fe 1.21889875 3.51743160 2.04042178  
Fe 3.65262464 3.51743298 2.04042624  
Fe 0.00275154 0.03854727 4.01938575  
Fe 2.43642732 0.03639988 4.02428283  
Fe 1.21958798 2.13713935 4.03074427  
Fe 3.65331788 2.13714258 4.03076335  
Fe 1.22396170 0.78144430 6.05642501  
Fe 3.65116201 0.78145297 6.05648897  
Fe 0.00390548 2.88158827 6.04429490  
Fe 2.43760149 2.87955577 6.04261903  
Fe 0.00486009 1.51241202 8.06884080  
Fe 2.43848904 1.52563036 8.10994713  
Fe 1.22015722 3.61127425 8.02984217  
Fe 3.65688059 3.61132764 8.02987947  
Fe 0.00591075 0.07284828 10.01201773  
Fe 2.43965763 0.09807321 10.08410992  
Fe 1.19692477 2.22850259 10.12427658  
Fe 3.68219534 2.22836760 10.12388213  
S 1.10354751 0.80804248 11.78388614  
S 2.44029351 2.92987838 11.79721236  
S 3.77668773 0.80824809 11.78384564  
C 2.48207770 4.09994232 15.01671288  
C 1.26521965 1.99201364 15.01569366  
C 2.48204709 1.28931352 15.01703741  
C 1.26521972 3.39715600 15.01374942  
C 4.91579813 4.09962556 15.01176696  
C 3.69901087 1.99199959 15.01450426  
C 4.91576239 1.28960983 15.01469191  
C 3.69894900 3.39715811 15.01243480

### Graphene on Fe(2x2x6)S<sub>4</sub>

Fe 1.21684183 0.70258924 -0.00470693

Fe 3.65052362 0.70258924 -0.00470693  
Fe -0.00000009 2.81029120 -0.00466931  
Fe 2.43368291 2.81029173 -0.00466995  
Fe 0.00262230 1.40412580 2.03107761  
Fe 2.43630540 1.40412566 2.03107752  
Fe 1.21907795 3.50190597 1.99536165  
Fe 3.65275906 3.50190598 1.99536165  
Fe 0.00353455 0.01990164 4.02616587  
Fe 2.43721777 0.01990167 4.02616585  
Fe 1.22034522 2.13282631 4.01056474  
Fe 3.65402657 2.13282632 4.01056472  
Fe 1.22196475 0.76359847 6.03889551  
Fe 3.65564595 0.76359847 6.03889546  
Fe 0.00514027 2.87466202 6.03824537  
Fe 2.43882353 2.87466202 6.03824533  
Fe 0.00636054 1.49380086 8.04173041  
Fe 2.44004396 1.49380087 8.04173034  
Fe 1.22319891 3.60260445 8.03788285  
Fe 3.65688038 3.60260445 8.03788286  
Fe 0.00846797 0.10686004 10.08979161  
Fe 2.44215128 0.10686016 10.08979142  
Fe 1.22531380 2.21497744 10.09116467  
Fe 3.65899553 2.21497746 10.09116466  
S 1.22574453 0.80020266 11.82333075  
S 2.44258828 2.90826619 11.82464874  
S 3.65942709 0.80020265 11.82333080  
S 0.00890533 2.90826577 11.82464744  
C 2.49777536 4.07090775 15.05038089  
C 1.28093151 1.96320976 15.05034309  
C 2.49776503 1.26051893 15.05061007  
C 1.28091918 3.36821775 15.05066564  
C 4.93145328 4.07090848 15.05038091  
C 3.71461857 1.96321071 15.05034292  
C 4.93144286 1.26051819 15.05061009  
C 3.71460623 3.36821685 15.05066551

### Fe<sub>13</sub>

Fe 2.11738288 2.11732818 2.11721463  
Fe 4.12509514 2.11731364 0.87645130  
Fe 4.12505427 2.11731685 3.35810198  
Fe 0.10964792 2.11732887 0.87640951  
Fe 0.10970877 2.11732097 3.35810761  
Fe 0.87642997 4.12504154 2.11716220  
Fe 3.35813651 4.12507990 2.11716618  
Fe 0.87642290 0.10963112 2.11715164  
Fe 3.35816217 0.10958553 2.11717191  
Fe 2.11738038 0.87635378 4.12478097  
Fe 2.11737733 3.35816474 4.12481135  
Fe 2.11734922 0.87633978 0.10968880  
Fe 2.11734112 3.35818920 0.10966575

### Fe<sub>12</sub>

Fe 3.90852518 4.01727492 5.70613343



Fe 6.12482566 4.01698532 6.41551537  
Fe 3.98129390 4.01743534 3.22468485  
Fe 1.80693956 4.01719546 4.33819896  
Fe 3.28548950 6.05330372 4.38163774  
Fe 4.58010139 6.14432333 6.36970258  
Fe 3.28577401 1.98138578 4.38164847  
Fe 4.58049721 1.88999806 6.36956093  
Fe 2.08105411 2.70255061 6.29630870  
Fe 2.08073014 5.33160159 6.29618907  
Fe 5.67815020 2.75910572 4.45193226  
Fe 5.67796631 5.27556604 4.45215544

### **Fe<sub>12</sub>S**

Fe 3.91637103 4.51764282 4.85728275  
Fe 6.03851406 4.51842281 5.89140739  
S 3.84722771 4.51736462 7.16123346  
Fe 3.98636289 4.51767618 2.52931783  
Fe 1.77763677 4.51849977 3.73642074  
Fe 3.27816527 6.58355407 3.78294720  
Fe 4.55249786 6.56336745 5.84730689  
Fe 3.27654304 2.45233437 3.78273945  
Fe 4.55404188 2.47236581 5.84735134  
Fe 2.14812664 3.25135078 5.77212273  
Fe 2.14717714 5.78238263 5.77222373  
Fe 5.70339515 3.24012778 3.85623166  
Fe 5.70445210 5.79356865 3.85625066

### **Fe<sub>13</sub> with nanocap(5,0)**

Fe 3.95018047 4.01021334 5.37777209  
Fe 6.09004860 3.97218024 6.40581418  
Fe 3.96358522 4.00789920 7.66021452  
Fe 3.94303070 4.01193410 2.94902470  
Fe 1.84957779 4.04632921 4.24583141  
Fe 3.33059454 6.01554429 4.24073238  
Fe 4.64922013 6.02785026 6.41649423  
Fe 3.26347253 2.02824830 4.23757679  
Fe 4.57863846 1.96774376 6.41268911  
Fe 2.20703948 2.78588815 6.42770786  
Fe 2.25092306 5.29280418 6.43005496  
Fe 5.62168282 2.74917229 4.22765667  
Fe 5.66324423 5.21568382 4.22967634  
C 4.63733266 5.95167246 8.41533203  
C 6.02351674 3.97051603 8.40503658  
C 2.32500988 5.24550010 8.42832411  
C 2.28180232 2.82829240 8.42605357  
C 4.56748820 2.04008163 8.41162482  
C 5.57458398 5.12793755 9.17816273  
C 3.40027453 5.87759181 9.19188153  
C 2.01535558 4.04132624 9.19825529  
C 3.33381554 2.15680022 9.18835666  
C 5.53347866 2.82838405 9.17597172  
C 3.62005703 5.18094575 10.45369107  
C 2.74979459 4.02700056 10.45765964

C 4.98643175 4.70983253 10.44509178  
C 4.96060737 3.26471669 10.44373662  
C 3.57827834 2.84268485 10.45151077

### **Fe<sub>13</sub> with nanocap(3,3)**

Fe 7.57143192 7.43358886 10.95354870  
Fe 9.89988070 7.60854720 11.88970848  
Fe 7.89330738 7.40263086 13.24260598  
Fe 7.47332286 7.37333070 8.55837323  
Fe 5.34349167 7.33358039 9.97982138  
Fe 6.71645812 9.33466003 9.78300672  
Fe 8.13864007 9.55517263 11.95000130  
Fe 6.87002411 5.48108938 9.97305932  
Fe 8.58609493 5.47960874 11.83013700  
Fe 5.73815620 6.41331741 12.30989505  
Fe 5.87912893 8.78870971 12.05866479  
Fe 9.37384382 6.43622079 9.68517390  
Fe 9.17760001 8.84279630 9.83506093  
C 5.22149086 7.78132268 13.81943636  
C 5.77325703 9.10304515 13.88462553  
C 6.77715285 5.48068943 13.74989711  
C 5.52363446 7.15067874 15.10011409  
C 6.35114300 5.96367563 15.06158201  
C 8.22890357 5.42117784 13.73996824  
C 9.67672261 8.20373872 13.78587607  
C 9.30539527 7.41828255 14.98916744  
C 8.65383576 6.09955805 14.98459721  
C 8.75804111 9.34393701 13.79667907  
C 6.53610217 9.25939535 15.10256310  
C 7.98085233 9.32503327 15.03442954  
C 6.20010014 8.11862761 15.94924273  
C 8.52061680 8.27026362 15.89226995  
C 7.42523684 7.51228762 16.40109869  
C 7.51382303 6.16681651 15.90425125

### **Fe<sub>12</sub> with nanocap(5,0)**

Fe 3.95371878 4.01044317 5.48843885  
Fe 6.04604789 3.97943509 6.47140546  
Fe 3.94110615 4.01317028 3.00762286  
Fe 1.85817976 4.02706736 4.29886828  
Fe 3.31580617 6.00325187 4.29357352  
Fe 4.63198353 5.98349668 6.48303713  
Fe 3.28723999 2.02977871 4.28854477  
Fe 4.57664362 2.01605395 6.47701203  
Fe 2.25452537 2.80721245 6.49183396  
Fe 2.28869950 5.25966021 6.49486093  
Fe 5.62911724 2.77145279 4.27710916  
Fe 5.64638259 5.22793664 4.28025308  
C 4.67766382 5.99942837 8.40336642  
C 6.08801382 3.95069780 8.39179539  
C 5.58362374 5.10921435 9.11048527  
C 2.29374642 5.29324223 8.41592156  
C 3.42186711 5.87465242 9.12439552

C 2.23063222 2.80858440 8.41269592  
C 2.02666046 4.05596755 9.12993309  
C 4.57638861 1.97917279 8.39758943  
C 3.32833335 2.16831632 9.11884453  
C 5.52728664 2.81738018 9.10791755  
C 3.63566241 5.17447571 10.38634524  
C 2.76198763 4.03588833 10.39036003  
C 4.99153724 4.69404965 10.37687831  
C 4.95679952 3.25853808 10.37701399  
C 3.57860540 2.85233028 10.38187630

### **Fe<sub>12</sub> with nanocap(3,3)**

Fe 7.44441849 7.48266653 11.05254997  
Fe 9.54758394 7.54072267 12.09404740  
Fe 7.46264112 7.44555372 8.53093630  
Fe 5.36778257 7.37726355 9.84732551  
Fe 6.79994166 9.42304147 9.76330809  
Fe 8.11098659 9.49206952 12.07872791  
Fe 6.77765417 5.49745588 9.86519954  
Fe 8.24039966 5.51628416 11.99412271  
Fe 5.79937550 6.29249235 12.23516706  
Fe 5.78508407 8.84482155 11.94103879  
Fe 9.14783180 6.27967923 9.81683552  
Fe 9.14124579 8.72961369 9.89258080  
C 5.37752140 7.79274583 13.63683608  
C 5.88598730 9.12848815 13.76602665  
C 7.06887226 5.44346425 13.67040634  
C 5.66180669 7.12577040 14.89555242  
C 6.50744036 5.94722314 14.91224152  
C 8.49205711 5.49074684 13.82529492  
C 9.65927579 8.19707417 13.91029610  
C 9.37589030 7.44733973 15.11316926  
C 8.81104001 6.12232563 15.07750951  
C 8.82592045 9.34651759 13.88256768  
C 6.57258843 9.24641444 15.02601948  
C 8.00894944 9.35129813 15.07843105  
C 6.19526493 8.08696966 15.83195300  
C 8.52018871 8.29193674 15.95286831  
C 7.40719966 7.50315496 16.35315554  
C 7.57568640 6.15944304 15.86150977

### **Fe<sub>12</sub>S Top with nanocap(5,0)**

Fe 3.88622829 3.98369833 5.15437164  
Fe 6.07263761 3.97864438 6.39949981  
S 3.93347630 3.99271203 7.29984819  
Fe 3.84675876 4.00450343 2.92843216  
Fe 1.71893522 4.10745897 4.33037193  
Fe 3.23840441 6.05451897 4.26167087  
Fe 4.60563388 6.03377468 6.42948856  
Fe 3.17498536 2.03805409 4.21444084  
Fe 4.54786054 1.93211051 6.42556451  
Fe 2.15341235 2.75255027 6.48249533  
Fe 2.19701671 5.29859068 6.49145634

Fe 5.62117897 2.76815439 4.24186400  
Fe 5.59494246 5.26310990 4.20777687  
C 4.65903851 6.03309983 8.43854563  
C 6.12477572 3.95968742 8.40167594  
C 5.59002803 5.12369347 9.12595157  
C 2.23379460 5.28455920 8.49589828  
C 3.39785332 5.87026421 9.17942883  
C 2.19982319 2.74594844 8.48959546  
C 2.01111752 4.01617103 9.20840489  
C 4.60232097 1.92735420 8.43138998  
C 3.34575100 2.12356102 9.17166536  
C 5.55755383 2.80865262 9.12204753  
C 3.64939505 5.14941512 10.42236563  
C 2.79087559 4.00204588 10.44064903  
C 5.00557971 4.68775777 10.38950426  
C 4.98579854 3.25475849 10.38740879  
C 3.61695621 2.83097693 10.41844772

### **Fe<sub>12</sub>S Top with nanocap(3,3)**

Fe 7.52094307 7.50710608 10.76816153  
Fe 9.73899691 7.62829089 11.97032661  
S 7.49457778 7.64415677 12.90797890  
Fe 7.49525298 7.53304622 8.50910388  
Fe 5.37318859 7.37152380 9.90852349  
Fe 6.69840661 9.50020189 9.98455722  
Fe 8.28854739 9.51158081 12.00210813  
Fe 6.93129236 5.42035961 9.84461911  
Fe 8.42368492 5.58245033 12.00317400  
Fe 6.05371279 5.94454654 12.08325886  
Fe 5.68098143 8.43907604 12.15563410  
Fe 9.28280582 6.31565736 9.73414146  
Fe 9.22179639 8.81537284 9.78216876  
C 5.03892695 7.95350528 13.90886210  
C 5.68223604 9.20143059 13.91371508  
C 6.82674566 5.29025281 13.83359971  
C 5.53066009 7.19480171 15.04973715  
C 6.35071888 5.99191873 15.01869244  
C 8.28477482 5.29400438 13.88944162  
C 9.75919036 8.18468490 13.87186304  
C 9.35444815 7.39374407 15.02610014  
C 8.68882617 6.08843731 15.03430956  
C 8.93427952 9.40180685 13.86458898  
C 6.59495410 9.28698131 15.04738715  
C 8.05885421 9.35106738 15.02603519  
C 6.24083563 8.15531897 15.89577559  
C 8.55061471 8.27209394 15.87434726  
C 7.43825323 7.54905214 16.39201412  
C 7.50985096 6.22205785 15.87946636

### **Fe<sub>12</sub>S Edge with nanocap(5,0)**

Fe 4.06688461 4.00636384 5.28515425  
Fe 3.90838297 4.00559142 7.59081572  
Fe 3.65093039 4.01779380 2.90359431

Fe 1.78956331 4.04840564 4.36998219  
Fe 3.30879453 6.10192925 4.30468670  
Fe 4.80609482 5.91409656 6.44322695  
Fe 3.23582667 1.94222291 4.29645106  
Fe 4.73282302 2.06762844 6.43623038  
Fe 2.29517735 2.72430986 6.37262725  
Fe 2.34350655 5.34833819 6.37761797  
Fe 5.41733956 2.69223705 3.95991403  
Fe 5.46270463 5.27568578 3.96358843  
S 6.23452772 3.95959457 6.84475506  
C 4.68276817 5.93967470 8.44303172  
C 6.08852610 3.95982546 8.62308377  
C 5.58992705 5.14100537 9.28823167  
C 2.34444989 5.26516319 8.34263115  
C 3.40695918 5.87494190 9.15141403  
C 2.29561275 2.80410706 8.33781671  
C 2.02263192 4.03918161 9.08815580  
C 4.60522962 2.03809927 8.43498411  
C 3.33286937 2.14988902 9.14409931  
C 5.54322046 2.79687801 9.28339802  
C 3.54512269 5.17899970 10.42248555  
C 2.67709499 4.02364307 10.37703183  
C 4.90108849 4.70475005 10.48995299  
C 4.87233587 3.25468836 10.48678066  
C 3.49851907 2.83432117 10.41801585

### **Fe<sub>12</sub>S Edge with nanocap(3,3)**

Fe 7.44627465 7.66610035 11.04567593  
Fe 9.81779772 7.63525911 11.89672179  
Fe 7.79173300 7.69220789 13.32752807  
Fe 7.32823205 7.37561724 8.60400106  
Fe 5.36079253 7.72574921 10.26848979  
Fe 7.06165053 9.49376225 9.46400880  
Fe 8.35882596 9.68423202 11.80940997  
Fe 6.65226608 5.62884976 10.08640631  
Fe 8.38114316 5.62156369 11.94777908  
Fe 5.98667396 6.00421735 12.39500794  
S 6.00556621 9.31390910 11.95103673  
Fe 9.13885487 6.36370853 9.76968437  
Fe 9.27883951 8.72850786 9.72908013  
C 5.29121094 7.27144975 13.73786949  
C 5.82138021 8.59986022 13.57762580  
C 6.79339672 5.24367379 13.98332856  
C 5.51716527 6.92907016 15.12819156  
C 6.37533512 5.78426519 15.27040723  
C 8.19566307 5.51295928 13.85564889  
C 9.70924447 8.20756684 13.79906158  
C 9.28705479 7.49269326 15.01494303  
C 8.67162924 6.16584253 15.07340361  
C 8.82463791 9.40362354 13.71173248  
C 6.46866793 9.05120975 14.82622229  
C 7.92228313 9.29677263 14.87171708  
C 6.13806762 8.05732235 15.82349449  
C 8.46262590 8.36289244 15.86672874

C 7.38345182 7.59107545 16.38624712  
C 7.55335250 6.20664556 16.01123297

### **Fe<sub>12</sub>S Bottom with nanocap(5,0)**

Fe 3.81329831 4.00834053 5.01398152  
Fe 3.90588551 4.00405011 7.50491794  
Fe 1.52423376 4.02482303 4.55752505  
Fe 3.10630511 6.16281245 4.48500708  
Fe 4.47466576 6.06088039 6.40061836  
Fe 3.02435401 1.84310323 4.50695504  
Fe 4.41294710 1.92756517 6.39782164  
Fe 2.06326205 2.74469012 6.48375970  
Fe 2.10705066 5.31988193 6.47309361  
Fe 5.63395907 2.50136956 4.45347619  
Fe 5.77788563 5.47250925 4.54380917  
Fe 6.01185733 3.95284951 6.34139974  
S 5.10334970 4.08110194 2.99866585  
C 4.62128523 5.96105410 8.34463724  
C 6.01277041 3.97369675 8.29262046  
C 5.59100170 5.13732040 9.06824776  
C 2.31244988 5.24927903 8.43171297  
C 3.40976439 5.88913758 9.15459306  
C 2.27406799 2.81322175 8.43781918  
C 2.04649378 4.03688632 9.20214705  
C 4.56193089 2.03381778 8.34849631  
C 3.35401496 2.14451698 9.15953974  
C 5.55597628 2.82718473 9.07265665  
C 3.68154195 5.18362031 10.40001037  
C 2.81633596 4.02731853 10.43547355  
C 5.04687474 4.71742450 10.34555244  
C 5.02559659 3.26754901 10.34966334  
C 3.64697409 2.84486288 10.40399300

### **Fe<sub>12</sub>S Bottom with nanocap(3,3)**

Fe 7.47282265 7.36135140 10.61390305  
Fe 9.77936257 7.38477582 11.89187998  
Fe 7.65152731 7.58346752 13.07070611  
S 8.16765225 8.22822225 8.48528171  
Fe 5.07611398 7.22441206 10.23153995  
Fe 6.64609856 9.36569461 9.78864650  
Fe 8.10521346 9.55043088 11.80691451  
Fe 6.60057368 5.23929695 10.33386943  
Fe 8.41529254 5.48070350 11.89172996  
Fe 5.79716505 6.24740047 12.33856064  
Fe 5.75845799 8.72493391 11.87398429  
Fe 9.39542140 6.52715331 9.67400511  
Fe 9.54188576 8.91631136 10.08166682  
C 5.29144908 7.53898372 13.83842877  
C 5.89082328 8.84198579 13.75219887  
C 6.72779469 5.45899962 13.89737204  
C 5.53779791 7.07922482 15.20053555  
C 6.35933704 5.90116060 15.23245643  
C 8.15481851 5.55967273 13.78600230

C 9.58813108 8.11716622 13.68598740  
C 9.32819783 7.45217221 14.96959042  
C 8.67059022 6.15291361 15.02461854  
C 8.73406390 9.29689225 13.65321917  
C 6.57395798 9.16793311 14.99138603  
C 8.02135061 9.32863475 14.94001456  
C 6.23342564 8.13687964 15.94599955  
C 8.59563161 8.35040898 15.84676546  
C 7.48662793 7.58430910 16.37642560  
C 7.58214578 6.20879184 15.97797104

### **Fe<sub>13</sub> with CNT(5,0)**

Fe 3.92058494 4.51171304 4.92409581  
Fe 6.04501438 4.56005413 5.96803054  
Fe 3.90691359 4.50754048 7.41457767  
Fe 3.95850732 4.51865660 2.49607548  
Fe 1.83178306 4.47101892 3.77554912  
Fe 3.23720901 6.49853524 3.78928523  
Fe 4.51760892 6.55444962 5.96643325  
Fe 3.31847006 2.50392198 3.78242958  
Fe 4.61432407 2.49610340 5.96150490  
Fe 2.21575169 3.21757477 5.95643923  
Fe 2.15535153 5.71789021 5.95941689  
Fe 5.65982793 3.30815189 3.80214749  
Fe 5.61055085 5.78899352 3.80658403  
C 5.93790726 4.56580759 7.93290658  
C 4.58865877 2.59158339 7.92782331  
C 5.59392465 3.35090472 8.68774684  
C 4.47606235 6.45859153 7.93219215  
C 5.52346044 5.75706957 8.69036019  
C 2.22557679 5.65317504 7.92693403  
C 3.21364632 6.43371616 8.68734200  
C 2.29524421 3.26462100 7.92423858  
C 1.85724171 4.44616984 8.68284983  
C 3.32735708 2.54135361 8.68306760  
C 5.52530885 5.75921056 10.09610402  
C 5.59650687 3.34644864 10.09345544  
C 5.93065359 4.56314108 10.81658050  
C 3.20901393 6.43734026 10.09328623  
C 4.47018988 6.45339354 10.81672241  
C 1.84920012 4.44396182 10.08900826  
C 2.22187404 5.64847103 10.81284394  
C 3.32386918 2.53414025 10.08907691  
C 2.29227691 3.26164904 10.81033066  
C 4.58406480 2.59044911 10.81260961  
C 4.47426152 6.47274988 12.22228054  
C 5.95067652 4.56264924 12.22196340  
C 5.51798651 5.75388247 12.94048630  
C 2.20183537 5.65894039 12.21869834  
C 3.20648772 6.42985353 12.93883013  
C 2.27341725 3.24647208 12.21616758  
C 1.84968697 4.44034379 12.93520746  
C 4.59000632 2.56860379 12.21819511  
C 3.32229554 2.53501572 12.93476529

C 5.58967961 3.34657716 12.93807137  
C 3.19893744 6.44512470 14.35936894  
C 5.53062770 5.76352462 14.36088977  
C 4.44034329 6.36408085 15.08872877  
C 1.83052103 4.43813268 14.35595874  
C 2.28980923 5.59375206 15.08590078  
C 3.31626794 2.51631593 14.35534682  
C 2.35817090 3.31040962 15.08361105  
C 5.60326663 3.33524560 14.35841786  
C 4.55076384 2.66951614 15.08493757  
C 5.83760347 4.55685756 15.08817196  
C 2.88487282 5.18607063 16.35659195  
C 2.92776307 3.75017478 16.35520005  
C 4.23718585 5.67066131 16.35846977  
C 5.11607161 4.53411521 16.35817950  
C 4.30663403 3.34724609 16.35603977

### **Fe<sub>13</sub> with CNT(3,3)**

Fe 7.51176113 7.39897455 7.84620464  
Fe 9.69780783 7.66791013 8.86552503  
Fe 7.60776563 7.41180813 10.22642229  
Fe 7.38510121 7.35156390 5.47852604  
Fe 5.36682832 7.28834786 6.88059137  
Fe 6.50214601 9.36004723 6.97683766  
Fe 8.09104325 9.47146221 8.85586390  
Fe 7.10862704 5.31109885 6.74378605  
Fe 8.48871184 5.45471507 8.93522675  
Fe 6.06105109 5.89468652 8.87326070  
Fe 5.69875435 8.43909543 9.22006634  
Fe 9.36707595 6.28487488 6.79430926  
Fe 8.97978745 8.74746372 6.61525685  
C 5.48186364 7.07040841 10.76011505  
C 6.23869664 5.88498879 10.78476250  
C 8.96640569 5.93506549 10.78161972  
C 9.59699187 7.21616737 10.78253082  
C 6.57583271 9.33476077 10.78809152  
C 7.97434172 9.43382545 10.79317674  
C 5.31912406 7.73725542 12.04643455  
C 5.94736099 9.02855788 12.06240105  
C 6.88217305 5.47498766 12.02067519  
C 5.39314317 6.97845485 13.25330348  
C 6.21389192 5.78257949 13.24549160  
C 8.31500745 5.53944604 12.02362875  
C 9.50666681 7.97578683 12.02493375  
C 8.92416358 5.94190730 13.25928408  
C 9.56125054 7.24368646 13.26096163  
C 8.68769128 9.15335322 12.03128129  
C 6.59122119 9.41618763 13.27320139  
C 8.03946185 9.49006147 13.26237308  
C 5.36235826 7.69587470 14.50034659  
C 5.99890066 8.98820449 14.51060724  
C 6.86636855 5.45755772 14.48445850  
C 5.38331337 6.94774730 15.72482829  
C 6.19228890 5.74693324 15.71604238



C 8.30495361 5.54796387 14.48803565  
C 9.49385539 7.96570724 14.49648547  
C 8.93629972 5.93017107 15.71976185  
C 9.57245985 7.22352966 15.72433375  
C 8.68988285 9.16151338 14.50116332  
C 6.59944285 9.41674394 15.74015576  
C 8.04419234 9.50884192 15.73453792  
C 5.34227924 7.68394771 16.94865298  
C 5.98514491 8.98966852 16.95666816  
C 6.86486677 5.41710964 16.93643934  
C 5.60522017 7.07758251 18.22404687  
C 6.41007486 5.87663275 18.21654574  
C 8.31781063 5.50996098 16.93999060  
C 9.52320614 7.95966850 16.95135647  
C 9.34972504 7.32317092 18.22339278  
C 8.71109708 6.02470044 18.21769701  
C 8.71024042 9.16731969 16.95529646  
C 6.61989222 9.14082458 18.23590669  
C 8.06267692 9.23613281 18.23357091  
C 6.23312822 8.04517668 19.09521081  
C 8.59315971 8.19982104 19.09382073  
C 7.46165069 7.43867162 19.54687551  
C 7.55132097 6.08155544 19.08379810

#### **Fe<sub>12</sub> with CNT(5,0)**

Fe 3.92075022 4.51092283 4.97354709  
Fe 5.96872266 4.54653547 6.02585478  
Fe 3.93230226 4.51446156 2.48457431  
Fe 1.83868556 4.48874824 3.78158103  
Fe 3.25755484 6.48901884 3.78805289  
Fe 4.51526481 6.47214117 6.02416635  
Fe 3.30200995 2.52128735 3.78414081  
Fe 4.58604821 2.56985444 6.02038978  
Fe 2.27978852 3.27374248 6.01533879  
Fe 2.23567232 5.68471913 6.01759099  
Fe 5.62729191 3.30431272 3.79246555  
Fe 5.60001036 5.75800298 3.79483975  
C 5.92457513 4.56846452 7.94437444  
C 4.59197487 2.60781220 7.93952589  
C 5.57549621 3.37062655 8.68049957  
C 4.47129191 6.44166331 7.94265217  
C 5.50092435 5.74069429 8.68240212  
C 2.24111465 5.63781382 7.93680184  
C 3.22370857 6.40185599 8.67790174  
C 2.31598016 3.26891375 7.93489445  
C 1.89106301 4.44052079 8.67326551  
C 3.34452354 2.56689684 8.67493790  
C 5.50869428 5.74816942 10.09330974  
C 5.58410087 3.36175216 10.09143211  
C 5.93796236 4.56686645 10.81955433  
C 3.21571192 6.41364826 10.08883223  
C 4.47017274 6.45801906 10.81799323  
C 1.87414219 4.43863106 10.08425095  
C 2.21814987 5.64634549 10.81247771

C 3.33781303 2.55227336 10.08585576  
 C 2.29387886 3.25377715 10.81066481  
 C 4.59281325 2.58663398 10.81501036  
 C 4.47218273 6.47471261 12.22159429  
 C 5.95360712 4.56658651 12.22315550  
 C 5.51955903 5.75945031 12.94082464  
 C 2.19976634 5.65544866 12.21615504  
 C 3.20207469 6.43157622 12.93654802  
 C 2.27656510 3.24116810 12.21436079  
 C 1.84666796 4.43526659 12.93213827  
 C 4.59647706 2.56821202 12.21866977  
 C 3.32642958 2.52934629 12.93368385  
 C 5.59639203 3.34769738 12.93903075  
 C 3.19424231 6.44392306 14.35597100  
 C 5.52790724 5.76724600 14.36022195  
 C 4.43533312 6.36621363 15.08688261  
 C 1.82959904 4.43361001 14.35161339  
 C 2.28547040 5.59091822 15.08186440  
 C 3.31972923 2.51447211 14.35312535  
 C 2.35848861 3.30669661 15.08020384  
 C 5.60543852 3.33863594 14.35846456  
 C 4.55341385 2.67020224 15.08418611  
 C 5.83699045 4.56108699 15.08835335  
 C 2.88062469 5.18426215 16.35436210  
 C 2.92657371 3.74882463 16.35327116  
 C 4.23165287 5.67146772 16.35749979  
 C 5.11257627 4.53708157 16.35845330  
 C 4.30586845 3.34881735 16.35581233

**Fe<sub>12</sub> with CNT(3,3)**

Fe 7.22967207 7.25585356 8.14281078  
 Fe 9.42054960 7.36087938 9.05100615  
 Fe 7.16511555 7.20001087 5.64390735  
 Fe 5.10819302 7.34130415 6.95890625  
 Fe 6.57132298 9.24209428 6.94229883  
 Fe 8.04076724 9.29817756 9.04145271  
 Fe 6.62754543 5.21477077 6.96687767  
 Fe 8.00035239 5.39402704 9.26150980  
 Fe 5.41211319 5.95993550 8.90598796  
 Fe 5.71727746 8.59481818 9.24956886  
 Fe 8.90004371 5.98349127 6.95491105  
 Fe 8.91383784 8.45395778 6.85494052  
 C 5.75354028 7.07908230 10.60013944  
 C 6.57395731 5.92623569 10.60561827  
 C 9.20554181 6.19105455 10.77347501  
 C 9.82464489 7.41864764 10.88418833  
 C 6.86706576 9.48103147 10.75818445  
 C 8.22962944 9.66266360 10.87347312  
 C 5.59433070 7.74429510 11.88712693  
 C 6.19136290 9.02547021 11.96095727  
 C 7.14344362 5.56582958 11.89799743  
 C 5.57763253 6.98106398 13.10489724  
 C 6.41104577 5.80885470 13.11067545  
 C 8.54908326 5.70979072 11.97749297

C 9.70278069 8.15485243 12.10783060  
C 9.09662176 6.08208801 13.25606361  
C 9.70033639 7.38462268 13.32888756  
C 8.87962757 9.31260292 12.10195965  
C 6.71729338 9.42861853 13.23916951  
C 8.14549684 9.57107280 13.31777239  
C 5.44841174 7.67140414 14.35482277  
C 6.05383496 8.97907545 14.42722590  
C 7.01443431 5.46858653 14.36610795  
C 5.43271317 6.89400647 15.56245716  
C 6.26904716 5.71759106 15.56837210  
C 8.44804553 5.61118438 14.44426988  
C 9.57805879 8.06497122 14.58349723  
C 9.00372027 5.97777390 15.71553612  
C 9.60675998 7.28852942 15.78907757  
C 8.74208057 9.24067687 14.57744211  
C 6.57668613 9.39222681 15.69795005  
C 8.01251224 9.53141235 15.77746036  
C 5.30883595 7.59869011 16.80353120  
C 5.91258050 8.91812837 16.87472135  
C 6.88763635 5.37764582 16.81507567  
C 5.51647543 6.96738557 18.07603587  
C 6.35332882 5.79020852 18.08204777  
C 8.33180166 5.51458513 16.89233439  
C 9.46378161 7.99080500 17.02859480  
C 9.24111659 7.31876432 18.27830149  
C 8.64198315 6.00671601 18.20502234  
C 8.62270529 9.17414949 17.02251007  
C 6.47288834 9.05837314 18.18921519  
C 7.90863327 9.19337661 18.26851994  
C 6.07330187 7.93015844 19.00267379  
C 8.42214417 8.15201582 19.13272330  
C 7.28881655 7.34851751 19.50730653  
C 7.44101873 6.00600594 19.01257167

### **Fe<sub>12</sub>S Top with CNT(5,0)**

Fe 3.91584273 4.50840709 4.64499396  
Fe 6.04841160 4.56613044 6.01278507  
Fe 3.94421239 4.51692462 2.42431639  
Fe 1.77500814 4.45388673 3.81875104  
Fe 3.21223577 6.54255606 3.82739301  
Fe 4.51850490 6.55460975 6.01107862  
Fe 3.31839433 2.44430401 3.82321893  
Fe 4.63093017 2.49600012 6.00761400  
Fe 2.22190305 3.20441031 6.00263929  
Fe 2.15267250 5.71368243 6.00468687  
Fe 5.70138289 3.29117570 3.83090477  
Fe 5.63707468 5.81935047 3.83384682  
S 3.91121565 4.50594250 6.78488950  
C 6.00063722 4.56583190 7.97155106  
C 4.61267398 2.53485037 7.96635244  
C 5.58384049 3.35914817 8.69658724  
C 4.49741996 6.51307097 7.96989378  
C 5.51463946 5.74521817 8.69875854

C 2.18100425 5.68544184 7.96352888  
C 3.22381616 6.41660458 8.69403925  
C 2.25211421 3.22667797 7.96135527  
C 1.87719713 4.44554890 8.68901009  
C 3.33576458 2.55576416 8.69055066  
C 5.51152793 5.74415671 10.10845724  
C 5.58080563 3.35761858 10.10631436  
C 5.93662466 4.56158432 10.83558183  
C 3.22027953 6.41542156 10.10392189  
C 4.47449545 6.45539541 10.83417319  
C 1.87362784 4.44401704 10.09898220  
C 2.22149586 5.65019602 10.82851065  
C 3.33244587 2.55410486 10.10045930  
C 2.29088051 3.25859657 10.82638018  
C 4.58699773 2.58598452 10.83069235  
C 4.47680001 6.47236819 12.23575024  
C 5.95280557 4.56088042 12.23705742  
C 5.52868013 5.75950792 12.95494184  
C 2.20271948 5.65952065 12.23016882  
C 3.20422185 6.44040142 12.95077926  
C 2.27294296 3.24555657 12.22800975  
C 1.83815742 4.44026622 12.94609687  
C 4.59059840 2.56667110 12.23225806  
C 3.31840498 2.52310796 12.94728910  
C 5.59927186 3.33839056 12.95275612  
C 3.19781041 6.44947174 14.36523840  
C 5.53469593 5.76499001 14.36934762  
C 4.44299192 6.37329574 15.09651425  
C 1.82454273 4.43860393 14.36056774  
C 2.28038815 5.60006161 15.09143658  
C 3.31272331 2.51116497 14.36171701  
C 2.34743143 3.30443460 15.08939078  
C 5.60573422 3.33087224 14.36716068  
C 4.55141195 2.65868440 15.09316601  
C 5.84667238 4.55536651 15.09763335  
C 2.88026737 5.18771091 16.35023165  
C 2.92233106 3.74896179 16.34888523  
C 4.23561475 5.67226171 16.35345383  
C 5.11533735 4.53292202 16.35415118  
C 4.30358085 3.34422807 16.35134849

### **Fe<sub>12</sub>S Top with CNT(3,3)**

Fe 7.53730515 7.44893134 7.70706194  
Fe 9.72928095 7.59199851 8.93396260  
S 7.51398767 7.34712114 9.82956960  
Fe 7.43812837 7.36825027 5.43656407  
Fe 5.40075661 7.36316057 6.84374748  
Fe 6.81728634 9.47715361 6.77331658  
Fe 8.26578530 9.50957038 8.91696134  
Fe 6.83898559 5.34477143 7.02427922  
Fe 8.49199866 5.56667368 8.99206698  
Fe 5.82667170 6.31078262 9.12978136  
Fe 5.96382885 8.85017162 9.01273344  
Fe 9.26375369 6.24888365 6.72255926

Fe 9.18460741 8.72437081 6.63689192  
C 5.19305089 6.71720139 10.90331538  
C 6.00201088 5.60441680 10.90968825  
C 9.13683627 5.83421623 10.85025950  
C 9.76962990 7.11322441 10.84628733  
C 6.52649082 9.50090148 10.82168563  
C 7.92799084 9.68341209 10.83444819  
C 5.30523152 7.61177646 12.02445606  
C 5.93965522 8.89549111 12.00408014  
C 6.89188127 5.38741444 12.02123581  
C 5.42776441 6.89769083 13.28648845  
C 6.25737511 5.73084651 13.28563903  
C 8.32155404 5.52373303 12.01056721  
C 9.47143973 7.96985814 11.98609212  
C 8.89477960 5.96778981 13.26793379  
C 9.49879171 7.26049216 13.25390559  
C 8.63853865 9.13770245 11.98080834  
C 6.55563824 9.29236359 13.25649507  
C 7.97793034 9.41537349 13.24480605  
C 5.34601551 7.61672736 14.52119933  
C 5.95614535 8.92567508 14.50369040  
C 6.90010390 5.40647959 14.52381275  
C 5.39073959 6.88529066 15.74975126  
C 6.22473994 5.69771096 15.75102064  
C 8.33831572 5.53434183 14.51283493  
C 9.48081521 7.98373034 14.48862183  
C 8.97321319 5.94120640 15.72953580  
C 9.58376049 7.25591689 15.71579182  
C 8.64921687 9.16262722 14.48364699  
C 6.55390820 9.38659011 15.71988559  
C 7.99752085 9.51356410 15.70846430  
C 5.34531820 7.63843283 16.96354033  
C 5.95795851 8.95906012 16.94871238  
C 6.91526687 5.40273581 16.96818364  
C 5.62882002 7.05517018 18.24336000  
C 6.45972113 5.87063426 18.24625071  
C 8.36491969 5.53089932 16.95703662  
C 9.51437154 8.00729706 16.93177845  
C 9.35988041 7.38476623 18.21405634  
C 8.75089795 6.07330872 18.22821959  
C 8.67738128 9.19833409 16.92767962  
C 6.59570908 9.14292952 18.22009998  
C 8.03599463 9.26971483 18.20853266  
C 6.23821979 8.04881675 19.09877041  
C 8.59388438 8.25666735 19.07935706  
C 7.48055556 7.47579879 19.54632185  
C 7.59898471 6.11036537 19.10361748

### **Fe<sub>12</sub>S Edge with CNT(5,0)**

Fe 4.08723530 4.51745337 4.88506903  
Fe 3.99372894 4.50331822 7.45505241  
Fe 3.62511646 4.52600533 2.43886535  
Fe 1.80317018 4.45771917 3.92084489  
Fe 3.18399385 6.57252437 3.86048583

Fe 4.65470787 6.48527932 5.94986172  
Fe 3.30174835 2.43431221 3.83457638  
Fe 4.75551236 2.57193744 5.93999465  
Fe 2.39462857 3.20116337 5.95768105  
Fe 2.32438958 5.72629569 5.96380458  
Fe 5.42421432 3.27919273 3.42986265  
Fe 5.35301096 5.85790562 3.44930032  
S 6.12757475 4.56116786 6.24500000  
C 5.96148857 4.55228623 8.02785882  
C 4.62716562 2.55107482 7.92460150  
C 5.60505612 3.31638982 8.72084696  
C 4.52942178 6.48397639 7.93030745  
C 5.54582786 5.76747213 8.72394681  
C 2.33066173 5.66904599 7.91723115  
C 3.26570653 6.50193075 8.69411615  
C 2.39129166 3.25208342 7.91397398  
C 2.00123217 4.45067929 8.65897650  
C 3.36652146 2.46585096 8.69040806  
C 5.52630161 5.75380379 10.12894663  
C 5.58491663 3.32649687 10.12705892  
C 5.89967884 4.54784657 10.84862371  
C 3.24167062 6.50325642 10.09072931  
C 4.49736596 6.49613767 10.83736859  
C 1.96769347 4.44920628 10.07495587  
C 2.27366326 5.66385447 10.79645708  
C 3.34217674 2.46152061 10.08775175  
C 2.33366618 3.25112846 10.79550375  
C 4.59544424 2.53270011 10.83562434  
C 4.48539714 6.50267509 12.23923720  
C 5.90568992 4.54764007 12.25373264  
C 5.49786263 5.74930683 12.96598512  
C 2.22761538 5.66928068 12.19944353  
C 3.20018036 6.47728805 12.94245090  
C 2.28782891 3.24392644 12.19908394  
C 1.88349964 4.44738914 12.90011312  
C 4.58361156 2.52512827 12.23836385  
C 3.29883296 2.48563869 12.94281440  
C 5.55608623 3.32818662 12.96567315  
C 3.17591398 6.48363719 14.35173589  
C 5.49085816 5.75787985 14.38576466  
C 4.41256978 6.38899923 15.09861681  
C 1.83606790 4.44652311 14.32333421  
C 2.26358082 5.60707382 15.06154774  
C 3.27436336 2.47862343 14.35246326  
C 2.31961983 3.30912655 15.06192752  
C 5.54926992 3.31967706 14.38614951  
C 4.50465442 2.63565785 15.09971937  
C 5.77793426 4.54494466 15.11933630  
C 2.82849897 5.19704886 16.33521990  
C 2.86469063 3.74878428 16.33512822  
C 4.18106892 5.66596294 16.34842190  
C 5.06408904 4.52768502 16.38124650  
C 4.23809620 3.34678121 16.34950410

**Fe<sub>12</sub>S Edge with CNT(3,3)**

Fe 7.51779568 7.09721137 7.90027447  
Fe 9.62206198 7.11213027 9.02510807  
Fe 7.62244169 7.43537215 10.28818295  
Fe 7.50685127 7.64969039 5.46349045  
Fe 5.29294204 7.55286089 6.94135373  
Fe 6.88342533 9.34027766 7.00053282  
Fe 8.32189671 9.26082586 8.88413476  
Fe 6.39736056 5.71210432 6.09484583  
S 7.34405815 4.70387191 7.81177097  
Fe 5.79272560 6.01248498 8.94857420  
Fe 5.85638037 8.53404755 9.17774217  
Fe 9.05043147 5.93457862 6.73280638  
Fe 9.34926816 8.33542723 6.87588887  
C 5.55870443 7.01378349 10.74203760  
C 6.40810182 5.88644289 10.77978226  
C 9.15232383 6.18382189 10.84414182  
C 9.75667057 7.42072451 10.91164952  
C 6.60494057 9.34843669 10.82549552  
C 7.99116549 9.49412105 10.83703318  
C 5.36748073 7.68357919 12.02362262  
C 5.95168756 8.99622567 12.07327155  
C 7.07585910 5.50998748 12.00121204  
C 5.47532340 6.91348820 13.22507650  
C 6.36940780 5.76783335 13.22131381  
C 8.51321354 5.66566685 12.02774474  
C 9.61634490 8.18994600 12.11971088  
C 9.07485381 6.08845254 13.28748305  
C 9.64710305 7.42150861 13.33205555  
C 8.69393906 9.29480853 12.09628773  
C 6.54903454 9.40744299 13.29921933  
C 7.99152604 9.57031618 13.31492998  
C 5.38931111 7.61479658 14.47700346  
C 5.95573841 8.93642587 14.51841902  
C 7.02124888 5.47297368 14.46557221  
C 5.43013857 6.85387673 15.69520441  
C 6.30441742 5.70511259 15.68879415  
C 8.45245002 5.64241323 14.50003237  
C 9.49965787 8.11953792 14.57472765  
C 9.03182750 6.03890209 15.75421775  
C 9.59487219 7.36641313 15.79445977  
C 8.62981975 9.26432015 14.56752289  
C 6.50396180 9.38123739 15.76713006  
C 7.93769728 9.55891719 15.79390259  
C 5.31360357 7.56960963 16.92805389  
C 5.88425478 8.90951549 16.96605966  
C 6.96438337 5.39148095 16.91964133  
C 5.58148933 6.96091723 18.19820611  
C 6.45464032 5.80777545 18.19242090  
C 8.41030956 5.56857684 16.95456497  
C 9.47737239 8.08289523 17.02449211  
C 9.30825769 7.42033902 18.28562046  
C 8.74381871 6.09025627 18.24663865  
C 8.59716897 9.24338811 17.02372295  
C 6.48214141 9.07892508 18.25820515

C 7.91701108 9.25500526 18.28835565  
C 6.13945820 7.95032316 19.09559913  
C 8.48471044 8.24004276 19.14815898  
C 7.38645280 7.40933641 19.57018310  
C 7.56335486 6.06934162 19.08787732

**Fe<sub>12</sub>S Bottom with CNT(5,0)**

Fe 3.91990571 4.50894728 4.86518099  
Fe 3.91090258 4.50590341 7.39050700  
Fe 1.84464519 4.46181295 3.72889134  
Fe 3.23799453 6.47577981 3.73411316  
Fe 4.51567049 6.55927849 5.96989459  
Fe 3.33062212 2.51623400 3.72951378  
Fe 4.62864950 2.49160542 5.96614641  
Fe 2.21914928 3.20287290 5.96077511  
Fe 2.14883499 5.71393713 5.96305143  
Fe 5.64025555 3.32618183 3.74062503  
Fe 5.58273422 5.77454416 3.74265877  
Fe 6.05199645 4.56650613 5.97179676  
S 3.93580781 4.51414407 2.38107156  
C 5.93359195 4.56482829 7.94532125  
C 4.59126870 2.59805383 7.94022808  
C 5.59748380 3.35087126 8.70019943  
C 4.47776976 6.44938173 7.94371148  
C 5.52636481 5.75543811 8.70231525  
C 2.23591622 5.64714636 7.93758113  
C 3.21779602 6.43135820 8.69786147  
C 2.30593755 3.26706645 7.93542112  
C 1.86204488 4.44445500 8.69289777  
C 3.33245119 2.54094613 8.69439715  
C 5.52895124 5.75850154 10.10876309  
C 5.60036214 3.34547916 10.10658500  
C 5.93480387 4.56231706 10.82945156  
C 3.21222524 6.43690392 10.10411492  
C 4.47359577 6.45391739 10.82805612  
C 1.85157214 4.44292681 10.09910276  
C 2.22322198 5.64881260 10.82236946  
C 3.32731245 2.53265063 10.10067452  
C 2.29355356 3.25975510 10.82029265  
C 4.58745774 2.58824088 10.82464996  
C 4.47654206 6.47277760 12.23316260  
C 5.95293454 4.56164490 12.23467001  
C 5.51971640 5.75337424 12.95250991  
C 2.20274595 5.65935791 12.22727916  
C 3.20752066 6.43034869 12.94812523  
C 2.27382014 3.24547236 12.22514987  
C 1.84938217 4.44038508 12.94324139  
C 4.59156089 2.56705530 12.22973668  
C 3.32227415 2.53378445 12.94466534  
C 5.59084247 3.34514491 12.95048361  
C 3.19852868 6.44559192 14.36828138  
C 5.53051020 5.76279252 14.37284757  
C 4.43913036 6.36372801 15.09912154  
C 1.82878118 4.43861496 14.36335073



C 2.28804603 5.59430395 15.09353733  
C 3.31429795 2.51563368 14.36484202  
C 2.35541949 3.31073033 15.09158478  
C 5.60223657 3.33393251 14.37073338  
C 4.54791549 2.66879624 15.09584842  
C 5.83572574 4.55572068 15.10054897  
C 2.88123821 5.18639057 16.36505233  
C 2.92342412 3.75051124 16.36388007  
C 4.23371506 5.67022957 16.36861564  
C 5.11183518 4.53338086 16.36949755  
C 4.30205696 3.34703602 16.36649276

### **Fe<sub>12</sub>S Bottom with CNT(3,3)**

Fe 7.34858439 7.44859775 7.63222179  
Fe 9.56322435 7.61088782 8.81226135  
Fe 7.53480761 7.51417968 10.14443319  
S 8.38626019 6.83198769 5.55004754  
Fe 5.09202639 7.51712045 7.09706584  
Fe 6.49065963 9.63552806 7.16282241  
Fe 8.11272411 9.55900193 8.84104035  
Fe 6.98601523 5.30578460 6.90725356  
Fe 7.97798047 5.39000351 9.15286664  
Fe 5.64954923 6.08775642 8.88153138  
Fe 5.65510847 8.62122148 9.19208000  
Fe 9.34943583 5.82264023 7.26739749  
Fe 9.00482965 8.74824445 6.70841093  
C 5.53121912 7.04527028 10.71809866  
C 6.34952876 5.88167584 10.72959349  
C 8.93919219 6.01667500 10.74783988  
C 9.55034545 7.28560316 10.74708214  
C 6.57720574 9.38444044 10.78243701  
C 7.97355925 9.49139463 10.78793044  
C 5.36105703 7.71058926 12.00904716  
C 5.95287024 9.01699782 12.04629589  
C 6.94473694 5.46728112 11.99227522  
C 5.42691686 6.94772638 13.21662514  
C 6.26066970 5.75942317 13.20926258  
C 8.37230498 5.56033755 12.01270944  
C 9.51066508 8.02869967 12.00764228  
C 8.98019768 5.97071295 13.23431335  
C 9.59071696 7.29059387 13.23473029  
C 8.68154652 9.19400232 12.02441496  
C 6.57822727 9.41171326 13.26488714  
C 8.02699404 9.51381036 13.25721276  
C 5.37960924 7.65732155 14.46731572  
C 5.99124008 8.95997323 14.49219660  
C 6.92295886 5.44626195 14.44712090  
C 5.41231385 6.90293536 15.69068024  
C 6.23970426 5.71942630 15.67968284  
C 8.35930954 5.56290187 14.45910927  
C 9.50422348 8.00201500 14.47889600  
C 8.97863317 5.94967094 15.69449409  
C 9.59158274 7.25500264 15.70505494  
C 8.67901412 9.18150727 14.49189671

C 6.58282019 9.38816546 15.72733091  
C 8.02102814 9.50875835 15.72678874  
C 5.35036820 7.63029741 16.92161533  
C 5.96974328 8.94638216 16.94116814  
C 6.91294396 5.39278726 16.90099120  
C 5.61802452 7.02113410 18.19400235  
C 6.44483627 5.83564886 18.18310130  
C 8.36212521 5.51332640 16.90912661  
C 9.52202281 7.98237281 16.93680639  
C 9.35430124 7.33560924 18.20672433  
C 8.74074724 6.02766663 18.19315971  
C 8.68926345 9.17453657 16.94816195  
C 6.59496335 9.10568200 18.22267688  
C 8.03569480 9.22556762 18.22488623  
C 6.22722596 7.99527904 19.07286397  
C 8.58033359 8.19344835 19.08071819  
C 7.46191027 7.41019116 19.52935017  
C 7.57800826 6.05728772 19.05581771

### Fe<sub>55</sub>

Fe 3.45383220 3.45387878 3.45234591  
Fe 5.39899616 3.45402983 2.25071892  
Fe 5.39896035 3.45425207 4.65424351  
Fe 1.50879940 3.45461872 2.25076598  
Fe 1.50875560 3.45479450 4.65417599  
Fe 2.25260921 5.39947621 3.45246589  
Fe 4.65664516 5.39893410 3.45240687  
Fe 2.25206539 1.50890656 3.45237690  
Fe 4.65637530 1.50893517 3.45242944  
Fe 3.45391570 2.25162445 5.39726037  
Fe 3.45414595 4.65628942 5.39722261  
Fe 3.45405981 2.25186577 1.50724407  
Fe 3.45435799 4.65629419 1.50741150  
Fe 7.45618545 3.45289192 0.97925703  
Fe 7.48014821 3.45475386 3.45253877  
Fe 7.45590975 3.45340573 5.92603410  
Fe -0.54941584 3.45405206 0.97995822  
Fe -0.57294531 3.45564852 3.45253751  
Fe -0.54966218 3.45445456 5.92486477  
Fe 0.98076388 7.45790869 3.45218172  
Fe 3.45473016 7.48003863 3.45212855  
Fe 5.92791570 7.45716247 3.45219308  
Fe 0.98052070 -0.54944743 3.45251033  
Fe 3.45448190 -0.57271840 3.45239427  
Fe 5.92716328 -0.54957315 3.45273302  
Fe 3.45352254 0.97915577 7.45496260  
Fe 3.45360518 3.45329595 7.47864827  
Fe 3.45375847 5.92685330 7.45598075  
Fe 3.45369545 0.97951841 -0.55040130  
Fe 3.45351853 3.45344394 -0.57450715  
Fe 3.45392931 5.92687219 -0.55123529  
Fe 5.46704955 2.20883440 6.70923794  
Fe 5.46672231 4.69773524 6.70900765  
Fe 5.46716492 2.20900385 0.19519860

Fe 5.46688870 4.69752125 0.19557281  
Fe 1.44027184 2.20937456 6.70886215  
Fe 1.44024533 4.69798401 6.70895411  
Fe 1.44019407 2.20925639 0.19577469  
Fe 1.44019248 4.69798812 0.19591376  
Fe 6.71119901 5.46751492 2.20849472  
Fe 6.71133945 5.46747779 4.69616439  
Fe 0.19666505 5.46832502 2.20862985  
Fe 0.19664077 5.46824681 4.69625747  
Fe 6.71098359 1.43997763 2.20880965  
Fe 6.71115206 1.44036903 4.69602650  
Fe 0.19621410 1.44061499 2.20884040  
Fe 0.19631707 1.44109188 4.69591892  
Fe 2.21032479 6.71168667 5.46571011  
Fe 4.69790971 6.71217985 5.46545324  
Fe 2.21002621 0.19529137 5.46516013  
Fe 4.69775134 0.19523406 5.46549525  
Fe 2.21024092 6.71119145 1.43899710  
Fe 4.69826406 6.71168155 1.43898009  
Fe 2.20993931 0.19564771 1.43980371  
Fe 4.69797755 0.19578701 1.43952123

#### **Fe<sub>54</sub>S**

Fe 3.45396041 3.55199791 3.44822688  
Fe 5.39903007 4.15387484 2.41167333  
Fe 5.39513564 2.95352255 4.50702310  
Fe 1.50910092 4.15296685 2.41193240  
Fe 1.51328280 2.95277333 4.50675374  
Fe 2.25439180 5.23394590 4.43707162  
Fe 4.65275914 5.23435856 4.43680003  
Fe 2.25211855 1.86749965 2.48220571  
Fe 4.65700898 1.86814217 2.48198363  
Fe 3.45509236 1.54302677 4.54830113  
Fe 3.45396545 3.62191343 5.77522853  
Fe 3.45397203 3.48275496 1.17207298  
Fe 3.45362382 5.56566255 2.36876633  
Fe 7.45842870 4.79078856 1.30823876  
Fe 7.47530664 3.54653369 3.46238796  
Fe 7.48105026 2.30978716 5.62737179  
Fe -0.55012040 4.78929319 1.30802382  
Fe -0.56752464 3.54447192 3.46245393  
Fe -0.57444033 2.30731268 5.62542884  
Fe 0.96375135 7.04186391 5.48151151  
Fe 3.45261885 7.04640047 5.46619226  
Fe 5.94055899 7.04310937 5.48176989  
Fe 0.97878567 0.08530031 1.44719752  
Fe 3.45393346 0.05862298 1.44422869  
Fe 5.92835992 0.08538637 1.44620331  
Fe 3.45644623 -0.61811124 5.71167902  
Fe 3.45541145 1.48004177 6.90021149  
S 3.44995100 3.68416531 8.01049561  
Fe 3.45604357 3.41047893 -1.23191656  
Fe 3.45343812 5.57187286 -0.03540765  
Fe 3.45417982 7.69671079 1.21836191

Fe 5.47244466 0.84132698 5.65224506  
Fe 5.52062405 2.98257445 6.85843284  
Fe 5.47502910 4.10525757 0.00846693  
Fe 5.47068455 6.26350884 1.25446091  
Fe 1.43842026 0.84136972 5.65162997  
Fe 1.38558311 2.98096353 6.85725154  
Fe 1.43274207 4.10399334 0.00828509  
Fe 1.43640057 6.26287730 1.25469721  
Fe 6.70317477 5.92252342 3.38945038  
Fe 6.71543941 4.67725149 5.53823336  
Fe 0.20378875 5.92117260 3.38904808  
Fe 0.19047049 4.67563827 5.53725569  
Fe 6.71747226 2.43023813 1.37307334  
Fe 6.71426393 1.19573141 3.53057959  
Fe 0.19076739 2.42961782 1.37305200  
Fe 0.19539302 1.19365754 3.53079448  
Fe 2.17482108 5.41088230 6.78246736  
Fe 4.72927299 5.41144017 6.78271914  
Fe 2.21782253 -0.27430032 3.57607869  
Fe 4.69152381 -0.27321527 3.57523453  
Fe 2.20400972 7.37340279 3.34476475  
Fe 4.70284503 7.37421751 3.34464007  
Fe 2.20558745 1.72980670 0.08090470  
Fe 4.70283300 1.73005373 0.08113604

### **Fe<sub>52</sub>S<sub>3</sub>**

Fe 3.44085395 3.59849283 3.40691485  
Fe 5.41559022 4.16328855 2.39892320  
Fe 5.36018221 2.98825563 4.53604870  
Fe 1.51628558 4.15266969 2.31108032  
Fe 1.49775240 2.98171909 4.42029482  
Fe 2.21025342 5.32398886 4.18526934  
Fe 4.66206707 5.27444393 4.35282725  
Fe 2.26287292 1.87913430 2.46543112  
Fe 4.65905903 1.89333434 2.51067515  
Fe 3.45038638 1.60449855 4.57501902  
Fe 3.22414392 3.96903148 5.81614279  
Fe 3.48975605 3.46549619 1.15345174  
Fe 3.48369361 5.57731090 2.26694197  
Fe 7.51397692 4.79103608 1.35654808  
Fe 7.48790198 3.62463905 3.50236136  
Fe 7.14390377 2.44948880 5.79227886  
Fe -0.52654765 4.79457853 1.21787442  
Fe -0.54174105 3.66753131 3.44079507  
Fe -0.56510568 2.48479595 5.60624779  
Fe 1.00236456 7.03019960 5.37709324  
Fe 3.40244347 6.85165936 5.50919125  
Fe 5.81759857 7.10015631 5.46716077  
Fe 0.98363336 0.06369597 1.49167874  
Fe 3.43762057 0.07917235 1.43048444  
Fe 5.95873356 0.07376366 1.54251316  
Fe 3.44121468 -0.24055615 5.85861078  
S 2.65184994 1.02069625 7.62031308  
Fe 4.48376225 2.23204142 6.76446821

Fe 3.53695101 3.32696685 -1.26545393  
Fe 3.48169230 5.53867075 -0.11226568  
Fe 3.47402295 7.69103735 1.12205682  
Fe 5.67218372 0.57383080 5.45790025  
S 6.21676769 3.62122082 7.54815570  
Fe 5.50655624 4.11619840 0.00091564  
Fe 5.50179503 6.26878574 1.23254728  
Fe 1.33445424 0.93289141 5.64593162  
Fe 1.51505720 2.90463316 6.92021589  
Fe 1.48289389 4.09400476 -0.06697406  
Fe 1.45541860 6.27232640 1.20197879  
Fe 6.69064194 5.97847797 3.36425368  
Fe 6.67804899 4.80982176 5.54296575  
Fe 0.15102514 5.96018465 3.30782314  
Fe 0.43471329 4.69553491 5.58369669  
Fe 6.73357644 2.46565611 1.36489589  
Fe 6.76074652 1.27664779 3.47500035  
Fe 0.20120731 2.43151043 1.34792391  
Fe 0.16600241 1.25788353 3.49982428  
S 2.12654434 5.54552891 7.07549504  
Fe 4.78123901 5.29797052 6.85842810  
Fe 2.15704512 -0.24238657 3.60724505  
Fe 4.61554923 -0.27702375 3.51598855  
Fe 2.22106838 7.46070248 3.25817228  
Fe 4.62056032 7.40292052 3.32281229  
Fe 2.21250750 1.73026804 0.06921410  
Fe 4.73872869 1.71225114 0.10852046

### **Fe<sub>49</sub>S<sub>6</sub>**

Fe 3.45694611 3.55745031 3.57825170  
Fe 5.39544286 4.15551371 2.53013901  
Fe 5.43748852 2.94405673 4.65148208  
Fe 1.51968522 4.15552337 2.52896071  
Fe 1.47598504 2.94474128 4.65179717  
Fe 2.23141696 5.27552861 4.58178556  
Fe 4.68138435 5.27572927 4.58161252  
Fe 2.25891288 1.87899345 2.59642049  
Fe 4.65505066 1.87780964 2.59719405  
Fe 3.45607148 1.50691833 4.69168715  
Fe 3.45701027 3.63223928 6.01077925  
Fe 3.45900142 3.48840978 1.30484769  
Fe 3.45744279 5.56243747 2.48644278  
Fe 7.44355315 4.78410146 1.29631273  
Fe 7.49793474 3.57271445 3.43246357  
Fe 7.78663614 2.19879073 5.27471305  
Fe -0.52701476 4.78421517 1.29297560  
Fe -0.58383484 3.57380830 3.42932817  
Fe -0.87755191 2.20175474 5.27201808  
Fe 0.77605327 7.29391369 5.11445867  
Fe 3.45485278 7.11023911 5.41284733  
Fe 6.13675119 7.29272368 5.11715869  
Fe 0.98938055 0.10174309 1.43835056  
Fe 3.45538951 0.07393295 1.48530399  
Fe 5.92023756 0.09975246 1.43764639

Fe 3.45261970 -0.94788264 5.36503886  
S 3.45146757 0.70564683 6.82113370  
S 3.45006725 3.68309317 8.12279519  
Fe 3.46162193 3.41111974 -1.14774557  
Fe 3.45944148 5.54987509 0.04563894  
Fe 3.45919037 7.67787100 1.20577261  
Fe 5.50787664 0.78555862 5.60171172  
S 6.25830142 2.72997362 6.76842045  
Fe 5.45713991 4.09973407 0.09256746  
Fe 5.46640303 6.25371090 1.30052827  
Fe 1.40011756 0.78709299 5.60116806  
S 0.64936360 2.72906684 6.76799097  
Fe 1.46360994 4.09967452 0.09138725  
Fe 1.44978015 6.25379320 1.29795896  
Fe 6.73825193 5.90903132 3.36066223  
Fe 6.77456835 4.69282983 5.49130257  
Fe 0.17583160 5.90950809 3.35854122  
Fe 0.13555002 4.69291467 5.48821612  
Fe 6.70849604 2.43473268 1.41734793  
Fe 6.71415738 1.16004268 3.50456071  
Fe 0.20594977 2.43602768 1.41420172  
Fe 0.19757418 1.16315065 3.50324381  
S 1.71805099 6.04709751 6.66773348  
S 5.18768299 6.04731044 6.66880967  
Fe 2.18590171 -0.28189886 3.54503148  
Fe 4.72272937 -0.28433628 3.54523670  
Fe 2.22758193 7.40079171 3.31241700  
Fe 4.68678680 7.40122932 3.31463910  
Fe 2.22354652 1.75345850 0.16254611  
Fe 4.69257090 1.75283287 0.16277285

### **Fe<sub>55</sub> with nanocap(10,0)**

Fe 9.78536003 10.20204340 7.77851012  
Fe 11.87623676 10.17444319 8.79676268  
Fe 9.77226284 10.25274716 10.10552450  
Fe 9.77640719 10.17103825 5.47264411  
Fe 7.74298864 10.22397581 6.75260158  
Fe 9.20536112 12.16574926 6.74357142  
Fe 10.47490376 12.20166934 8.80867651  
Fe 9.12101483 8.24267334 6.80867658  
Fe 10.40118356 8.22303966 8.85586571  
Fe 8.09024201 9.01825336 8.84019462  
Fe 8.12603729 11.49066189 8.77987857  
Fe 11.41260082 8.93923727 6.76734868  
Fe 11.47113451 11.37486022 6.73829752  
Fe 14.08774436 10.11272318 9.52769407  
Fe 12.08376409 10.33431886 11.18495353  
Fe 9.87562165 10.27524670 12.42191520  
Fe 9.77743364 10.12998584 3.12605277  
Fe 7.65380195 10.19354707 4.36608828  
Fe 5.59776384 10.25141859 5.53151280  
Fe 8.62598481 14.28421821 5.61425888  
Fe 9.87648084 14.24007838 7.71580701  
Fe 11.21862689 14.18604252 9.81063310

Fe 8.41655634 6.11273838 5.73763276  
Fe 9.68750523 6.15478767 7.83646690  
Fe 10.91939025 6.22581836 9.99286968  
Fe 6.30264805 7.81173867 9.81331870  
Fe 6.30244920 10.32201519 9.56956998  
Fe 6.40896112 12.83751206 9.69202878  
Fe 13.04552549 7.51571270 5.58915435  
Fe 13.18208086 10.09593849 5.57496022  
Fe 13.16289854 12.67068240 5.51675580  
Fe 8.09675110 8.89052402 11.26099513  
Fe 7.90804456 11.44353177 11.16539111  
Fe 13.59005079 8.83927787 7.59578652  
Fe 13.64638350 11.39732801 7.56548614  
Fe 5.94133899 8.99020426 7.66313465  
Fe 5.99472696 11.54680058 7.59551429  
Fe 11.45031580 8.84654304 4.39716144  
Fe 11.50812183 11.37559304 4.35208288  
Fe 12.65053380 12.19264705 9.70421382  
Fe 10.38335954 12.31000408 11.20990616  
Fe 9.17283125 12.20218499 4.36245652  
Fe 7.09783357 12.26851354 5.59127598  
Fe 12.56878933 8.13203589 9.76322029  
Fe 10.66621081 8.32622108 11.20240832  
Fe 9.08094634 8.13094744 4.42279638  
Fe 7.01472365 8.18341035 5.66310659  
Fe 7.51268633 13.53546730 7.66868660  
Fe 8.80052178 13.51785974 9.79372272  
Fe 7.38571055 6.95879417 7.77593485  
Fe 8.62940718 6.95458479 9.98056050  
Fe 10.88887689 13.46891708 5.57951996  
Fe 12.19191949 13.45272975 7.66074593  
Fe 10.72421949 6.83810497 5.68735222  
Fe 12.04290897 6.87326079 7.75499866  
C 8.79619664 13.86873940 11.71953133  
C 11.26732747 14.00274706 11.78225545  
C 9.99493315 14.17648083 12.48368161  
C 6.54817156 12.85310985 11.63726319  
C 7.62283088 13.38486430 12.45212656  
C 5.75397891 10.51387732 11.36861195  
C 5.95301360 11.67731683 12.21198182  
C 6.27809902 8.09896555 11.75967205  
C 5.84365714 9.36114967 12.26422141  
C 8.30316813 6.76723934 11.92296158  
C 7.20765451 7.40448346 12.63489004  
C 10.77178952 6.49144035 11.95676522  
C 9.50782543 6.44469825 12.68067428  
C 12.76809750 7.87974605 11.70354360  
C 11.88329615 7.17313131 12.61460109  
C 14.06409796 10.04761188 11.44901477  
C 13.54002582 8.95908068 12.27154155  
C 13.05235649 12.33027706 11.61199883  
C 13.73969755 11.24165177 12.24190360  
C 12.24350381 13.17838624 12.48496272  
C 6.82626786 9.04397951 14.53905629  
C 7.48128475 9.76652661 15.62211777

C 6.08831530 9.81873490 13.60747144  
C 6.17377276 11.24064526 13.57722273  
C 7.57018007 11.23200912 15.58255832  
C 7.00290338 11.96572452 14.45933405  
C 8.86001949 7.75065924 15.95851692  
C 8.38147353 7.15044363 14.76982999  
C 7.33228981 7.76822487 14.05382677  
C 8.47763059 9.05290270 16.36316439  
C 10.83755249 8.92025461 16.36454791  
C 11.89473647 9.52671479 15.61896696  
C 9.69970539 9.72067812 16.78786362  
C 11.98150524 10.98960198 15.58607355  
C 9.78013867 11.09030899 16.75421198  
C 11.00020481 11.74011240 16.30113790  
C 13.27672316 9.42500781 13.61366764  
C 13.38338082 10.85167128 13.59797887  
C 10.71657850 7.00528933 14.77002715  
C 9.51054140 6.55890014 14.07362948  
C 10.31358812 7.66564152 15.95552927  
C 11.80809723 7.52882251 14.03672486  
C 12.44473969 8.74156263 14.52303296  
C 12.63506436 11.66273107 14.46827492  
C 12.14856795 12.92519686 13.92010908  
C 8.64179239 11.86743958 16.28770584  
C 11.10388814 13.58320797 14.62263253  
C 9.96301184 14.10180498 13.89016842  
C 10.62060335 13.02689541 15.83378430  
C 9.16951727 13.09810915 15.82460651  
C 8.77219435 13.67408350 14.59085570  
C 7.67067987 13.13704555 13.89469175

**Fe<sub>55</sub> with nanocap(6,6)**

Fe 9.86469974 10.06873770 13.07014607  
Fe 11.95732198 10.10286104 14.07708863  
Fe 9.85611965 10.10710996 15.38490949  
Fe 9.90789078 9.99903454 10.77736193  
Fe 7.85327486 10.00113966 12.01131118  
Fe 9.23983924 11.96292855 11.97958137  
Fe 10.46224807 12.06175070 14.09096193  
Fe 9.26634392 8.07849589 12.10917692  
Fe 10.54096711 8.11253853 14.12657526  
Fe 8.20167713 8.85847577 14.12550332  
Fe 8.15440411 11.29285870 14.06225276  
Fe 11.54489802 8.85723282 12.06058192  
Fe 11.51898349 11.27803684 12.05362192  
Fe 14.18191148 10.03499338 15.05992557  
Fe 12.08526231 10.15055514 16.47011117  
Fe 9.92749751 10.05093903 17.84872792  
Fe 9.95616071 9.93391903 8.32573635  
Fe 7.81237819 9.93238430 9.57188003  
Fe 5.72344291 9.86814394 10.74219662  
Fe 8.64083581 13.99709422 10.68644132  
Fe 9.80229268 14.07935208 12.92404910  
Fe 11.15428133 14.14193211 15.02682540



Fe 8.62581812 5.95639487 11.09680537  
Fe 9.95440111 5.99667112 13.14049856  
Fe 11.35535148 6.09274790 15.20516251  
Fe 6.48473781 7.52203681 15.11400758  
Fe 6.30729534 10.09957982 15.01920871  
Fe 6.11369834 12.76325687 14.47182466  
Fe 13.29093729 7.56933718 10.88601321  
Fe 13.25604990 10.10796195 10.86375630  
Fe 13.28154777 12.57546717 10.97322127  
Fe 8.15098972 8.80740680 16.54786277  
Fe 8.11939135 11.28499153 16.59016871  
Fe 13.78210298 8.87801754 12.85267030  
Fe 13.72933620 11.33202699 13.00654692  
Fe 6.06313536 8.76920363 12.99298164  
Fe 6.03151522 11.20268294 12.78269956  
Fe 11.61471806 8.76741275 9.61692199  
Fe 11.56874828 11.29079300 9.62360948  
Fe 12.63997945 12.21438551 14.99604044  
Fe 10.45826296 12.15697061 16.53500331  
Fe 9.25128933 11.97164999 9.54065636  
Fe 7.13911754 11.95915999 10.76751212  
Fe 12.78157080 8.03540379 14.80831198  
Fe 10.68863564 8.12628680 16.55111760  
Fe 9.23459538 7.97738844 9.68132335  
Fe 7.13773363 7.92387026 10.95549812  
Fe 7.52273996 13.29931937 12.75060504  
Fe 8.66747479 13.44937336 15.01027420  
Fe 7.54252941 6.75194862 13.10144108  
Fe 8.81812616 6.78892715 15.16699381  
Fe 10.93688234 13.31622333 10.86785740  
Fe 12.20053682 13.37229177 12.99082443  
Fe 10.91950966 6.78214857 10.93139015  
Fe 12.26180192 6.76325130 12.92894471  
C 10.23112954 6.07347732 16.85142909  
C 8.83631314 6.24756231 16.98059559  
C 12.75089903 7.36639042 16.62743794  
C 12.39581593 6.80077653 17.90166338  
C 11.07278866 6.18350150 18.04012110  
C 13.59659248 8.54376507 16.55281895  
C 13.93388741 11.33230529 16.56596117  
C 14.12349029 9.14327543 17.75725778  
C 14.31141849 10.59824735 17.77467770  
C 13.31683895 12.59234814 16.69708627  
C 11.00714911 14.18818148 16.91647253  
C 13.00645914 13.16174901 17.96754209  
C 11.67107540 13.73976118 18.09622005  
C 9.60228185 14.10027694 16.77404268  
C 7.10410564 13.00752705 16.20075059  
C 8.85093964 13.61455731 17.91517776  
C 7.55961220 13.11101920 17.57692088  
C 6.17740072 11.77947402 16.18272909  
C 5.93135178 9.00049069 16.75750168  
C 5.90555691 9.92282808 17.88071047  
C 6.13249519 11.29697827 17.54594039  
C 6.40226100 7.68828529 17.00036441

C 6.99758497 7.30661798 18.25548370  
C 8.18831505 6.45966456 18.24429959  
C 7.98016552 9.56425207 20.83126133  
C 7.74048172 8.19558552 20.45269575  
C 6.32266641 9.51110967 19.16649531  
C 6.79160218 8.16568925 19.37264841  
C 7.10739624 10.37637312 20.04016010  
C 10.03902029 7.68344254 21.08549128  
C 8.78255491 7.28542111 20.51536349  
C 10.31120500 9.03420606 21.47687614  
C 9.25719307 10.02312043 21.24903171  
C 13.81278300 9.19151262 20.21781952  
C 14.04753139 10.57139713 20.23812825  
C 12.72074412 8.61810464 20.97637203  
C 11.70058907 9.46462393 21.53777667  
C 11.97220986 10.86647898 21.55451444  
C 13.21230359 11.38494546 21.05977067  
C 13.92686924 8.45337937 18.98297309  
C 14.31119353 11.29361350 19.00402123  
C 11.04898452 6.91460901 20.40773727  
C 10.43403069 6.21104825 19.30522661  
C 9.00837106 6.38942688 19.39726065  
C 13.04903458 7.31687175 19.05145262  
C 12.34551503 7.40429903 20.30703752  
C 9.61843318 11.40776739 20.93947359  
C 10.94399588 11.81116455 21.18602014  
C 7.55538745 11.64277606 19.60056261  
C 6.96970772 12.10252040 18.38617987  
C 13.62498487 12.57705033 19.09495278  
C 8.82406044 12.19166353 20.00733556  
C 10.88742307 13.42234563 19.28920063  
C 12.95976593 12.61218475 20.35880579  
C 11.55839862 12.86143326 20.39989443  
C 9.46620778 13.19576839 19.15810801

#### **Fe<sub>54</sub>S with nanocap(10,0)**

Fe 9.78680412 10.20189079 7.78038966  
Fe 11.89380677 10.14674373 8.79486804  
Fe 9.77530860 10.24902935 10.07324320  
Fe 9.77329878 10.15561499 5.47395279  
Fe 7.73859605 10.24818729 6.76390601  
Fe 9.22350563 12.16213791 6.75330416  
Fe 10.50622736 12.16550941 8.83204001  
Fe 9.09307565 8.24188223 6.83504125  
Fe 10.36839875 8.23600909 8.91205825  
Fe 8.06034266 9.04752842 8.85251616  
Fe 8.14513736 11.51709124 8.79975876  
Fe 11.38005464 8.90828075 6.78630082  
Fe 11.46349508 11.34550472 6.73890291  
Fe 14.12896053 10.07855001 9.55169107  
Fe 12.09450502 10.19245138 11.19215089  
S 9.71829800 10.28493683 12.30789730  
Fe 9.76796392 10.10890636 3.13159155  
Fe 7.64373441 10.20005972 4.36962163

Fe 5.59054536 10.28635712 5.55305452  
Fe 8.66938579 14.27521057 5.61037455  
Fe 9.93546688 14.21041147 7.73375837  
Fe 11.26405719 14.18647880 9.82215924  
Fe 8.39526343 6.12299415 5.79087859  
Fe 9.66665948 6.19005213 7.90401497  
Fe 10.96477496 6.20653203 9.99197908  
Fe 6.24078001 7.86237325 9.80025617  
Fe 6.30898685 10.36492045 9.56759828  
Fe 6.42410742 12.87681520 9.69295503  
Fe 13.02051630 7.49538146 5.60305431  
Fe 13.14495251 10.04928514 5.61244962  
Fe 13.19134370 12.60484639 5.50637232  
Fe 7.90230349 9.06519376 11.26436801  
Fe 7.99037534 11.60038552 11.20950913  
Fe 13.54541136 8.79171415 7.63959583  
Fe 13.63153550 11.34876517 7.59059890  
Fe 5.92550816 9.03944213 7.65785026  
Fe 6.01409132 11.61100795 7.59883645  
Fe 11.44566450 8.81683296 4.38505757  
Fe 11.52682358 11.34248041 4.33490441  
Fe 12.67722445 12.15982003 9.69383186  
Fe 10.56252353 12.23791439 11.25644193  
Fe 9.20227184 12.19382458 4.35604568  
Fe 7.13499924 12.28193028 5.59376237  
Fe 12.52967933 8.11311231 9.77407975  
Fe 10.44582979 8.26037486 11.32853527  
Fe 9.07228632 8.11342945 4.44213013  
Fe 7.00284751 8.20895698 5.68156119  
Fe 7.56280560 13.56301595 7.67563908  
Fe 8.83558862 13.52150982 9.79210555  
Fe 7.34343384 6.99699916 7.81890737  
Fe 8.59771628 7.04393433 9.93436322  
Fe 10.92525810 13.42375284 5.59504688  
Fe 12.22648036 13.39195285 7.67256459  
Fe 10.70564556 6.82352417 5.72562791  
Fe 12.00129704 6.85487005 7.79788221  
C 8.72085205 13.84715417 11.71830445  
C 11.22211331 14.03554839 11.77602936  
C 9.93712515 14.14395310 12.47106692  
C 6.47462586 12.83863298 11.64068841  
C 7.54723097 13.38729187 12.46025591  
C 5.74510527 10.45240978 11.35993704  
C 5.94675728 11.62417205 12.20386718  
C 6.25681329 8.02351312 11.74446066  
C 5.84462255 9.30353887 12.25395449  
C 8.40006957 6.82360539 11.87153346  
C 7.27279476 7.41241902 12.59123069  
C 10.87309703 6.42177876 11.94059443  
C 9.58695447 6.45421073 12.63912737  
C 12.81191022 7.91443571 11.69975344  
C 11.93548324 7.18663386 12.60726088  
C 14.08450579 10.08227623 11.45476063  
C 13.58300007 8.97809452 12.27908959  
C 13.01952984 12.36402594 11.60625289

C 13.69708279 11.26416604 12.23268794  
C 12.20684027 13.20248428 12.47851815  
C 6.84143591 9.00772040 14.52653931  
C 7.48156158 9.73199877 15.61396540  
C 6.09776586 9.77366354 13.59768199  
C 6.16167690 11.19116229 13.56725412  
C 7.54881990 11.19928728 15.58037408  
C 6.97363090 11.92828646 14.46169896  
C 8.88940755 7.73283063 15.93565327  
C 8.42993834 7.14671667 14.73001002  
C 7.37489653 7.75028618 14.01868938  
C 8.48941983 9.02624995 16.34651110  
C 10.85126905 8.91940459 16.35729663  
C 11.90449024 9.53693703 15.61770352  
C 9.70354265 9.70647336 16.77608814  
C 11.97149803 11.00003141 15.58654989  
C 9.76610250 11.07707375 16.74533503  
C 10.97965431 11.74044707 16.29724669  
C 13.29624066 9.45018560 13.62133023  
C 13.36532497 10.87586910 13.59314939  
C 10.76195639 7.00523758 14.75850980  
C 9.56866213 6.58001410 14.03905896  
C 10.34234830 7.66059011 15.94080327  
C 11.85767472 7.53272261 14.02979084  
C 12.47107063 8.75653007 14.52422746  
C 12.60684287 11.67851184 14.46279667  
C 12.10431750 12.92979829 13.91503119  
C 8.61740651 11.84385651 16.28363338  
C 11.05971579 13.58087861 14.61767200  
C 9.90925515 14.07374807 13.87592246  
C 10.58487162 13.02169583 15.82838996  
C 9.13139227 13.07820494 15.82104439  
C 8.72575953 13.64616781 14.58759919  
C 7.61938890 13.10848272 13.90070891

#### **Fe<sub>54</sub>S with nanocap(6,6)**

Fe 9.86404887 10.05767947 13.01554352  
Fe 11.94729179 10.08362663 14.05541585  
Fe 9.86290350 10.09119181 15.32123871  
Fe 9.89923046 10.00830679 10.73981071  
Fe 7.84738192 10.00738164 11.98329162  
Fe 9.23610220 11.96038061 11.95839160  
Fe 10.47016178 12.04722723 14.06345537  
Fe 9.26147382 8.07894151 12.06056122  
Fe 10.52853227 8.10805444 14.09288452  
Fe 8.20031985 8.85286724 14.08913125  
Fe 8.15845478 11.28623305 14.06786629  
Fe 11.53534477 8.85422179 12.01975239  
Fe 11.51990834 11.26836664 12.02175931  
Fe 14.17566848 10.01320680 15.06366134  
Fe 12.12740626 10.12039216 16.42448524  
S 9.94963618 10.02832033 17.55523050  
Fe 9.94961609 9.94601826 8.29984225  
Fe 7.80042699 9.95034131 9.54336604

Fe 5.71738138 9.87529183 10.73044935  
Fe 8.63581385 14.00017107 10.68130962  
Fe 9.81332043 14.06351136 12.93243477  
Fe 11.18066715 14.12579600 15.03417800  
Fe 8.62060330 5.96061409 11.02983091  
Fe 9.92771283 5.99686481 13.09576285  
Fe 11.28759109 6.06054683 15.17666269  
Fe 6.48126562 7.50599856 15.11428987  
Fe 6.31726693 10.10021896 15.04240104  
Fe 6.12793295 12.74710576 14.48850620  
Fe 13.29139044 7.56391955 10.87855659  
Fe 13.26586696 10.09480451 10.84936633  
Fe 13.29078934 12.56082068 10.95255908  
Fe 8.11157838 8.79689081 16.49771122  
Fe 8.12466827 11.28050340 16.61823439  
Fe 13.75460034 8.85914050 12.86321762  
Fe 13.72662118 11.31556192 12.99491387  
Fe 6.06606336 8.76789112 12.98242062  
Fe 6.02428136 11.20508013 12.77794912  
Fe 11.61309665 8.77156714 9.59750185  
Fe 11.57286428 11.29480192 9.59927993  
Fe 12.64040294 12.19499496 14.98681819  
Fe 10.45826113 12.18114076 16.49050224  
Fe 9.24547989 11.98582293 9.51731241  
Fe 7.13288756 11.97055820 10.75748578  
Fe 12.75496031 7.99528899 14.85231093  
Fe 10.69143301 8.05007885 16.49440149  
Fe 9.22817294 7.98450816 9.64287043  
Fe 7.13212356 7.93638932 10.91959522  
Fe 7.52477149 13.30301547 12.75415489  
Fe 8.67195061 13.42283412 15.04776387  
Fe 7.53284542 6.75409382 13.04691368  
Fe 8.79357335 6.78809426 15.14279237  
Fe 10.93113338 13.30922869 10.85772870  
Fe 12.21167206 13.36740390 12.96122317  
Fe 10.91945437 6.77654336 10.89924759  
Fe 12.24210660 6.76624423 12.92316664  
C 10.28119287 6.04330890 16.88297971  
C 8.88871892 6.27201036 16.97838498  
C 12.77848772 7.37129612 16.67396443  
C 12.42893401 6.78673353 17.94029045  
C 11.11038872 6.15883792 18.07715980  
C 13.62268286 8.53728131 16.58894848  
C 13.93340782 11.30345404 16.58976556  
C 14.15301093 9.13782066 17.79484091  
C 14.33076929 10.59413905 17.80640324  
C 13.27552987 12.54567271 16.71310595  
C 10.97228609 14.17312850 16.93097461  
C 12.96841538 13.13152601 17.97754046  
C 11.63528734 13.71635970 18.11058005  
C 9.56587120 14.08423160 16.80959724  
C 7.09882990 12.99400636 16.23947478  
C 8.81762279 13.62217486 17.96538975  
C 7.53292658 13.11577714 17.62574163  
C 6.18289806 11.77063885 16.21923419

C 5.93383201 9.01511438 16.77934319  
 C 5.89510720 9.92643654 17.91411512  
 C 6.11368178 11.30057361 17.59063221  
 C 6.41013224 7.70049173 17.00790249  
 C 7.02645498 7.32363656 18.25655885  
 C 8.22556402 6.48553501 18.23923225  
 C 7.97881095 9.56163916 20.86196777  
 C 7.74777832 8.19588291 20.46900788  
 C 6.32290564 9.50700070 19.19377229  
 C 6.80417142 8.16445504 19.38624760  
 C 7.10284673 10.37251907 20.07214075  
 C 10.04314956 7.69180326 21.10316924  
 C 8.79447017 7.29223605 20.52416491  
 C 10.30637110 9.04070274 21.50660539  
 C 9.24796653 10.02721871 21.29120638  
 C 13.81528779 9.20109670 20.25492513  
 C 14.04346100 10.58102998 20.26830601  
 C 12.71975576 8.62856259 21.00886778  
 C 11.69472213 9.47281557 21.56714584  
 C 11.96169196 10.87533815 21.58240704  
 C 13.19822868 11.39360157 21.08107732  
 C 13.94124583 8.45813883 19.02253723  
 C 14.30786372 11.29579142 19.02985977  
 C 11.05863631 6.92066658 20.43530489  
 C 10.45674510 6.20859159 19.33158270  
 C 9.03120528 6.40413160 19.40099442  
 C 13.06604820 7.31834778 19.09068823  
 C 12.35373513 7.41059625 20.34222028  
 C 9.60042691 11.41353487 20.98116537  
 C 10.92757119 11.81807155 21.21717601  
 C 7.52990670 11.65203997 19.65055620  
 C 6.93730293 12.11306637 18.43819357  
 C 13.59925182 12.56957252 19.10914103  
 C 8.79959404 12.19948174 20.05478930  
 C 10.85995152 13.42052448 19.31548719  
 C 12.93984619 12.61571677 20.37398359  
 C 11.53766541 12.86452724 20.42323296  
 C 9.43631624 13.20419633 19.20433454

**Fe<sub>52</sub>S<sub>3</sub> with nanocap(10,0)**

Fe 9.75518349 10.23213980 7.82996535  
 Fe 11.94934242 10.14692948 8.82320712  
 Fe 9.43540053 10.43282002 10.23163102  
 Fe 9.76945769 10.19961447 5.57441302  
 Fe 7.71411179 10.27644788 6.81425270  
 Fe 9.22040052 12.18972353 6.80462620  
 Fe 10.45985364 12.20523954 8.91011362  
 Fe 9.07802343 8.28650526 6.83828333  
 Fe 10.37447044 8.23430508 8.85255292  
 Fe 8.01889791 9.00844473 8.84513732  
 Fe 8.06844309 11.61872200 8.77883636  
 Fe 11.37292608 8.95663326 6.80902242  
 Fe 11.45451927 11.38540494 6.81143728  
 Fe 14.15376884 10.08119845 9.61488976

S 11.50535116 10.80031212 10.84489422  
Fe 11.43202838 9.16667897 12.39913734  
Fe 9.79187265 10.16755692 3.11168897  
Fe 7.69502783 10.22712962 4.35552005  
Fe 5.60129033 10.27147338 5.56604443  
Fe 8.69286409 14.28795537 5.61123718  
Fe 9.92361744 14.24189088 7.74418974  
Fe 11.27052303 14.16948285 9.85772526  
Fe 8.40871612 6.15692362 5.81500034  
Fe 9.63771833 6.19023375 7.94422264  
Fe 10.92062902 6.22952483 10.09581135  
Fe 6.20559251 7.79743647 9.80602611  
Fe 6.23458021 10.37731204 9.44729592  
Fe 6.42609060 12.85336468 9.64553152  
Fe 13.00081431 7.52967672 5.67245031  
Fe 13.15848817 10.08796070 5.67746301  
Fe 13.21402695 12.64296778 5.63708276  
Fe 7.71376391 9.21082630 11.26568076  
S 9.29029521 10.59879257 12.56321551  
Fe 13.57984578 8.78893512 7.66466615  
Fe 13.67055375 11.36496717 7.64707722  
Fe 5.86028188 8.98692815 7.61656314  
Fe 5.84572643 11.67474048 7.51222691  
Fe 11.43016604 8.87182816 4.37549901  
Fe 11.52407080 11.37813931 4.37592849  
Fe 12.81535804 12.22430173 9.79588067  
Fe 10.02009795 12.43263026 11.32421621  
Fe 9.22425176 12.21301444 4.37558952  
Fe 7.13920493 12.29352689 5.61255165  
Fe 12.54808037 8.10509572 9.79868788  
S 9.93238496 8.42324084 10.92223781  
Fe 9.08475052 8.16949938 4.42889380  
Fe 6.99486750 8.20863611 5.67064256  
Fe 7.48013956 13.68887613 7.60821000  
Fe 8.76103454 13.65236207 9.75146304  
Fe 7.31360108 6.95651997 7.82326411  
Fe 8.52289911 6.97943002 10.05082631  
Fe 10.95638235 13.47114020 5.65785946  
Fe 12.23148624 13.42387927 7.75778295  
Fe 10.70440787 6.85430073 5.77077328  
Fe 11.98574869 6.83821364 7.84073661  
C 8.75827241 14.00891553 11.69304491  
C 11.28455819 13.96022294 11.79093895  
C 9.99666112 14.23444962 12.45777733  
C 6.66055572 12.73820802 11.55357748  
C 7.60087245 13.42834543 12.39315029  
C 5.78517838 10.38011200 11.28033937  
C 6.05152853 11.58070072 12.08707247  
C 6.24231732 7.94165294 11.75724727  
C 5.81528139 9.25009078 12.21597043  
C 8.29916949 6.54710033 11.96964236  
C 7.22777503 7.29279831 12.63331456  
C 10.83914304 6.30675146 12.01320162  
C 9.54144682 6.30212132 12.70644252  
C 12.86581998 7.83358617 11.72103591

C 11.92547657 7.12912515 12.61655536  
C 14.13712048 10.12872916 11.48267555  
C 13.55894498 9.00347157 12.24919011  
C 13.29862503 12.51587487 11.71505323  
C 13.85761488 11.33539041 12.29046469  
C 12.36089603 13.26941323 12.52472499  
C 6.82855122 9.01108437 14.49168647  
C 7.47024685 9.76872978 15.56101153  
C 6.11384470 9.76718154 13.54078529  
C 6.22330463 11.19160298 13.45921834  
C 7.54670243 11.23501837 15.50529166  
C 7.00491260 11.95190158 14.35847551  
C 8.85275881 7.76928817 15.94828740  
C 8.38224433 7.12424439 14.77535452  
C 7.33323919 7.70745353 14.03860792  
C 8.45658284 9.07396882 16.32796172  
C 10.81127289 8.97499390 16.34439857  
C 11.85341298 9.59484254 15.59894472  
C 9.66597677 9.76106626 16.76306853  
C 11.96200749 11.05194217 15.57851873  
C 9.73536901 11.12845137 16.71821985  
C 10.95853725 11.78709548 16.27836385  
C 13.22599508 9.50720143 13.57390183  
C 13.40380124 10.93325516 13.59654978  
C 10.70684406 7.02970438 14.77766087  
C 9.52539295 6.54473538 14.09268995  
C 10.30188056 7.70917575 15.94667794  
C 11.78140919 7.56352844 14.01367153  
C 12.37264972 8.82569035 14.47585913  
C 12.64865990 11.73305796 14.48451141  
C 12.17815993 13.00025055 13.94455202  
C 8.59699069 11.88787299 16.22797332  
C 11.08329007 13.62498452 14.61014208  
C 9.94693355 14.12280305 13.86433783  
C 10.57592203 13.06623086 15.80724052  
C 9.12012903 13.12192632 15.77093649  
C 8.73693791 13.70131295 14.54130598  
C 7.64352473 13.15446570 13.81848391

### **Fe<sub>52</sub>S<sub>3</sub> with nanocap(6,6)**

Fe 9.90763813 10.04024731 13.06229474  
Fe 12.03021620 10.02242909 14.14448233  
Fe 9.77494891 10.18769703 15.41422370  
Fe 9.95673773 9.98760505 10.79418489  
Fe 7.90253240 9.99340899 12.00114398  
Fe 9.28901776 11.93863745 11.98938054  
Fe 10.52004928 12.06746881 14.07053055  
Fe 9.32466282 8.06423568 12.08014648  
Fe 10.60178063 8.03567304 14.14321860  
Fe 8.21344386 8.80047351 14.09297157  
Fe 8.14682284 11.28544998 14.03774950  
Fe 11.61254697 8.81023219 12.08504962  
Fe 11.57708090 11.22316510 12.06571208  
Fe 14.24193305 10.07952818 15.03180093



S 11.76422606 10.55298869 16.28853559  
Fe 10.65568248 9.51740493 17.94698834  
Fe 10.02019483 9.93429441 8.33661592  
Fe 7.85995833 9.94751812 9.56334024  
Fe 5.76650143 9.86349117 10.75114355  
Fe 8.71269328 14.00322372 10.72885676  
Fe 9.83751632 14.05983627 13.01253348  
Fe 11.25775991 14.14266089 15.03163464  
Fe 8.65337913 5.94873229 11.02161588  
Fe 9.96555685 5.95899150 13.10060335  
Fe 11.30734176 6.02392095 15.18895455  
Fe 6.52320111 7.42029299 15.10685649  
Fe 6.29367132 10.17968109 15.11025896  
Fe 6.27691192 12.65970303 14.55789806  
Fe 13.32439932 7.50991756 10.88816537  
Fe 13.31562390 10.06081739 10.83501183  
Fe 13.34144092 12.52180054 10.94069330  
Fe 7.93559192 8.93654323 16.38795205  
S 8.89142467 10.74937346 17.40634032  
Fe 13.89882131 8.82389886 12.81947031  
Fe 13.78216721 11.28754247 12.98002927  
Fe 6.09732031 8.78226376 13.03621109  
Fe 6.00264066 11.22597699 12.72969891  
Fe 11.65266072 8.73811849 9.62635187  
Fe 11.61423916 11.27767026 9.64156036  
Fe 12.74435379 12.19982823 15.07604863  
Fe 10.37314848 12.30145502 16.41086035  
Fe 9.30083910 11.97634280 9.55327924  
Fe 7.20196754 11.95736319 10.77425682  
Fe 12.90898134 7.93563359 14.75633657  
S 10.04683199 8.20168491 16.25044768  
Fe 9.26181110 7.98016629 9.67009738  
Fe 7.16838723 7.93537922 10.96347410  
Fe 7.52547480 13.34804940 12.72000060  
Fe 8.60968173 13.40739718 15.13993795  
Fe 7.58960792 6.68750387 13.04664694  
Fe 8.80364658 6.62002143 15.28290618  
Fe 10.98058293 13.28893315 10.93019816  
Fe 12.32656955 13.36327507 12.96037635  
Fe 10.95239251 6.73195189 10.90006856  
Fe 12.32771472 6.64372220 12.89631754  
C 10.14801645 5.70460995 16.87113694  
C 8.76076627 5.86255553 17.03643776  
C 12.93420240 7.24625000 16.55037394  
C 12.38532475 6.74560520 17.79012329  
C 11.06223705 6.06758741 17.96316870  
C 13.76220172 8.39363879 16.46840413  
C 14.19098842 11.55008325 16.51774096  
C 14.16498891 9.16970780 17.62810475  
C 14.36795729 10.65393077 17.66844964  
C 13.51352366 12.76764664 16.69566602  
C 10.85165365 14.20517727 16.91461782  
C 12.96823215 13.21897465 17.92761832  
C 11.57730074 13.71671692 18.05519083  
C 9.43359061 14.07471465 16.86922338

C 6.99352590 13.04617453 16.35947166  
 C 8.65802803 13.70174101 18.05222358  
 C 7.35398453 13.25503634 17.75615264  
 C 6.11839064 11.86715016 16.33498464  
 C 5.91219378 9.11913238 16.81772638  
 C 5.82160230 10.02860305 17.96142792  
 C 5.94407943 11.41967550 17.70107056  
 C 6.37290025 7.77387526 16.98147361  
 C 7.00258015 7.32722084 18.21050473  
 C 8.13651614 6.37041111 18.22525111  
 C 7.96783551 9.56908984 20.82936854  
 C 7.74776542 8.20821798 20.41213867  
 C 6.30032011 9.54397594 19.19943364  
 C 6.81019479 8.19444536 19.32984845  
 C 7.06364232 10.39879200 20.08923578  
 C 10.04096168 7.69082912 21.01987040  
 C 8.78717348 7.29642406 20.45536815  
 C 10.30146450 9.03406376 21.42743074  
 C 9.23562388 10.02570278 21.24954972  
 C 13.77083047 9.21770180 20.11052506  
 C 14.00780258 10.58865959 20.15326641  
 C 12.70005814 8.63249889 20.88496750  
 C 11.68876989 9.46562808 21.47745380  
 C 11.94787112 10.86722953 21.50670421  
 C 13.17380868 11.38782568 20.99747725  
 C 13.86511676 8.51145953 18.85264152  
 C 14.26569779 11.31385187 18.92408982  
 C 11.04261012 6.92166990 20.32349503  
 C 10.42850287 6.20100586 19.23025561  
 C 8.99690625 6.38569704 19.35211124  
 C 12.98619779 7.36078900 18.92309041  
 C 12.32333021 7.42676129 20.20494003  
 C 9.56566549 11.41764881 20.95485700  
 C 10.90205446 11.80955211 21.15746794  
 C 7.40997793 11.73070807 19.72078237  
 C 6.73613268 12.25392807 18.56983399  
 C 13.56591109 12.59606418 19.05047453  
 C 8.72343953 12.23901950 20.08882402  
 C 10.80224217 13.41132221 19.27080653  
 C 12.90585832 12.61446374 20.30641759  
 C 11.50214323 12.85908728 20.36452956  
 C 9.35378714 13.24443801 19.23625954

**Fe<sub>49</sub>S<sub>6</sub> with nanocap(10,0)**

Fe 9.78045069 10.19539069 7.62426578  
 Fe 11.90309530 10.12290150 8.55141915  
 Fe 9.73852791 10.26427082 9.97698346  
 Fe 9.72647054 10.13320037 5.31045024  
 Fe 7.71332376 10.27377760 6.59659083  
 Fe 9.21735485 12.16839205 6.53218249  
 Fe 10.52585809 12.18762092 8.58401937  
 Fe 9.06246783 8.25248725 6.63289360  
 Fe 10.35139182 8.19599421 8.67998350  
 Fe 8.04030117 9.03265366 8.61324359

Fe 8.15444005 11.54598875 8.57753886  
Fe 11.37172148 8.87264170 6.56055725  
Fe 11.46521199 11.32883223 6.51370440  
Fe 14.26331096 10.05328461 9.59422965  
S 12.30989814 10.09075422 10.64104417  
S 10.18142597 9.75145441 12.26200168  
Fe 9.74856227 10.12500759 2.96930002  
Fe 7.56471689 10.22219944 4.26002484  
Fe 5.54264671 10.40022955 5.52065007  
Fe 8.70362669 14.19019496 5.50985517  
Fe 9.93955599 14.23761774 7.67195809  
Fe 11.23670435 14.18838383 9.90615188  
Fe 8.29782858 6.17211492 5.65143797  
Fe 9.59641692 6.18527055 7.83142135  
Fe 11.07912963 5.91002768 9.89984644  
Fe 6.22845911 7.77139344 9.92620733  
Fe 6.32233530 10.37501181 9.76191796  
Fe 6.38829157 12.91175753 9.78938537  
Fe 13.00745292 7.57095716 5.60004541  
Fe 13.21834612 10.02824273 5.56247901  
Fe 13.24970469 12.48960281 5.49524775  
S 7.90001848 9.00737373 10.74196523  
S 7.95647869 11.60831907 10.70884061  
Fe 13.57049506 8.73872767 7.69156498  
Fe 13.61982818 11.36343186 7.63446097  
Fe 5.91497470 9.09711322 7.68577295  
Fe 6.01304207 11.60963726 7.62638020  
Fe 11.36735291 8.90343981 4.19784247  
Fe 11.52644683 11.30932121 4.15767111  
Fe 12.67669800 12.22958924 9.85148310  
S 10.58387312 12.25670672 10.76379315  
Fe 9.26917672 12.11695644 4.15995019  
Fe 7.06706178 12.34002826 5.49230047  
Fe 12.51515048 8.02312791 9.93291938  
S 10.51041995 7.80227938 10.84701042  
Fe 8.95303538 8.08869495 4.29963081  
Fe 6.88966619 8.24577094 5.58275618  
Fe 7.57220425 13.57060645 7.67279696  
Fe 8.85026929 13.55069836 9.94202506  
Fe 7.30664671 6.99768684 7.76868203  
Fe 8.56556276 7.03085377 10.08986304  
Fe 11.00302514 13.43383204 5.49468093  
Fe 12.21272652 13.43695628 7.61049849  
Fe 10.65451598 6.78830690 5.57251361  
Fe 11.97245655 6.80040640 7.74876914  
C 8.61466861 14.04259568 11.85588060  
C 11.19984849 14.08380567 11.92657358  
C 9.88020332 14.23208480 12.57891201  
C 6.40099123 12.83199240 11.78941917  
C 7.45915331 13.49618460 12.57067394  
C 5.52353010 10.44505012 11.49062502  
C 5.79873687 11.63991712 12.31951993  
C 6.22037593 8.01786697 11.91078142  
C 5.71306933 9.28032622 12.37377273  
C 8.32893848 6.65499341 12.03067542

C 7.22077419 7.31913126 12.72792114  
C 10.89487377 6.52827290 12.09725847  
C 9.57455946 6.42318832 12.76964055  
C 12.99555834 7.85112478 11.89055622  
C 12.06254232 7.17730517 12.76553768  
C 14.01563754 10.14956851 11.58341433  
C 13.67457428 8.98515401 12.44318916  
C 13.14559564 12.52502289 11.77902336  
C 13.73913003 11.37785141 12.37688874  
C 12.26437346 13.33197570 12.61290404  
C 6.84853931 9.00009650 14.59195594  
C 7.49100188 9.74289871 15.66973470  
C 6.07773387 9.76098416 13.68365502  
C 6.12910080 11.19586796 13.65062639  
C 7.54353297 11.20457948 15.63636530  
C 6.95661179 11.94000186 14.51967567  
C 8.90859660 7.76624844 16.01610531  
C 8.43881775 7.13254333 14.84471740  
C 7.36400879 7.71084741 14.12210502  
C 8.49690114 9.05272398 16.41841709  
C 10.86531300 8.96852684 16.44198781  
C 11.92903480 9.58574412 15.71699783  
C 9.70409389 9.74091715 16.86031894  
C 11.97658399 11.05169928 15.68033040  
C 9.75217281 11.10543545 16.83111099  
C 10.96296101 11.77485964 16.37952724  
C 13.36979403 9.49952008 13.74873517  
C 13.40501149 10.94578174 13.70701509  
C 10.79315089 7.05498157 14.85831592  
C 9.59075745 6.58622179 14.15765598  
C 10.36706674 7.70731000 16.02931284  
C 11.92940416 7.55659603 14.15940192  
C 12.53349654 8.79863406 14.64913984  
C 12.62096174 11.74329395 14.57083647  
C 12.10841355 13.00029953 14.02421785  
C 8.59479829 11.85539960 16.35542227  
C 11.02583109 13.61530027 14.70701971  
C 9.86798496 14.12146604 13.97858881  
C 10.55262718 13.04378612 15.90712820  
C 9.09511982 13.09093194 15.89537781  
C 8.67733084 13.69256740 14.68707299  
C 7.56649053 13.16292796 13.98658452

### **Fe<sub>49</sub>S<sub>6</sub> with nanocap(6,6)**

Fe 9.90382317 10.03252945 12.97995465  
Fe 12.02054505 10.04049263 13.90977668  
Fe 10.03383747 9.99266779 15.54668378  
Fe 9.89340739 10.00851294 10.72086789  
Fe 7.86847210 10.00587066 11.95050779  
Fe 9.24498839 11.94411747 11.92507842  
Fe 10.51066551 12.03117647 14.00937631  
Fe 9.25813978 8.08257052 11.98328227  
Fe 10.61063745 8.03862897 13.93776344  
Fe 8.24811286 8.81306576 14.05796088

Fe 8.16331487 11.28577138 14.01482278  
Fe 11.54624446 8.84883787 11.89310329  
Fe 11.51735644 11.27092862 11.93674478  
Fe 14.34491515 10.13026936 14.99098157  
S 12.22215493 10.02203974 16.04156602  
S 10.18208304 9.84311241 17.95832735  
Fe 9.92845477 9.95725565 8.27224334  
Fe 7.80784867 9.92132655 9.53916212  
Fe 5.70898304 9.85781435 10.78661797  
Fe 8.65167033 14.01885071 10.74219483  
Fe 9.79065544 14.04640311 12.97532672  
Fe 10.74747564 14.14946658 15.25152220  
Fe 8.56809022 5.97911660 11.04710078  
Fe 9.94368219 5.96442701 13.05080046  
Fe 11.27130546 5.84648846 15.13738711  
Fe 6.34898879 7.91178711 15.30486737  
Fe 6.28489244 10.31678669 15.21832186  
Fe 6.15497572 12.74335213 14.58423233  
Fe 13.27413364 7.56780101 10.83523046  
Fe 13.30884793 10.08921854 10.78483506  
Fe 13.24541935 12.60097441 10.95224111  
S 8.27531443 8.55429765 16.19947159  
S 8.32283384 11.17940943 16.16022385  
Fe 13.76995779 8.83082057 12.88628203  
Fe 13.75154274 11.32497598 12.94161093  
Fe 6.09244752 8.80656968 13.02840671  
Fe 6.03186334 11.22925595 12.78278299  
Fe 11.61389206 8.76094474 9.49198464  
Fe 11.59383503 11.29093380 9.54505671  
Fe 12.77566742 12.09243442 15.15781078  
S 10.80890270 12.11632739 16.14305597  
Fe 9.27132461 11.98990890 9.51414836  
Fe 7.14830608 11.95733383 10.71609548  
Fe 12.84073816 7.98557660 15.11945431  
S 10.78013091 7.93669675 16.05943898  
Fe 9.23665046 7.95466511 9.59680205  
Fe 7.09987715 7.90400816 10.92920895  
Fe 7.50854439 13.29103073 12.75257842  
Fe 8.47528448 13.40029690 15.21798289  
Fe 7.54579865 6.78071303 13.18564315  
Fe 8.97273732 6.66598161 15.32560737  
Fe 10.95020212 13.35683160 10.85565790  
Fe 12.18256006 13.36512134 13.08196134  
Fe 10.93406918 6.72889769 10.85902301  
Fe 12.30565155 6.74913222 12.94588870  
C 10.21409034 5.66888438 16.94556840  
C 8.82730588 5.87541436 17.07060028  
C 13.22249746 7.06525014 16.76903270  
C 12.52587143 6.62032621 17.95273253  
C 11.13812878 6.03028107 18.04868539  
C 14.01909425 8.19893249 16.68351614  
C 14.22642278 11.49355886 16.62135046  
C 14.30038075 9.08068412 17.79548230  
C 14.40544910 10.58699935 17.78296289  
C 13.53505671 12.70879821 16.77182539

C 10.90619937 14.44301351 17.11607750  
C 13.00520430 13.23262570 17.99508803  
C 11.66771422 13.85766614 18.16256529  
C 9.52800477 14.38883585 16.98014513  
C 6.73387988 13.25539637 16.39236425  
C 8.70106500 13.77505660 18.00174605  
C 7.37324640 13.28429486 17.69866414  
C 5.83055350 12.07417264 16.36905940  
C 5.61323250 8.92773050 16.92801153  
C 5.76278691 9.98438840 17.91763748  
C 5.91811227 11.40911748 17.64821556  
C 6.11702033 7.64834482 17.15606786  
C 6.92482510 7.23025045 18.27376936  
C 8.13822530 6.35189140 18.24920159  
C 7.97648768 9.57217996 20.80607744  
C 7.74564522 8.20802669 20.41987471  
C 6.33551621 9.52914133 19.13836341  
C 6.81207633 8.17377416 19.33619500  
C 7.11282303 10.38372585 20.00711590  
C 10.02768372 7.69821540 21.06112814  
C 8.78373877 7.30136780 20.47656335  
C 10.28424364 9.03850635 21.46833358  
C 9.23222768 10.03184483 21.24091425  
C 13.78499801 9.19060833 20.24392629  
C 14.00723783 10.56663264 20.25703929  
C 12.68872132 8.62414738 20.99360416  
C 11.66915543 9.46608212 21.54325367  
C 11.93315699 10.86695705 21.56330494  
C 13.16376316 11.37577205 21.07396611  
C 13.95261843 8.44218056 19.02515472  
C 14.26408613 11.27365833 19.01482457  
C 11.04124183 6.92716379 20.38847357  
C 10.44863904 6.21619120 19.27787840  
C 9.00969125 6.39977924 19.36994632  
C 13.07157960 7.28039646 19.09229278  
C 12.33404268 7.40640694 20.32103686  
C 9.57946482 11.41707755 20.92493385  
C 10.89787683 11.81568714 21.18191734  
C 7.50558614 11.67865136 19.59695252  
C 6.83580473 12.19270827 18.45939344  
C 13.57502130 12.56985126 19.11433310  
C 8.78536474 12.21174920 19.99674465  
C 10.84325062 13.45373293 19.30104888  
C 12.90397114 12.59971976 20.35928934  
C 11.50553624 12.86140245 20.40224072  
C 9.40434536 13.24548951 19.16953548

**Fe<sub>55</sub> with CNT(10,0)**

Fe 9.80248480 10.11948933 7.55745597  
Fe 11.89767556 10.16295651 8.59145919  
Fe 9.82181237 10.11522116 9.91494365  
Fe 9.78832241 10.12427698 5.29647381  
Fe 7.74821169 10.07056268 6.56074461  
Fe 9.13559493 12.05721168 6.56054756

Fe 10.40951917 12.12179228 8.61605437  
Fe 9.20105589 8.14672648 6.56116487  
Fe 10.49810186 8.13579030 8.60331009  
Fe 8.14512094 8.85266886 8.61902860  
Fe 8.08824325 11.31252988 8.60564757  
Fe 11.48249028 8.93531276 6.54197264  
Fe 11.43790876 11.35512440 6.55234129  
Fe 14.04701533 10.15303677 9.45289796  
Fe 11.95403934 10.45324346 10.96095184  
Fe 9.81838721 10.14031966 12.19464545  
Fe 9.77711760 10.12374433 2.83941468  
Fe 7.66907260 10.08692125 4.11971959  
Fe 5.58075399 10.04020821 5.40678891  
Fe 8.45706934 14.12305929 5.41306625  
Fe 9.73391656 14.16041729 7.49002472  
Fe 11.08866179 14.16054913 9.56364081  
Fe 8.54338782 6.08405916 5.41478516  
Fe 9.88763216 6.05574450 7.46618774  
Fe 11.14721901 6.10039243 9.51026022  
Fe 6.42765571 7.61270605 9.54759702  
Fe 6.31799014 10.06459389 9.48481708  
Fe 6.35627194 12.58428908 9.51080761  
Fe 13.22027128 7.68314905 5.36026193  
Fe 13.22112034 10.19077397 5.38334225  
Fe 13.15358035 12.67659228 5.39538872  
Fe 8.34465187 8.55947535 10.98488660  
Fe 7.91831727 11.08826489 10.99170099  
Fe 13.69284650 8.94837362 7.41024745  
Fe 13.62931296 11.45668874 7.44029538  
Fe 5.97990635 8.77074349 7.47712952  
Fe 5.93889815 11.29622724 7.46523336  
Fe 11.50476729 8.90980736 4.10936573  
Fe 11.47015103 11.39702823 4.11689847  
Fe 12.60437044 12.20545965 9.50253536  
Fe 10.16388750 12.22801773 11.00253443  
Fe 9.10245039 12.12372783 4.11827217  
Fe 7.00039763 12.08310381 5.43143786  
Fe 12.66989090 8.10438116 9.45877965  
Fe 10.84440147 8.20140454 10.96065711  
Fe 9.15963748 8.10543915 4.13352819  
Fe 7.04275024 8.04165265 5.42321550  
Fe 7.36292602 13.34891665 7.47151937  
Fe 8.68713376 13.41183976 9.51149248  
Fe 7.48774192 6.79073552 7.48974630  
Fe 8.79190249 6.77573520 9.54187232  
Fe 10.79736858 13.41717468 5.41166474  
Fe 12.10021415 13.44958426 7.48014762  
Fe 10.90251663 6.84398816 5.38443157  
Fe 12.23720709 6.87276129 7.43348099  
C 13.00453069 12.27368316 11.42288695  
C 13.88093357 9.99455963 11.38627630  
C 13.66072144 11.21202413 12.14325409  
C 11.18648374 13.90817197 11.49681351  
C 12.22554387 13.20443435 12.21798076  
C 8.76142267 13.77212192 11.44955816

C 9.94392985 14.04396159 12.23227572  
C 6.60748957 12.58387811 11.42728768  
C 7.58470039 13.34553188 12.17628279  
C 5.97796030 10.22329249 11.41045871  
C 6.04281125 11.45835878 12.15456413  
C 6.52518999 7.83140632 11.48736437  
C 6.04121487 8.99845178 12.18568085  
C 8.54829665 6.49917299 11.48246218  
C 7.42753582 6.98899291 12.24534567  
C 10.97431952 6.24020238 11.45633395  
C 9.75090504 6.18848216 12.22776317  
C 12.89954509 7.74195116 11.36870708  
C 12.10291079 6.82339854 12.14887126  
C 13.61676596 8.76628595 12.10727712  
C 12.24582858 13.17921671 13.64777638  
C 13.68268710 11.18780366 13.58004008  
C 13.10588693 12.25735974 14.33055694  
C 9.92713360 13.98391947 13.67398179  
C 11.14190475 13.73424275 14.39344760  
C 7.54425191 13.38362282 13.60182703  
C 8.68304245 13.83055702 14.35546023  
C 5.99956967 11.47160068 13.58348264  
C 6.57918460 12.57761784 14.29201630  
C 5.98436546 9.00937292 13.60935340  
C 5.78114987 10.24883939 14.29446672  
C 7.45811580 7.04301720 13.68612510  
C 6.56931693 7.92989562 14.36786682  
C 9.76841175 6.19551217 13.65599573  
C 8.57099462 6.49473994 14.39987973  
C 12.13891062 6.83421447 13.58708874  
C 11.02521001 6.34297128 14.34121890  
C 13.71628710 8.72614735 13.51936903  
C 13.10157001 7.64513872 14.24970850  
C 13.94932231 9.95491145 14.24523829  
C 11.12120089 13.65638241 15.81906130  
C 13.11936832 12.21306134 15.75978716  
C 12.22899473 13.04661352 16.51647242  
C 8.65784329 13.80082845 15.78545603  
C 9.88308632 13.87475685 16.52783860  
C 6.52629940 12.60060762 15.70571674  
C 7.47362232 13.37157114 16.46829096  
C 5.71421149 10.26871392 15.71090820  
C 5.82706713 11.53715816 16.37454944  
C 6.58621384 7.98199716 15.79445673  
C 5.95367755 9.07471455 16.47492672  
C 8.60190827 6.55640383 15.82857720  
C 7.50141689 7.16154437 16.53680011  
C 11.06103930 6.38866462 15.76761629  
C 9.84294106 6.31879747 16.52680875  
C 13.18260327 7.61404344 15.66422097  
C 12.24752307 6.83954027 16.43385059  
C 14.02057508 9.93388226 15.65809922  
C 13.90697288 8.66477454 16.32582258  
C 13.77058576 11.12633622 16.42619784  
C 9.86329371 13.82489226 17.95759922



C 12.22572430 12.98919086 17.94308155  
C 11.11289331 13.59073079 18.64301387  
C 7.45166341 13.32690356 17.90374738  
C 8.62186721 13.65133524 18.67477220  
C 5.75328400 11.56670182 17.76084655  
C 6.44710281 12.55257242 18.53524784  
C 5.96892324 9.12901024 17.90909789  
C 5.67960073 10.36532612 18.53635882  
C 7.52211440 7.21802592 17.96757128  
C 6.67094243 8.14024448 18.68230150  
C 9.87952749 6.37192998 17.95372545  
C 8.63945169 6.61372297 18.65472088  
C 12.28768572 6.88217122 17.87018933  
C 11.13131019 6.55107522 18.65622466  
C 13.99375065 8.63758299 17.70888787  
C 13.29970579 7.65577172 18.48851325  
C 13.77673535 11.07496261 17.86225627  
C 14.07963014 9.83992024 18.48622120  
C 13.08515123 12.06299803 18.64501896  
C 6.70809947 9.68882041 20.68824600  
C 7.54646603 10.15955428 21.78363839  
C 6.14649235 10.66831284 19.85125780  
C 6.62357455 12.02395409 19.84976814  
C 8.03491805 11.54075415 21.78181754  
C 7.67732578 12.43258575 20.68580965  
C 8.32139468 7.83741770 22.00749621  
C 7.70984970 7.45512722 20.78901370  
C 6.86724336 8.35970648 20.10501150  
C 8.31345485 9.17125823 22.47541652  
C 10.55003107 8.37714571 22.46198449  
C 11.75895721 8.66273501 21.75650549  
C 9.67657616 9.45596129 22.91177550  
C 12.24837280 10.04388151 21.75308723  
C 10.13447987 10.74632577 22.90891797  
C 11.49100851 11.03100578 22.45567245  
C 13.14492421 8.18067796 19.80661899  
C 13.62711090 9.53613847 19.80464616  
C 9.91664571 6.66970063 20.77733854  
C 8.66582200 6.66264418 20.04988887  
C 9.69685317 7.34826034 21.99893700  
C 11.13375128 6.84220873 20.07912577  
C 12.10157163 7.77173247 20.65441656  
C 13.07430474 10.51518709 20.64941047  
C 12.90582921 11.84359984 20.06935639  
C 9.25424097 11.82613099 22.47159154  
C 12.07033128 12.74853221 20.76373049  
C 11.10312425 13.54181809 20.03722836  
C 11.47574837 12.36580157 21.98807258  
C 10.09964053 12.85470847 21.99902820  
C 9.86258125 13.53507036 20.78029672  
C 8.63685078 13.36316156 20.09929656

**Fe<sub>55</sub> with CNT(6,6)**

Fe 9.86823382 9.94156172 9.96177357

Fe 11.93045229 9.84479015 11.00373107  
Fe 9.78089606 9.98541991 12.25671544  
Fe 9.87095427 9.90743500 7.67625113  
Fe 7.82451327 10.02549804 8.92171397  
Fe 9.33955428 11.90595664 8.92288824  
Fe 10.61410509 11.88054021 10.99256841  
Fe 9.14250610 8.00754515 8.98618336  
Fe 10.41076460 7.97130522 11.04326348  
Fe 8.09608882 8.81066209 10.98350219  
Fe 8.23143993 11.28752927 10.93636005  
Fe 11.45544703 8.65034037 8.96384434  
Fe 11.57454925 11.03969913 8.93584625  
Fe 14.32603712 9.71342878 11.79580178  
Fe 11.75356751 9.87045309 13.44258505  
Fe 9.71672006 10.05170447 14.74110747  
Fe 9.85006665 9.87856663 5.22506932  
Fe 7.78537087 9.97812886 6.48967349  
Fe 5.66784322 10.08782488 7.75575646  
Fe 8.77001896 13.98754581 7.77008538  
Fe 10.08721506 13.98715049 9.81158681  
Fe 11.40291153 13.96669784 11.82358754  
Fe 8.37866365 5.95289783 7.89181803  
Fe 9.67286428 5.89212307 9.92251974  
Fe 10.96044067 5.83908484 11.91917078  
Fe 6.23325092 7.73863490 12.06628564  
Fe 6.30784265 10.16937574 11.69642040  
Fe 6.52457531 12.61056119 11.97264058  
Fe 13.15797768 7.29282434 7.79391357  
Fe 13.29173988 9.74890229 7.81641098  
Fe 13.39479700 12.20772847 7.74376455  
Fe 8.00189311 8.90729448 13.45506189  
Fe 8.17833772 11.34075368 13.40460721  
Fe 13.62312319 8.49338459 9.89847745  
Fe 13.75094003 10.98321480 9.87375287  
Fe 5.93607990 8.83510549 9.78885984  
Fe 6.06625294 11.43649726 9.72240548  
Fe 11.53454925 8.57711437 6.52988048  
Fe 11.65040102 11.04804404 6.50237406  
Fe 12.85793494 11.74765377 12.11368631  
Fe 10.56463927 12.12387866 13.38262549  
Fe 9.37790422 11.93303494 6.49812085  
Fe 7.26269820 12.04535122 7.70028166  
Fe 12.63688320 7.86528297 12.15510903  
Fe 10.25596954 7.81190456 13.44525384  
Fe 9.18801847 7.90360312 6.56489506  
Fe 7.05982657 8.01401515 7.77620665  
Fe 7.61801290 13.34232987 9.80964910  
Fe 9.00618989 13.38629509 11.82542286  
Fe 7.27642648 6.77919697 9.92982505  
Fe 8.62970345 6.69479417 11.92723295  
Fe 11.13057237 13.11544726 7.81145534  
Fe 12.46288723 13.00609247 9.93084437  
Fe 10.81140825 6.60316042 7.90193238  
Fe 12.13277462 6.62586995 10.00577266  
C 11.17550026 5.97515237 13.79067794

C 12.36419396 6.72560212 13.72386413  
C 13.65287281 9.02796342 13.60500990  
C 13.74086615 10.48966438 13.59121740  
C 12.77126022 12.93743208 13.66063070  
C 11.71862765 13.85985759 13.69373442  
C 8.97172483 13.95609019 13.60550291  
C 7.67671055 13.39222497 13.48307510  
C 6.07714594 11.02138601 13.46125369  
C 5.97517459 9.56544338 13.52627386  
C 8.40118074 6.31897632 13.75771113  
C 7.16649441 7.00870624 13.67349474  
C 10.46285799 5.88828780 15.02505842  
C 9.03611277 6.04745771 15.00316888  
C 13.00467841 7.11953957 14.94460288  
C 11.18316717 6.07588033 16.23973049  
C 12.49327767 6.65900844 16.19486950  
C 13.73016993 8.34768237 14.88788675  
C 13.89867737 11.17431359 14.86314681  
C 14.04614495 9.03558784 16.09242685  
C 14.12579010 10.47101537 16.07911156  
C 13.33537018 12.48285887 14.89990441  
C 11.03346334 14.11351689 14.92521489  
C 12.88085682 13.03210252 16.13585204  
C 11.68265057 13.82507193 16.16232717  
C 9.60334921 14.19413851 14.86383055  
C 7.07229004 12.93899815 14.71948953  
C 8.84934663 14.05319650 16.06813508  
C 7.56178248 13.43572553 15.97924908  
C 6.26660990 11.73584397 14.69883966  
C 6.05936241 8.91892644 14.81216857  
C 5.96389634 11.09594866 15.95318852  
C 5.87846771 9.67590017 16.02293955  
C 6.69608079 7.62478541 14.90270003  
C 8.35168844 6.35510357 16.22533297  
C 7.17926348 7.16715169 16.18104401  
C 10.46590413 6.04114049 17.47365837  
C 9.03532657 6.18887984 17.47110465  
C 13.04881261 7.18219612 17.40282021  
C 11.18694470 6.19275642 18.68921033  
C 12.50805377 6.76122672 18.65291211  
C 13.86246807 8.36449239 17.35216866  
C 14.00979082 11.18062481 17.32334783  
C 14.15123011 9.04998079 18.56857335  
C 14.22575651 10.48738735 18.55512696  
C 13.33642284 12.44532896 17.35364753  
C 10.95205920 13.97736422 17.38754908  
C 12.82789087 12.93535897 18.59706766  
C 11.59344551 13.67119977 18.63078677  
C 9.52626229 14.12147142 17.34561674  
C 6.92029858 13.01872509 17.17309321  
C 8.77611290 13.97093671 18.55531959  
C 7.41377890 13.52012089 18.42643122  
C 6.08972526 11.84553325 17.15580749  
C 5.99891411 9.02686049 17.30192351  
C 5.72906771 11.21543545 18.39212560

C 5.76435305 9.77464457 18.49651502  
C 6.69260567 7.77199668 17.38479193  
C 8.36515830 6.50324165 18.69152173  
C 7.16870967 7.31026023 18.65706646  
C 10.47972013 6.10780955 19.93013060  
C 9.05000912 6.28038457 19.93270837  
C 13.11821453 7.21796988 19.86319310  
C 12.58210084 6.75870974 21.11267939  
C 11.23803567 6.20563209 21.14668259  
C 13.96921289 8.37504734 19.82153866  
C 14.13414092 11.20768558 19.78512853  
C 14.30550939 9.06683954 21.03749478  
C 14.41077046 10.51700233 21.01799297  
C 13.38463195 12.43627546 19.80604023  
C 10.86924591 13.77379759 19.86904397  
C 12.88273371 12.94443877 21.05017509  
C 11.54179245 13.47968503 21.10287088  
C 9.43714699 13.89288918 19.84031567  
C 6.73160802 13.12303036 19.57556299  
C 8.68976407 13.52312562 21.02947670  
C 7.32882882 13.18908270 20.87023213  
C 5.85399174 11.99024368 19.55520878  
C 5.95959081 9.16122702 19.78809181  
C 5.87167185 9.98645902 20.97609692  
C 5.87756820 11.39749207 20.84487039  
C 6.67239063 7.90779629 19.86701105  
C 7.18820752 7.43570234 21.13463594  
C 8.36802617 6.58460349 21.16203074  
C 7.92819091 9.50165548 23.92661628  
C 7.74817839 8.15094521 23.45791863  
C 6.35323960 9.49207285 22.20679143  
C 6.88516421 8.16945094 22.31010200  
C 7.03711403 10.32836287 23.16493977  
C 10.01975754 7.65346591 24.17904644  
C 8.80596006 7.27082071 23.52143948  
C 10.25094996 8.99500721 24.61201724  
C 9.17799679 9.97109882 24.38896386  
C 13.80805015 9.18561087 23.48479680  
C 14.00636630 10.56582782 23.47791996  
C 12.68679328 8.61384021 24.19515154  
C 11.63562767 9.44660250 24.71017587  
C 11.88250230 10.85669979 24.71693129  
C 13.11255888 11.38088458 24.24213261  
C 14.00418604 8.43189681 22.26502236  
C 14.27112245 11.23647169 22.22258425  
C 11.06967217 6.90191324 23.53171147  
C 10.52170120 6.25096591 22.36083997  
C 9.10549736 6.45924150 22.36340269  
C 13.13470046 7.29204718 22.29670390  
C 12.35965610 7.38830230 23.50969023  
C 9.51666364 11.36389343 24.07468048  
C 10.83295632 11.78260174 24.30479578  
C 7.40209840 11.64868912 22.80158905  
C 6.71878360 12.19741158 21.69671327  
C 13.50352790 12.47093882 22.23155465

C 8.70922511 12.14716189 23.14794464  
C 10.77446844 13.27940349 22.32057416  
C 12.83470009 12.57071840 23.47214167  
C 11.43603984 12.80348775 23.47916719  
C 9.35527767 13.08068261 22.23683619

**Fe<sub>54</sub>S with CNT(10,0)**

Fe 9.80924202 10.11697086 7.51115261  
Fe 11.89647364 10.17460487 8.54368693  
Fe 9.82181614 10.11357896 9.79556689  
Fe 9.78761713 10.12800396 5.21470764  
Fe 7.75672598 10.05207259 6.52919810  
Fe 9.10972605 12.04499347 6.52424125  
Fe 10.40061348 12.10862859 8.55771287  
Fe 9.23734521 8.14777654 6.50695156  
Fe 10.51843094 8.16213992 8.56532604  
Fe 8.18072693 8.82836015 8.56346264  
Fe 8.10394531 11.28069664 8.56203969  
Fe 11.49098527 8.96515831 6.49079208  
Fe 11.42156379 11.37601281 6.50136837  
Fe 14.07242143 10.20602018 9.45760827  
Fe 11.97738889 10.41663874 10.93682769  
S 9.84687338 10.11236147 12.03297984  
Fe 9.75673549 10.14864441 2.87108397  
Fe 7.63757131 10.04965511 4.15254212  
Fe 5.56368678 9.95515678 5.36113861  
Fe 8.37709307 14.11275971 5.34527586  
Fe 9.69949178 14.15981133 7.46882623  
Fe 11.10501270 14.14151032 9.56644012  
Fe 8.66922226 6.04279777 5.31936106  
Fe 9.92275842 6.08361981 7.41909309  
Fe 11.13958462 6.11334696 9.53379901  
Fe 6.42704843 7.57832169 9.55437926  
Fe 6.33087716 10.01255378 9.52665489  
Fe 6.37419286 12.57456005 9.51248702  
Fe 13.25388797 7.70351186 5.31575764  
Fe 13.19795283 10.22269288 5.35906019  
Fe 13.13974733 12.71035863 5.30149284  
Fe 8.26683278 8.61114982 10.98545713  
Fe 7.90813084 11.12017255 10.96635276  
Fe 13.67251446 8.96692132 7.41526601  
Fe 13.61086995 11.47670878 7.38437283  
Fe 5.99905269 8.74538845 7.44443546  
Fe 5.91673868 11.24657025 7.45779276  
Fe 11.54773886 8.95190489 4.10612887  
Fe 11.44691220 11.46054776 4.11300723  
Fe 12.59928798 12.24691848 9.52457000  
Fe 10.20445318 12.24312253 10.97551938  
Fe 9.03426632 12.13893071 4.14563280  
Fe 6.96495162 12.03482926 5.43142586  
Fe 12.67247978 8.14211382 9.46878047  
Fe 10.75611369 8.16445893 10.97991290  
Fe 9.19780468 8.08703049 4.11210669  
Fe 7.12332886 8.00590559 5.41413009

Fe 7.35632520 13.34248665 7.43702598  
Fe 8.65688738 13.41377097 9.55393640  
Fe 7.54983271 6.75349839 7.45283195  
Fe 8.81553744 6.74783618 9.56977452  
Fe 10.74721367 13.40243549 5.41279194  
Fe 12.12053747 13.45977732 7.42546884  
Fe 10.95658858 6.90188077 5.35067946  
Fe 12.26344078 6.93486444 7.44297462  
C 13.00803311 12.27098897 11.43679751  
C 13.89637697 9.99057561 11.38901023  
C 13.66514711 11.20671114 12.15193086  
C 11.19676803 13.91687365 11.51262591  
C 12.23167179 13.20535250 12.23227566  
C 8.76155447 13.80859423 11.46789795  
C 9.95298519 14.05608395 12.24801940  
C 6.61884226 12.59715175 11.44124608  
C 7.58962210 13.36996532 12.19376322  
C 5.96514688 10.22885308 11.42472345  
C 6.05385412 11.46876210 12.16530461  
C 6.48244748 7.82137917 11.49499157  
C 6.02796560 9.00131982 12.19816612  
C 8.52538394 6.49354647 11.49509669  
C 7.40560092 6.99380155 12.25486333  
C 10.95683766 6.21898477 11.46741046  
C 9.72952523 6.18878852 12.24089641  
C 12.86906673 7.75326397 11.37829795  
C 12.07758410 6.82846538 12.15689607  
C 13.59998604 8.76701556 12.11422724  
C 12.24814117 13.17172709 13.66141655  
C 13.68847460 11.18252362 13.59012295  
C 13.11118533 12.24974641 14.34291345  
C 9.93697185 13.99294971 13.69011264  
C 11.14917020 13.73143727 14.40956423  
C 7.55457943 13.39572027 13.61833560  
C 8.69434223 13.84038422 14.37306496  
C 6.01269398 11.48214813 13.59559372  
C 6.59061477 12.58693092 14.30647497  
C 5.98449160 9.02086862 13.62379584  
C 5.78636727 10.26168371 14.30734945  
C 7.43943117 7.04961075 13.69718858  
C 6.55618280 7.93858369 14.38411872  
C 9.74889282 6.20583358 13.67051100  
C 8.55353179 6.50678661 14.41212844  
C 12.11705351 6.83575278 13.59577318  
C 11.00586950 6.34474034 14.35399750  
C 13.69300138 8.72731054 13.52828404  
C 13.07712664 7.64723905 14.25787814  
C 13.94634363 9.94940075 14.25735359  
C 11.13062581 13.65317851 15.83527186  
C 13.12481855 12.20409291 15.77244098  
C 12.23649705 13.03928970 16.53011859  
C 8.66935396 13.80798756 15.80283052  
C 9.89477534 13.87841383 16.54569547  
C 6.53606159 12.61114873 15.72021408  
C 7.48369228 13.38169434 16.48343866

C 5.71609721 10.28328151 15.72433744  
C 5.83202251 11.55137218 16.38913801  
C 6.57168243 7.99257721 15.81001896  
C 5.94510998 9.08853211 16.48948482  
C 8.58362602 6.56677630 15.84287147  
C 7.48342458 7.16926479 16.55295319  
C 11.04153380 6.38963781 15.77904676  
C 9.82295888 6.32423402 16.53863531  
C 13.16276342 7.61002418 15.67351387  
C 12.22937672 6.83556916 16.44501439  
C 14.01653667 9.92403150 15.66940342  
C 13.89325226 8.65454350 16.33552688  
C 13.77341105 11.11621399 16.43955493  
C 9.87484836 13.82801312 17.97528931  
C 12.23333537 12.98057681 17.95755213  
C 11.12419079 13.58604703 18.65979053  
C 7.46062417 13.33776751 17.91890934  
C 8.63132627 13.65989864 18.69144097  
C 5.75603167 11.58136827 17.77507466  
C 6.45384644 12.56501958 18.54931298  
C 5.95811051 9.14298488 17.92483629  
C 5.67347398 10.38077225 18.55185326  
C 7.50315415 7.22569427 17.98309665  
C 6.65344272 8.14996910 18.69902454  
C 9.85834860 6.37467586 17.96650643  
C 8.62010679 6.62006803 18.66903882  
C 12.26905751 6.87476658 17.88137974  
C 11.11125093 6.54714215 18.66792396  
C 13.98004175 8.62413019 17.71909586  
C 13.28382340 7.64433758 18.49892538  
C 13.77746516 11.06177360 17.87582969  
C 14.07424342 9.82455686 18.49797331  
C 13.09020618 12.05175493 18.65952627  
C 6.70138984 9.70047938 20.70227601  
C 7.54514517 10.16660726 21.79518057  
C 6.14290522 10.68253371 19.86607269  
C 6.62817553 12.03592148 19.86345652  
C 8.03929144 11.54551219 21.79314201  
C 7.68391788 12.44055732 20.69916630  
C 8.30780050 7.84108849 22.02336071  
C 7.69357612 7.46197835 20.80549650  
C 6.85307611 8.36960306 20.12128878  
C 8.30741294 9.17568922 22.48823171  
C 10.54037711 8.37145892 22.47506273  
C 11.74984786 8.65293354 21.76862721  
C 9.67162972 9.45399423 22.92588794  
C 12.24583709 10.03211425 21.76625500  
C 10.13463880 10.74268322 22.92357208  
C 11.49275137 11.02210858 22.46982944  
C 13.13116408 8.16917984 19.81713789  
C 13.62103200 9.52160027 19.81607400  
C 9.89811504 6.66781058 20.79077595  
C 8.64697905 6.66741825 20.06490895  
C 9.68175119 7.34647494 22.01346766  
C 11.11550481 6.83586737 20.09118308

C 12.08780687 7.76204998 20.66560272  
C 13.07228058 10.50163848 20.66214160  
C 12.91161301 11.83206265 20.08429433  
C 9.25916318 11.82521771 22.48436129  
C 12.08034562 12.73922113 20.78078879  
C 11.11559434 13.53596133 20.05447467  
C 11.48432571 12.35769793 22.00491917  
C 10.10919462 12.85113717 22.01444988  
C 9.87472009 13.53373766 20.79687735  
C 8.64679720 13.36957904 20.11545158

### **Fe<sub>54</sub>S with CNT(6,6)**

Fe 9.88705642 9.91919386 9.92145335  
Fe 11.94309027 9.85652082 10.99790256  
Fe 9.80618708 9.96298999 12.23515429  
Fe 9.88101073 9.90156551 7.65367394  
Fe 7.84683894 9.96714432 8.91106506  
Fe 9.31707682 11.87907423 8.91434081  
Fe 10.60224374 11.86713664 10.97628833  
Fe 9.20302393 7.97778302 8.95260348  
Fe 10.46997685 7.96321942 11.01754092  
Fe 8.15495153 8.76045243 10.97821409  
Fe 8.23307179 11.21922282 10.94801986  
Fe 11.49543088 8.66725423 8.92809699  
Fe 11.57061306 11.05299445 8.90623139  
Fe 14.30809462 9.74388201 11.80767445  
Fe 11.85049431 9.88874823 13.41363297  
S 9.75322606 10.01665681 14.47661591  
Fe 9.83160340 9.89653622 5.21837229  
Fe 7.77392354 9.93350479 6.49618304  
Fe 5.67039264 9.98929693 7.78828480  
Fe 8.71241352 13.96497678 7.78375356  
Fe 10.04768837 13.97431433 9.81232872  
Fe 11.37630398 13.95729606 11.83069254  
Fe 8.51142602 5.90200786 7.84493878  
Fe 9.79369778 5.87383081 9.89125293  
Fe 11.04520568 5.84096067 11.93800113  
Fe 6.31838607 7.56267110 12.00495153  
Fe 6.32456365 10.02655159 11.76220476  
Fe 6.50099530 12.52189524 11.97498632  
Fe 13.21809804 7.34088825 7.76306088  
Fe 13.30357208 9.79732554 7.77040894  
Fe 13.36609917 12.24936293 7.72233885  
Fe 7.96081632 8.83570449 13.42628041  
Fe 8.13124911 11.31023629 13.39125878  
Fe 13.66780932 8.53453056 9.86970872  
Fe 13.75707107 11.01073447 9.84605327  
Fe 6.00043326 8.73625415 9.80538491  
Fe 6.06442883 11.32381669 9.76399799  
Fe 11.56205299 8.60913077 6.49749018  
Fe 11.62519317 11.08545297 6.47372697  
Fe 12.86615840 11.77582766 12.11523369  
Fe 10.55094627 12.14532840 13.35595489  
Fe 9.32337125 11.93180930 6.49844510



Fe 7.21988323 11.98189570 7.72223669  
Fe 12.67807012 7.86949729 12.17318679  
Fe 10.30105587 7.80298205 13.42514858  
Fe 9.22525136 7.88677019 6.53455404  
Fe 7.10648239 7.93474369 7.77188999  
Fe 7.57562268 13.27805185 9.81138817  
Fe 8.96153032 13.34693164 11.81613831  
Fe 7.39625139 6.70005263 9.90121436  
Fe 8.72333306 6.65587789 11.93179323  
Fe 11.08274871 13.12192308 7.80269380  
Fe 12.43147024 13.01948326 9.92083673  
Fe 10.89643301 6.61394010 7.85787425  
Fe 12.20742820 6.65818599 9.98717681  
C 11.16384202 5.97923614 13.82253069  
C 12.35426631 6.73427125 13.75209703  
C 13.71897384 9.03340694 13.63986279  
C 13.81486477 10.48890148 13.62454871  
C 12.77823211 12.93714916 13.67946210  
C 11.71609446 13.84751155 13.70324643  
C 8.95642196 13.90149446 13.60930131  
C 7.65260288 13.35147110 13.49162348  
C 6.03457787 11.02237080 13.49143628  
C 5.93713606 9.58523602 13.58336454  
C 8.36957519 6.37049193 13.78177870  
C 7.09917628 7.00069681 13.72276007  
C 10.43577510 5.92416447 15.05230854  
C 9.00888443 6.09188551 15.03059970  
C 12.99143487 7.13746531 14.97465069  
C 11.15559846 6.11266248 16.26979328  
C 12.46850736 6.68868160 16.22549278  
C 13.74139583 8.35240551 14.92266243  
C 13.92657646 11.18540028 14.89154886  
C 14.04824854 9.04637319 16.12799685  
C 14.13567824 10.48191213 16.11168468  
C 13.34116879 12.48570542 14.91962834  
C 11.02011449 14.09360997 14.93114966  
C 12.87274283 13.03251438 16.15218757  
C 11.66874773 13.81625434 16.17101883  
C 9.58773823 14.16019198 14.86587402  
C 7.04222195 12.93278751 14.73710101  
C 8.83550831 14.03433730 16.07358080  
C 7.54186898 13.42988125 15.99052491  
C 6.22120168 11.74322561 14.72743444  
C 5.99895876 8.92200885 14.85354962  
C 5.92250492 11.10705997 15.98111514  
C 5.83005811 9.68633826 16.05837302  
C 6.63434558 7.62646595 14.94680264  
C 8.32526349 6.38941429 16.25553017  
C 7.14134299 7.18785685 16.21875080  
C 10.43937980 6.07864794 17.50507463  
C 9.00918575 6.22388485 17.50289398  
C 13.02782415 7.20652266 17.43506576  
C 11.16050933 6.22703247 18.72209191  
C 12.48376552 6.79003029 18.68564068  
C 13.85056283 8.38203645 17.38751658

C 14.00830704 11.19487758 17.35223493  
C 14.13678942 9.06973275 18.60328023  
C 14.21746984 10.50582314 18.58658546  
C 13.33058455 12.45651854 17.37407328  
C 10.93655518 13.97098623 17.39509467  
C 12.81904496 12.95094750 18.61405318  
C 11.57967306 13.67878510 18.64092610  
C 9.51145644 14.11408026 17.35148626  
C 6.89819501 13.02662275 17.18926229  
C 8.76049301 13.97854026 18.56285471  
C 7.39478159 13.53416613 18.43928101  
C 6.06023315 11.86045416 17.18048672  
C 5.96115447 9.04533446 17.34034695  
C 5.69843467 11.23885608 18.42051561  
C 5.73100391 9.79857312 18.53155038  
C 6.66083195 7.79583454 17.42311640  
C 8.34146255 6.53679077 18.72573197  
C 7.14404340 7.34180605 18.69386020  
C 10.45435343 6.14389153 19.96455034  
C 9.02571152 6.31711417 19.96778589  
C 13.09451048 7.24579425 19.89715930  
C 12.55549510 6.79300977 21.14727721  
C 11.21124786 6.24202766 21.18193221  
C 13.94908326 8.39987455 19.85715654  
C 14.12445076 11.23035735 19.81326048  
C 14.28622706 9.09435631 21.07118701  
C 14.39745296 10.54374138 21.04828116  
C 13.37454591 12.45851510 19.82669153  
C 10.85490701 13.78784466 19.87833714  
C 12.86910312 12.96997182 21.06810776  
C 11.52639974 13.50262906 21.11525633  
C 9.42265818 13.90791733 19.84798393  
C 6.71157456 13.14932176 19.59152436  
C 8.67425232 13.54815069 21.04006810  
C 7.31155502 13.21938439 20.88500669  
C 5.82969907 12.01818821 19.57867685  
C 5.93192427 9.19204483 19.82391217  
C 5.84661795 10.02204011 21.00875492  
C 5.85371142 11.43183016 20.87182247  
C 6.64790815 7.94052451 19.90237768  
C 7.16349219 7.47135773 21.17031827  
C 8.34311116 6.62103293 21.19747122  
C 7.90355304 9.54315050 23.95737609  
C 7.72284583 8.19105136 23.49101299  
C 6.32764136 9.53063242 22.24053989  
C 6.85944119 8.20755051 22.34430223  
C 7.01406407 10.36901441 23.19465284  
C 9.99515892 7.69452470 24.21100803  
C 8.78069931 7.31160189 23.55498856  
C 10.22686444 9.03600671 24.64131336  
C 9.15491204 10.01231477 24.41646941  
C 13.78500464 9.22138889 23.51840121  
C 13.98574903 10.60123217 23.50760812  
C 12.66250977 8.65160011 24.22877822  
C 11.61186310 9.48691222 24.74055180

C 11.85902504 10.89748460 24.74143325  
C 13.09020899 11.41926806 24.26650345  
C 13.98165221 8.46394289 22.30022584  
C 14.25576608 11.26733926 22.25068767  
C 11.04439562 6.94118387 23.56561046  
C 10.49549608 6.28848770 22.39622825  
C 9.07974643 6.49785544 22.39920273  
C 13.10810178 7.32728634 22.33114792  
C 12.33431787 7.42570311 23.54414908  
C 9.49511609 11.40402698 24.09703216  
C 10.81178045 11.82291204 24.32526969  
C 7.38142071 11.68725476 22.82446664  
C 6.69904164 12.23316682 21.71821695  
C 13.48800161 12.50209247 22.25306173  
C 8.68991151 12.18405003 23.16669816  
C 10.75755603 13.30842355 22.33378028  
C 12.81611860 12.60679451 23.49220310  
C 11.41726678 12.84035440 23.49645299  
C 9.33865427 13.11109310 22.24977929

### **Fe<sub>52</sub>S<sub>3</sub> with CNT(10,0)**

Fe 9.82073436 10.16280927 7.60067649  
Fe 12.00693162 10.06991729 8.52443678  
Fe 9.69967663 10.18526274 9.98608596  
Fe 9.77194960 10.18960871 5.30306666  
Fe 7.74654972 10.19879385 6.63274351  
Fe 9.17403077 12.12965027 6.59907970  
Fe 10.48256343 12.21444380 8.59387399  
Fe 9.17720565 8.20525003 6.62311535  
Fe 10.50335148 8.16694095 8.71610622  
Fe 8.11398778 8.94801773 8.63866491  
Fe 8.14192275 11.45782018 8.71730327  
Fe 11.42664823 8.92384474 6.50111715  
Fe 11.49111493 11.35637580 6.55362997  
Fe 14.08831872 10.01749171 9.44422016  
S 11.53063715 11.29346477 10.37847819  
Fe 11.88374330 9.22780558 10.83499151  
Fe 9.73337421 10.20258114 2.93789369  
Fe 7.63882528 10.19107181 4.22235599  
Fe 5.55998012 10.16815869 5.40354972  
Fe 8.52569938 14.22565842 5.36871807  
Fe 9.84897090 14.28185425 7.42823557  
Fe 11.23331394 14.16632336 9.51603969  
Fe 8.47515399 6.11506610 5.45777504  
Fe 9.73352473 6.10367955 7.50599519  
Fe 10.95814426 6.03507538 9.60159773  
Fe 6.42292027 7.65520139 9.55921270  
Fe 6.26374874 10.21015153 9.45809647  
Fe 6.40414299 12.68270651 9.49393186  
Fe 13.08860447 7.58024636 5.22695257  
Fe 13.17619457 10.09510391 5.35731784  
Fe 13.26432065 12.61127370 5.32776854  
Fe 7.78010073 9.33134440 10.98977614  
S 9.09538387 10.70008480 12.15974373

Fe 13.67175453 8.74773653 7.31812879  
Fe 13.75932132 11.34099331 7.34091692  
Fe 5.92225182 8.92022543 7.48250939  
Fe 5.93352677 11.47192049 7.43484707  
Fe 11.45367302 8.92633092 4.10588859  
Fe 11.50167330 11.41544887 4.16431373  
Fe 13.07256533 12.39720266 9.43542201  
Fe 9.78056276 12.41078990 10.93364321  
Fe 9.14038694 12.22041758 4.19026487  
Fe 7.03813437 12.20860902 5.41770541  
Fe 12.79730116 7.78160729 9.39204264  
S 9.83636841 8.23758269 10.88691444  
Fe 9.09915461 8.18595724 4.20924794  
Fe 7.06179496 8.17828020 5.49560086  
Fe 7.41820114 13.49294717 7.40484742  
Fe 8.67810574 13.68223304 9.43218772  
Fe 7.39296710 6.84675320 7.52801109  
Fe 8.68211373 6.72475789 9.73033142  
Fe 10.87084072 13.38882463 5.43765447  
Fe 12.28819289 13.46144725 7.37950896  
Fe 10.77639330 6.83235859 5.30536395  
Fe 12.03228437 6.83323598 7.35471067  
C 13.16852689 12.40611166 11.44614285  
C 13.73240085 9.93042375 11.38671895  
C 13.63575628 11.21321284 12.12350768  
C 11.11697846 13.86735880 11.46616433  
C 12.25040956 13.25549552 12.19007598  
C 8.63216525 13.96701538 11.40887683  
C 9.87463900 14.10393464 12.19403797  
C 6.58726787 12.53937502 11.39588685  
C 7.48973842 13.39343695 12.12151310  
C 5.97330956 10.11497754 11.38801181  
C 6.08378480 11.39069675 12.10212278  
C 6.67401557 7.72730054 11.49969584  
C 6.09318325 8.88120660 12.17274101  
C 8.52861991 6.08593992 11.57406649  
C 7.48635881 6.78348608 12.27941962  
C 10.99222351 5.92872245 11.54783508  
C 9.75248782 5.81946265 12.30463024  
C 12.90050342 7.56593744 11.38488956  
C 12.07504899 6.62977171 12.17942557  
C 13.52456848 8.68198825 12.11571129  
C 12.20829477 13.18874787 13.61226839  
C 13.63590550 11.17933572 13.54562360  
C 13.06757898 12.26462815 14.30135781  
C 9.86791943 13.99837100 13.63282533  
C 11.07995437 13.72215077 14.34708154  
C 7.49518145 13.36870020 13.55301581  
C 8.62203168 13.84384575 14.31266432  
C 6.02931529 11.39389391 13.52173584  
C 6.58132949 12.51030398 14.23904093  
C 6.09409944 8.92357738 13.61098628  
C 5.83883275 10.16362912 14.26039136  
C 7.48425515 6.87599665 13.70588975  
C 6.64073343 7.83941412 14.37141706

C 9.77220675 5.97168881 13.73066892  
C 8.57546130 6.31555680 14.45628452  
C 12.11669883 6.69788966 13.61117822  
C 11.02236665 6.19510479 14.39960431  
C 13.56320062 8.69858767 13.54630137  
C 13.02697113 7.58812687 14.27554318  
C 13.82141173 9.93022882 14.23588537  
C 11.06075079 13.65305861 15.77438015  
C 13.06167185 12.21614621 15.72655237  
C 12.16920970 13.05367669 16.47898896  
C 8.60142599 13.79785978 15.73848993  
C 9.82478276 13.87910949 16.48185231  
C 6.51229219 12.54004606 15.65442731  
C 7.42664913 13.34145312 16.41851630  
C 5.75013287 10.19542634 15.67308728  
C 5.82649358 11.47228881 16.32755332  
C 6.62891216 7.90812332 15.79811278  
C 5.98971146 9.01070116 16.45355264  
C 8.60186346 6.43378289 15.88006807  
C 7.50796098 7.07353463 16.57017536  
C 11.05550981 6.28724664 15.82535278  
C 9.84026752 6.21917053 16.58795170  
C 13.12375242 7.57891629 15.68921957  
C 12.22714372 6.78146923 16.48292782  
C 13.91558079 9.92345611 15.64867279  
C 13.81720567 8.66187755 16.32964467  
C 13.69933022 11.12827356 16.40698957  
C 9.80287034 13.83479733 17.91154793  
C 12.16543396 13.00645370 17.90596881  
C 11.05154774 13.61026044 18.60130197  
C 7.39934047 13.30481629 17.85279852  
C 8.56059238 13.65268132 18.62640544  
C 5.73489150 11.51392571 17.71033467  
C 6.40523295 12.51724105 18.48162703  
C 5.97540041 9.07805233 17.88982147  
C 5.66578617 10.31874359 18.49874828  
C 7.51544923 7.15808166 17.99697141  
C 6.66271322 8.09939514 18.68852442  
C 9.87071052 6.31245776 18.01371696  
C 8.62799923 6.56734485 18.70496987  
C 12.26699951 6.85516999 17.91635304  
C 11.11777143 6.52238833 18.71378694  
C 13.92522676 8.65054165 17.71406909  
C 13.26117056 7.66651645 18.51620103  
C 13.71159955 11.09093192 17.84136509  
C 14.01240099 9.86058560 18.47583295  
C 13.02520579 12.08799307 18.61846127  
C 6.67423831 9.67914447 20.66983302  
C 7.50331170 10.17249867 21.76239538  
C 6.11294924 10.64218912 19.81442389  
C 6.57797512 12.00390342 19.80208290  
C 7.98275104 11.55716948 21.74581737  
C 7.62120365 12.43513773 20.63955699  
C 8.28975812 7.85855116 22.03200498  
C 7.68582847 7.45217158 20.81817180

C 6.84496617 8.34201220 20.10973943  
C 8.27279114 9.20128188 22.47389273  
C 10.51378789 8.42248457 22.48195047  
C 11.71967516 8.70852437 21.77099368  
C 9.63201086 9.50206817 22.91283654  
C 12.19869311 10.09337442 21.74852702  
C 10.08065174 10.79531990 22.89502621  
C 11.43673371 11.08449472 22.44022008  
C 13.10551196 8.20938807 19.82595692  
C 13.57399843 9.57062451 19.80224909  
C 9.89739441 6.67873165 20.83011446  
C 8.64906989 6.64989280 20.09842871  
C 9.66918359 7.37754440 22.03867911  
C 11.11434894 6.84712179 20.12973526  
C 12.07028780 7.80179158 20.68433555  
C 13.02034275 10.55590516 20.63689518  
C 12.84771374 11.88012373 20.04448282  
C 9.19507854 11.86129183 22.43877093  
C 12.00956920 12.78814982 20.73211873  
C 11.04016690 13.57036016 19.99610270  
C 11.41514629 12.41503831 21.95992464  
C 10.03520637 12.89269290 21.95964493  
C 9.79735312 13.55975016 20.73455244  
C 8.57428138 13.37245894 20.05123766

#### **Fe<sub>52</sub>S<sub>3</sub> with CNT(6,6)**

Fe 9.82587604 9.99978052 10.00557387  
Fe 11.90833904 10.01288230 11.07963034  
Fe 9.64551405 10.18075545 12.42725333  
Fe 9.85823500 9.92434912 7.74726922  
Fe 7.79619946 9.91785948 8.97034251  
Fe 9.16931659 11.89597333 8.92360120  
Fe 10.40284494 12.02011384 10.99250073  
Fe 9.24923399 8.00385520 9.07068167  
Fe 10.55005546 8.07884362 11.12966211  
Fe 8.15357628 8.79199462 11.06845648  
Fe 8.09464098 11.23237547 10.93623478  
Fe 11.52399692 8.79188720 9.01996985  
Fe 11.47100275 11.20492813 8.99129417  
Fe 14.10852540 10.12049077 11.89144212  
S 11.70976628 10.60132856 13.18008692  
Fe 10.76850290 9.44882249 14.84322345  
Fe 9.87547019 9.86161008 5.27918097  
Fe 7.78339924 9.80830298 6.53948830  
Fe 5.63376638 9.81834324 7.77709152  
Fe 8.46319247 13.91699441 7.69350243  
Fe 9.76731417 14.06498261 9.69567112  
Fe 11.01315748 14.17453795 11.86719327  
Fe 8.65146497 5.86166424 8.03091196  
Fe 9.91903508 5.97953843 10.08762856  
Fe 11.22147879 6.00548439 12.04182651  
Fe 6.35871733 7.50594905 12.02136735  
Fe 6.24433384 9.99103369 11.71995562  
Fe 6.40877060 12.43972111 11.95248089

Fe 13.30363130 7.51550896 7.86676430  
Fe 13.28391596 10.00666650 7.88774390  
Fe 13.23418650 12.48896237 7.85764126  
Fe 7.87831980 8.92857406 13.51877270  
S 8.94032711 10.72272502 14.57312280  
Fe 13.71606500 8.78041745 9.92672188  
Fe 13.62506786 11.31102806 9.93869639  
Fe 5.98703863 8.62598664 9.81497761  
Fe 5.91024332 11.22048481 9.71064795  
Fe 11.60956880 8.67752445 6.59186067  
Fe 11.56294886 11.13537944 6.57393394  
Fe 12.60950716 12.18481004 11.95518222  
Fe 10.23988811 12.30324442 13.43951957  
Fe 9.20934019 11.87089484 6.48979756  
Fe 7.08454749 11.85019987 7.66978346  
Fe 12.82972760 7.95493758 12.16551691  
S 9.97879726 8.12100080 13.23921182  
Fe 9.30156994 7.86651372 6.65907032  
Fe 7.16458725 7.82991464 7.85767394  
Fe 7.31822120 13.24630233 9.68731116  
Fe 8.64278304 13.42054795 11.66964211  
Fe 7.48833424 6.66775480 10.02896874  
Fe 8.76938931 6.69001568 12.11406130  
Fe 10.86994575 13.18430449 7.73221291  
Fe 12.13295395 13.35303813 9.86291092  
Fe 10.98182558 6.67462015 7.97409822  
Fe 12.30161262 6.77358078 10.00097042  
C 11.19649360 5.74594225 13.88236759  
C 12.36127238 6.50490957 13.73602528  
C 14.08194069 8.95156933 13.63998379  
C 14.39955531 10.31206017 13.71214553  
C 13.09157010 12.96830824 13.60351608  
C 11.86903784 13.68589628 13.56076607  
C 8.93719682 13.95356868 13.46944703  
C 7.62371393 13.40912437 13.38988270  
C 5.94192233 11.00673341 13.42043476  
C 5.87980560 9.58516033 13.53400916  
C 8.25651654 6.02981014 13.80966479  
C 7.15447928 6.91874416 13.72136395  
C 10.39353783 5.71858255 15.05036361  
C 8.95042467 5.84377867 15.03124695  
C 12.91648655 7.10338374 14.91393260  
C 11.09444855 6.04621049 16.25246465  
C 12.37064066 6.69656346 16.18792540  
C 13.76082855 8.28053396 14.86799261  
C 14.20788651 11.12455983 14.85709575  
C 14.03380931 8.98078549 16.09736568  
C 14.22544400 10.40164710 16.08820441  
C 13.57323690 12.42513812 14.82123212  
C 11.09433448 13.87901469 14.77082666  
C 12.96895391 12.90492434 16.04343509  
C 11.73006687 13.62086888 16.03417879  
C 9.65234109 14.04029638 14.71512897  
C 6.99870040 12.96155646 14.59895752  
C 8.88844173 13.93031786 15.93294054

C 7.55341096 13.42092256 15.84750647  
C 6.15680683 11.77695468 14.61049559  
C 6.04304981 8.91757701 14.79575424  
C 5.90244869 11.13314313 15.87159640  
C 5.86669490 9.70773007 15.98560825  
C 6.70323687 7.62735382 14.90210846  
C 8.30039496 6.29954472 16.24059088  
C 7.17322751 7.17740511 16.18725499  
C 10.39528273 6.02013874 17.50301816  
C 8.97002300 6.16759729 17.49931446  
C 12.94915686 7.18746083 17.40436727  
C 11.11631007 6.19292891 18.71259310  
C 12.43771126 6.75647878 18.66442544  
C 13.80207330 8.33558593 17.35913909  
C 14.08178977 11.11957577 17.31547428  
C 14.12998653 9.00558223 18.57307174  
C 14.25359665 10.43725073 18.54935663  
C 13.41068517 12.37885245 17.29406367  
C 10.99534128 13.83219227 17.24967849  
C 12.87571154 12.88616588 18.51519371  
C 11.63201781 13.60041825 18.51335160  
C 9.57007166 13.99937039 17.20238675  
C 6.91427361 13.03836606 17.06321388  
C 8.81822056 13.92893303 18.42050403  
C 7.43905953 13.53239976 18.30575459  
C 6.06006674 11.88880864 17.07214523  
C 6.00208815 9.07627629 17.26986027  
C 5.71388811 11.27282378 18.32025198  
C 5.74933935 9.83459990 18.45196689  
C 6.68606210 7.81591639 17.37385185  
C 8.30533107 6.52829340 18.70956014  
C 7.12909481 7.35954275 18.65758413  
C 10.41033579 6.13188243 19.95705792  
C 8.98424504 6.32200921 19.95525801  
C 13.05926440 7.20768572 19.87379842  
C 12.51769130 6.77240044 21.13201769  
C 11.16644206 6.23940110 21.17395013  
C 13.93037642 8.34907117 19.82970896  
C 14.15838385 11.17898203 19.76082749  
C 14.27996264 9.05079125 21.03836179  
C 14.41122890 10.49937638 21.00274258  
C 13.42145812 12.41317855 19.74233793  
C 10.90525608 13.74488821 19.74832853  
C 12.90826646 12.94331331 20.97118034  
C 11.56869963 13.48357764 20.99804615  
C 9.47575678 13.87479010 19.70886157  
C 6.75056544 13.17759821 19.46689549  
C 8.72020624 13.55602211 20.90868886  
C 7.35312708 13.25235975 20.75984269  
C 5.85441674 12.06223141 19.47054421  
C 5.93520152 9.23983070 19.75258669  
C 5.84936348 10.08372159 20.92766167  
C 5.86963261 11.49081913 20.77321101  
C 6.63387483 7.98106299 19.85447508  
C 7.13495600 7.52108871 21.13222153



C 8.30220798 6.65459109 21.17728065  
C 7.88990141 9.61671787 23.89388004  
C 7.69325835 8.26111895 23.44642209  
C 6.32076037 9.60322599 22.16872051  
C 6.83474281 8.27447806 22.29577835  
C 7.01238977 10.44438964 23.11469671  
C 9.95862301 7.74464949 24.18099603  
C 8.74144716 7.36973165 23.52622335  
C 10.20640122 9.08863246 24.59172588  
C 9.14585967 10.07482165 24.34934197  
C 13.77183621 9.21459230 23.48035358  
C 13.98920828 10.59288607 23.45424151  
C 12.63913431 8.66816561 24.19250839  
C 11.59676069 9.52331442 24.69013347  
C 11.85992681 10.93061690 24.67184493  
C 13.09696887 11.43128316 24.19324145  
C 13.96316037 8.43940769 22.27223695  
C 14.27166204 11.24024963 22.19133976  
C 11.00104210 6.96838102 23.54845147  
C 10.44791094 6.31000210 22.38583854  
C 9.03464783 6.53919742 22.38169455  
C 13.07295321 7.31464421 22.31159126  
C 12.29697844 7.43780466 23.52165289  
C 9.50376198 11.45673571 24.00863390  
C 10.82348401 11.86167274 24.23429636  
C 7.39609168 11.75279515 22.72708419  
C 6.72307301 12.29167684 21.61073836  
C 13.51630883 12.48397828 22.16673249  
C 8.71093828 12.23422387 23.06371707  
C 10.79376082 13.31851502 22.21818566  
C 12.83814824 12.61043742 23.39888044  
C 11.44284545 12.85927261 23.39109807  
C 9.37384611 13.13452576 22.13149443

### **Fe<sub>49</sub>S<sub>6</sub> with CNT(10,0)**

Fe 9.79325393 10.09740391 7.35298828  
Fe 11.88757826 10.08171697 8.32471554  
Fe 9.76239583 10.02587263 9.76846901  
Fe 9.78360863 10.10984582 5.09620346  
Fe 7.74475322 10.12733578 6.33140412  
Fe 9.18936511 12.05704544 6.33943084  
Fe 10.47233742 12.05775777 8.36918780  
Fe 9.13828053 8.16772214 6.31267994  
Fe 10.42450267 8.08930639 8.31778577  
Fe 8.07912492 8.87429632 8.32587804  
Fe 8.12964654 11.35557647 8.34333697  
Fe 11.43102312 8.88591775 6.30904586  
Fe 11.44919964 11.29358736 6.32343789  
Fe 14.27017437 10.04477019 9.40441274  
S 12.33272136 10.09126477 10.44520550  
S 10.11835075 10.52066812 12.01278437  
Fe 9.77279619 10.12231103 2.67962061  
Fe 7.65326522 10.12650930 3.95131035  
Fe 5.57981060 10.13433272 5.28173770

Fe 8.52734677 14.12480305 5.28784807  
Fe 9.83305528 14.11860277 7.44485279  
Fe 11.25996577 14.33652199 9.47435007  
Fe 8.44744065 6.11133486 5.26499733  
Fe 9.71543253 6.07133693 7.41595977  
Fe 11.09019485 5.87891320 9.51096994  
Fe 6.21131181 7.53565071 9.53366301  
Fe 6.37087056 10.15451940 9.61634507  
Fe 6.28108937 12.76678478 9.49291063  
Fe 13.15378079 7.59452171 5.23183259  
Fe 13.24364980 10.08115920 5.26930456  
Fe 13.20352088 12.55981080 5.25143942  
S 7.84934847 8.72400060 10.46512187  
S 7.87447016 11.57526036 10.47921238  
Fe 13.59603177 8.78297534 7.38567999  
Fe 13.62781372 11.32733877 7.39505622  
Fe 5.93773821 8.91589326 7.43754036  
Fe 5.97803708 11.36726130 7.44103214  
Fe 11.48586135 8.84987892 3.92635891  
Fe 11.50590644 11.35515401 3.93763340  
Fe 12.63278103 12.11293703 9.61799886  
S 10.65018540 12.48339960 10.50366831  
Fe 9.13389828 12.14266336 3.95553926  
Fe 7.00442901 12.17459513 5.31407314  
Fe 12.56964238 8.04929415 9.58279862  
S 10.54666519 7.82144924 10.45757294  
Fe 9.10550962 8.09371462 3.93301070  
Fe 6.95885336 8.08677652 5.29755084  
Fe 7.50028830 13.40909811 7.44342214  
Fe 8.82106091 13.38996614 9.65003622  
Fe 7.41172291 6.84472548 7.43210944  
Fe 8.70791290 6.83267023 9.64951042  
Fe 10.88912006 13.40580285 5.29125309  
Fe 12.21006304 13.31881942 7.41991177  
Fe 10.82273632 6.79306242 5.27178739  
Fe 12.13420137 6.81969465 7.40288551  
C 13.10706557 12.41129882 11.53134335  
C 13.88221351 10.05097846 11.50278378  
C 13.71557761 11.31487255 12.23640662  
C 11.12817882 13.89044757 11.61470711  
C 12.26953881 13.28946425 12.31475226  
C 8.65733938 13.92187026 11.55547769  
C 9.86253956 14.10742665 12.32706531  
C 6.59504283 12.53960756 11.54509851  
C 7.51104135 13.42869811 12.27040016  
C 5.81219372 10.17561537 11.50341795  
C 5.96375876 11.41182210 12.23984957  
C 6.54447978 7.80082949 11.58779105  
C 5.95794602 8.95726190 12.26355652  
C 8.54930305 6.35216784 11.57164695  
C 7.45136110 6.91017204 12.32083695  
C 11.02072654 6.26848709 11.56110537  
C 9.76655580 6.11724382 12.30724232  
C 13.04866596 7.70279720 11.46111314  
C 12.19913271 6.81986124 12.22686295

C 13.69596759 8.76734058 12.19510880  
C 12.23061435 13.23083646 13.74055164  
C 13.72241275 11.26422955 13.66015499  
C 13.10535980 12.31765609 14.42163620  
C 9.86912103 14.04214541 13.75362172  
C 11.09519265 13.75826191 14.47294685  
C 7.48615712 13.39864595 13.69521598  
C 8.62405770 13.85743975 14.44644216  
C 5.93988726 11.43878762 13.65660688  
C 6.54419709 12.54684206 14.37061751  
C 5.96924929 8.96656525 13.69056899  
C 5.75081010 10.20497818 14.37567846  
C 7.47461156 6.98511881 13.74917995  
C 6.59153894 7.89647037 14.43633332  
C 9.80880664 6.18183116 13.73535900  
C 8.60568308 6.46652123 14.47505258  
C 12.21126087 6.82651926 13.65408937  
C 11.07264604 6.35596969 14.41041703  
C 13.74647963 8.76692258 13.61039847  
C 13.14749079 7.67247282 14.33113470  
C 13.95372609 10.01014452 14.32784630  
C 11.07301136 13.67067150 15.89753972  
C 13.09586788 12.25479770 15.84766283  
C 12.18512696 13.06962255 16.60051696  
C 8.60789220 13.80045390 15.87280944  
C 9.83447654 13.88184194 16.61409524  
C 6.49786316 12.56061327 15.78405445  
C 7.43342698 13.34381543 16.55133549  
C 5.70517104 10.22252655 15.78967715  
C 5.81021599 11.49020231 16.45606734  
C 6.61471543 7.95207019 15.86280699  
C 5.96493167 9.03119608 16.54921366  
C 8.64101198 6.54612993 15.90222603  
C 7.53487444 7.13909006 16.61122718  
C 11.10317680 6.40859871 15.83664524  
C 9.88526750 6.32807321 16.59781113  
C 13.20949580 7.65178774 15.74513959  
C 12.28459401 6.86420478 16.51171601  
C 14.01269946 9.98642757 15.73961053  
C 13.90950416 8.71642997 16.40777860  
C 13.75511833 11.17452646 16.51459813  
C 9.81652547 13.82847223 18.04216331  
C 12.18199171 13.01139716 18.02762967  
C 11.06622069 13.60159415 18.73013986  
C 7.41337552 13.29435285 17.98642149  
C 8.57650563 13.63508949 18.76006257  
C 5.73711398 11.51330331 17.84032698  
C 6.42089319 12.50484951 18.61683390  
C 5.97558603 9.07925412 17.98457227  
C 5.67014204 10.31038932 18.61438676  
C 7.55164463 7.19143238 18.04012788  
C 6.68584636 8.09875887 18.75882906  
C 9.91960008 6.37575206 18.02612761  
C 8.67618500 6.59976501 18.72709934  
C 12.32229393 6.90517616 17.94700587

C 11.16819877 6.56164232 18.73226653  
C 13.99850730 8.68507358 17.79089929  
C 13.32418319 7.69004645 18.56931364  
C 13.75797067 11.11872268 17.94861864  
C 14.07165178 9.88556566 18.57139390  
C 13.05259567 12.09603970 18.73146765  
C 6.70399008 9.64482123 20.76630356  
C 7.54015503 10.12448265 21.86117685  
C 6.13298675 10.61730388 19.92944672  
C 6.59754171 11.98006324 19.93091881  
C 8.01315782 11.51082254 21.86237835  
C 7.64459515 12.40096297 20.76811480  
C 8.33934499 7.81008223 22.08279251  
C 7.73276035 7.42258094 20.86380458  
C 6.87747992 8.31759158 20.18170409  
C 8.31679359 9.14445227 22.55117228  
C 10.56098146 8.37484971 22.54059083  
C 11.76778017 8.67492339 21.83814016  
C 9.67508288 9.44336892 22.99119426  
C 12.24096027 10.06166691 21.83751759  
C 10.11819665 10.73890967 22.99178872  
C 11.47185297 11.03951473 22.53949988  
C 13.16026651 8.21144913 19.88824946  
C 13.62624589 9.57410473 19.88892768  
C 9.94901563 6.66426459 20.85159746  
C 8.69988840 6.64411953 20.12296470  
C 9.71950724 7.33710837 22.07554028  
C 11.16563399 6.84860223 20.15609485  
C 12.12265918 7.78876775 20.73435450  
C 13.06124370 10.54448279 20.73362568  
C 12.87770187 11.87178184 20.15487442  
C 9.22731902 11.80877227 22.55402502  
C 12.03265680 12.76550782 20.85053659  
C 11.05765588 13.54959388 20.12446789  
C 11.44318070 12.37573889 22.07570995  
C 10.06201811 12.84957188 22.08606119  
C 9.81772271 13.52689490 20.86714204  
C 8.59411193 13.34348151 20.18311446

#### **Fe<sub>49</sub>S<sub>6</sub> with CNT(6,6)**

Fe 9.89416200 9.93175162 9.81251318  
Fe 11.97242222 9.97617064 10.85529380  
Fe 9.88838245 9.99626896 12.37120897  
Fe 9.89785705 9.88603864 7.56873157  
Fe 7.86318561 9.86012223 8.76843053  
Fe 9.23929257 11.83561436 8.73115851  
Fe 10.49546378 11.95924164 10.76347104  
Fe 9.32450384 7.94909152 8.84665928  
Fe 10.59766018 7.99758371 10.90022141  
Fe 8.22248491 8.69422621 10.82594227  
Fe 8.16578408 11.15763104 10.75775272  
Fe 11.56772431 8.74278203 8.81884870  
Fe 11.53631716 11.12724538 8.78406828  
Fe 14.19656777 10.00452789 11.93415127

S 12.04001205 10.15389977 13.01077892  
S 9.91344747 9.95426062 14.77247757  
Fe 9.88129488 9.85454291 5.12276297  
Fe 7.77840355 9.80270227 6.38091656  
Fe 5.68943130 9.78690098 7.72135942  
Fe 8.52240527 13.87591947 7.65844313  
Fe 9.78806704 13.96712788 9.75574362  
Fe 11.21296604 14.12273936 11.85978766  
Fe 8.72320508 5.83751736 7.83977500  
Fe 10.00725387 5.92101598 9.96755086  
Fe 11.36724165 5.94019005 12.07408320  
Fe 6.47482023 7.28981551 12.00020344  
Fe 6.38241192 9.92353853 12.02878665  
Fe 6.32354785 12.45245888 11.96359037  
Fe 13.34438931 7.46865521 7.75361794  
Fe 13.35619495 9.93475314 7.70281413  
Fe 13.28184417 12.39423231 7.69051887  
S 8.02353947 8.67951328 12.94387259  
S 8.14895841 11.22427997 12.88838631  
Fe 13.71920123 8.72415275 9.87445583  
Fe 13.70249012 11.21969420 9.82864406  
Fe 6.08091785 8.62637845 9.85653213  
Fe 6.02823962 11.12789831 9.77679499  
Fe 11.62262132 8.65195097 6.42723235  
Fe 11.58005534 11.13905990 6.38985985  
Fe 12.67486612 12.10062422 11.98746260  
S 10.49509805 12.20321207 12.87857976  
Fe 9.21895246 11.87589932 6.34477422  
Fe 7.08558117 11.84643217 7.61489813  
Fe 12.77633490 7.98550260 12.28593389  
S 10.50978709 7.95331715 13.06233609  
Fe 9.28219098 7.83869855 6.45954887  
Fe 7.15477060 7.77403718 7.76109791  
Fe 7.43027079 13.14095994 9.74750973  
Fe 8.73010438 13.29174993 11.98397147  
Fe 7.61349657 6.61226008 9.92109723  
Fe 8.87814284 6.65932844 12.13844646  
Fe 10.92381755 13.19715320 7.65624573  
Fe 12.21265858 13.23383083 9.77886831  
Fe 11.04631014 6.61192174 7.78233493  
Fe 12.34713620 6.75283538 9.93395459  
C 11.20543056 5.69652413 13.94519085  
C 12.43889100 6.36195256 13.81853389  
C 14.23768628 8.93075963 13.72048771  
C 14.44880928 10.32149737 13.77576588  
C 12.96984844 13.07812261 13.67591442  
C 11.89174528 13.99370821 13.70765421  
C 8.79017591 14.20889523 13.66464685  
C 7.52619643 13.63983566 13.58268455  
C 5.67769527 11.03999732 13.61080868  
C 5.57449258 9.65498370 13.73415101  
C 8.11070385 6.12139692 13.87459804  
C 6.86661835 6.80242304 13.87633578  
C 10.34573159 5.80498167 15.07116789  
C 8.89042541 5.97316518 15.06164048

C 12.99999466 7.03143428 14.95413351  
C 11.06426388 6.11738754 16.27423104  
C 12.38071364 6.69130817 16.21745378  
C 13.85113737 8.22695928 14.90886316  
C 14.11663706 11.14132876 14.88763690  
C 14.03817183 8.97453205 16.12999465  
C 14.14978716 10.40723916 16.11921484  
C 13.44535282 12.44191123 14.86334486  
C 11.06194967 14.13712154 14.87775782  
C 12.87798600 12.93550140 16.09881290  
C 11.68164697 13.73797559 16.11303022  
C 9.59985168 14.26537262 14.84334873  
C 6.93498124 13.02435288 14.74689083  
C 8.85836352 14.03026545 16.05275570  
C 7.53485883 13.44996400 15.98683856  
C 6.07951874 11.82627827 14.75822343  
C 5.80958366 8.90701727 14.92915605  
C 5.86904240 11.15588176 16.01295521  
C 5.76175012 9.71886301 16.11072383  
C 6.45044318 7.58517560 15.01098380  
C 8.24433143 6.39283726 16.28607397  
C 7.05498444 7.20318845 16.26082193  
C 10.36338165 6.10577356 17.52539391  
C 8.93916263 6.25679255 17.53508287  
C 12.94601619 7.19011429 17.43408871  
C 11.09233225 6.23419208 18.73928015  
C 12.42214258 6.77330006 18.69196846  
C 13.79806756 8.33730266 17.39061774  
C 13.99489501 11.12307387 17.34763332  
C 14.10899308 9.01543207 18.60194450  
C 14.20706150 10.44736803 18.58135554  
C 13.32822468 12.38419417 17.33985222  
C 10.96402338 13.90187024 17.35343099  
C 12.84114134 12.89944954 18.58074855  
C 11.61002232 13.63281090 18.60562641  
C 9.54610331 14.06473690 17.32778564  
C 6.92340694 13.03960257 17.20621728  
C 8.80726014 13.96355337 18.55123841  
C 7.43586578 13.54691198 18.44687346  
C 6.06842148 11.89440258 17.21644286  
C 5.93813230 9.09551328 17.39933057  
C 5.70653495 11.28904095 18.46398657  
C 5.71958006 9.85133532 18.58784664  
C 6.61870731 7.84073676 17.47442869  
C 8.28587831 6.56811329 18.76769425  
C 7.09872078 7.38389878 18.74543460  
C 10.40086382 6.15307746 19.99051460  
C 8.97489361 6.34198448 20.00510235  
C 13.05419906 7.21179973 19.89966688  
C 12.52086049 6.77143938 21.15721914  
C 11.16888636 6.24234651 21.20336392  
C 13.92523038 8.35182164 19.85532486  
C 14.13596231 11.18242587 19.79811131  
C 14.28181283 9.04815957 21.06263915  
C 14.40968455 10.49673868 21.03322991

C 13.40397545 12.41930341 19.79730495  
C 10.90160208 13.76656200 19.85101545  
C 12.91387639 12.94348524 21.03983618  
C 11.57840854 13.48851579 21.08990101  
C 9.47314208 13.90175719 19.83153334  
C 6.75214390 13.19022952 19.60736488  
C 8.72838047 13.56837663 21.03532026  
C 7.36188659 13.26006086 20.89621942  
C 5.85525300 12.07430345 19.61246923  
C 5.91615401 9.24802612 19.87791148  
C 5.85057438 10.08689082 21.05819339  
C 5.87839329 11.49486665 20.91105212  
C 6.61818242 7.98954893 19.95557415  
C 7.13807674 7.52133850 21.22348657  
C 8.30627735 6.65637241 21.24164380  
C 7.92892224 9.59621487 23.98969927  
C 7.72377910 8.24386610 23.53484649  
C 6.33627781 9.59682849 22.28844461  
C 6.85083643 8.26525437 22.39631969  
C 7.04346156 10.43017442 23.22804640  
C 9.99639762 7.72184310 24.23614406  
C 8.77156179 7.35130236 23.59194801  
C 10.24979281 9.06132143 24.65694268  
C 9.18863898 10.05091749 24.43447905  
C 13.80231745 9.19322032 23.51092368  
C 14.02147199 10.57081275 23.49291813  
C 12.67592279 8.64242642 24.23002963  
C 11.64058932 9.49477997 24.74344162  
C 11.90654582 10.90245570 24.73624946  
C 13.13883271 11.40468973 24.24936701  
C 13.97946314 8.42724900 22.29515271  
C 14.28947418 11.22805570 22.23042667  
C 11.03071330 6.94922884 23.58721646  
C 10.46446193 6.30060566 22.42427027  
C 9.05133908 6.52924999 22.43737198  
C 13.09020733 7.30238672 22.33525985  
C 12.32648341 7.41678471 23.55377411  
C 9.54526855 11.43599886 24.10234481  
C 10.86652936 11.83948976 24.31987792  
C 7.42446784 11.74214698 22.84774078  
C 6.74089433 12.28979099 21.74361415  
C 13.53554498 12.47255324 22.22530502  
C 8.74333299 12.22172731 23.17320092  
C 10.81718208 13.31452156 22.31706427  
C 12.87240530 12.59102219 23.46655370  
C 11.47803408 12.84491936 23.47928098  
C 9.39554394 13.13279365 22.24470969
